# Supplementary material for: Ring expansion of spirocyclopropanes with stabilized sulfonium ylides: highly diastereoselective synthesis of cyclobutanes
Source: Royal Society of Chemistry journal article supplement (doi:10.1039/d3cc06033k), 2024-01-01

*Electronic Supplementary Information for*

**Ring expansion of spirocyclopropanes with stabilized sulfonium ylides: highly diastereoselective synthesis of cyclobutanes**

Hisanori Nambu,<sup>\*ab</sup> Yuta Onuki,<sup>a</sup> Kana Aso,<sup>a</sup> Momoka Kanamori,<sup>a</sup> Keisuke Tomohara,<sup>b</sup> Kiyoshi Tsuge<sup>c</sup> and Takayuki Yakura<sup>\*a</sup>

<sup>a</sup> Faculty of Pharmaceutical Sciences, University of Toyama, Sugitani, Toyama 930-0194, Japan.

<sup>b</sup> Laboratory of Pharmaceutical Manufacturing Chemistry, Kyoto Pharmaceutical University, Kyoto 607-8412, Japan.

<sup>c</sup> Graduate School of Science and Engineering, University of Toyama, Gofuku, Toyama 930-8555, Japan.

**Contents:**

Experimental section

|                                                                                                                                                     |         |
|-----------------------------------------------------------------------------------------------------------------------------------------------------|---------|
| General                                                                                                                                             | S2      |
| I. Preparation of spirocyclopropanes <b>2a–h</b> and <b>6</b>                                                                                       | S3–S7   |
| II. Ring expansion of spirocyclopropanes with sulfonium ylides                                                                                      | S8–S15  |
| III. Conversion of spirocyclopropane <b>3a</b> into cyclobutane <b>4</b>                                                                            | S16     |
| References                                                                                                                                          | S17     |
| <sup>1</sup> H and <sup>13</sup> C NMR spectra of <b>2a–h</b> , <b>6</b> , <b>3a–o</b> , <b>4</b> , <b>7a</b> , <b>8a</b> , <b>7b</b> and <b>8b</b> | S18–S46 |

## Experimental section

**General.** Melting points are uncorrected. IR spectra were recorded on a JASCO FT/IR-460 Plus spectrophotometer and absorbance bands are reported in wavenumber ( $\text{cm}^{-1}$ ). All NMR spectra were recorded using Bruker Ascend 500 (500 MHz), JEOL JNM-ECX400P (400 MHz) and Bruker Ultrashield<sup>TM</sup> 300 (300 MHz) spectrometers. <sup>1</sup>H NMR spectra were recorded at 500 or 400 MHz. Chemical shifts are reported relative to internal standard (tetramethylsilane at  $\delta_{\text{H}}$  0.00 or  $\text{CDCl}_3$  at  $\delta_{\text{H}}$  7.26). Data are presented as follows: chemical shift ( $\delta$ , ppm), multiplicity (s = singlet, d = doublet, t = triplet, q = quartet, m = multiplet), coupling constant and integration. <sup>13</sup>C NMR spectra were recorded at 100 or 75 MHz. The following internal reference was used ( $\text{CDCl}_3$  at  $\delta$  77.0). All <sup>13</sup>C NMR spectra were determined with complete proton decoupling. High-resolution mass spectra (HRMS) were determined with Thermo Scientific LTQ Orbitrap XL ETD [electrospray ionization (ESI)]. Column chromatography was performed on Silica Gel 60 PF<sub>254</sub> (Nacalai Tesque) and Kanto silica gel 60 N (63–210 mesh) under pressure. Analytical thin layer chromatography (TLC) was carried out on Merck Kieselgel 60 F<sub>254</sub> plates. Visualization was accomplished with UV light and phosphomolybdic acid stain solution or basic potassium permanganate stain solution followed by heating.

All reagents, such as Meldrum's acid, 1,3-dimethylbarbituric acid, powdered  $\text{K}_2\text{CO}_3$ ,  $\text{Rh}_2(\text{esp})_2$ , 4-acetoxystyrene, 3-methoxystyrene, 2-vinylnaphthalene, 1,4-dibromobut-2-ene, conc.  $\text{H}_2\text{SO}_4$ ,  $\text{C}_6\text{H}_5\text{Cl}$ , dehydrated EtOAc,  $\text{CH}_2\text{Cl}_2$ , DMF,  $\text{Et}_2\text{O}$  and MeOH are commercially available and were purchased from suppliers such as Sigma-Aldrich Co.; Wako Pure Chemical Industries, Ltd.; Tokyo Chemical Industry Co., Ltd.; Nacalai Tesque, INC. Purchased  $\text{C}_6\text{H}_5\text{Cl}$  was distilled and used as an anhydrous solvent. (2-Bromo-1-phenylethyl)dimethylsulfonium bromide,<sup>1</sup> [2-bromo-1-(4-methylphenyl)ethyl]dimethylsulfonium bromide,<sup>1</sup> [2-bromo-1-(4-bromophenyl)ethyl]dimethylsulfonium bromide,<sup>1</sup> (2-bromoethyl)diphenylsulfonium trifluoromethanesulfonate,<sup>2</sup> dimethylsulfonium benzoylmethylide (**1a**),<sup>3</sup> dimethylsulfonium 4-methoxybenzoylmethylide (**1b**),<sup>3</sup> dimethylsulfonium 3-methoxybenzoylmethylide (**1c**),<sup>4</sup> dimethylsulfonium 2-methoxybenzoylmethylide (**1d**),<sup>5</sup> dimethylsulfonium 4-nitrobenzoyl-methylide (**1e**),<sup>3</sup> dimethylsulfonium 4-chlorobenzoylmethylide (**1f**),<sup>3</sup> and tetrahydrothiophenium acetylmethylide (**1g**),<sup>3</sup> dimethylsulfonium ethoxycarbonylmethylide (**1h**)<sup>3</sup> were prepared according to literature procedures.

## I. Preparation of spirocyclopropanes 2a–h and 6

### 6,6-Dimethyl-1-phenyl-5,7-dioxaspiro[2.5]octane-4,8-dione (2a).<sup>6</sup>

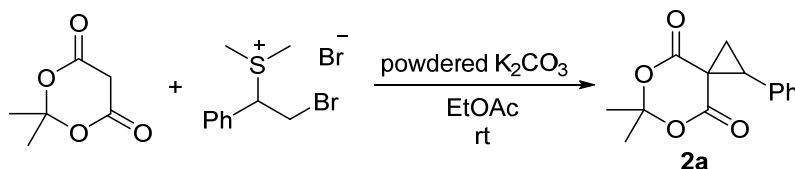

Meldrum's acid (288 mg, 2.0 mmol) and powdered  $\text{K}_2\text{CO}_3$  (830 mg, 6.0 mmol) were added to a suspension of (2-bromo-1-phenylethyl)dimethylsulfonium bromide (782 mg, 2.4 mmol) in EtOAc (20 mL). After stirring at room temperature for 3 h, the reaction was quenched with water (20 mL), and the resulting mixture was extracted with EtOAc ( $3 \times 20$  mL). The combined organic layers were washed with brine (20 mL) and dried over anhydrous  $\text{MgSO}_4$ . The filtrate was concentrated in vacuo, and the residue was purified by column chromatography (silica gel, 25% EtOAc in hexane) to provide **2a** (422 mg, 86%) as a white solid: mp 134.2–135.8 °C [lit.,<sup>6</sup> mp 130–131 °C]; IR (film,  $\text{cm}^{-1}$ )  $\nu$  3002, 1766, 1741, 1328, 1292, 1203, 1176;  $^1\text{H}$  NMR (400 MHz,  $\text{CDCl}_3$ )  $\delta$  7.37–7.30 (m, 5H), 3.45 (t,  $J = 9.4$  Hz, 1H), 2.69 (dd,  $J = 9.4, 4.8$  Hz, 1H), 2.55 (dd,  $J = 9.4, 4.8$  Hz, 1H), 1.73 (s, 3H), 1.72 (s, 3H);  $^{13}\text{C}$  NMR (100 MHz,  $\text{CDCl}_3$ )  $\delta$  167.7, 163.4, 131.0, 129.4, 128.7, 128.4, 104.9, 44.6, 33.1, 27.9, 27.6, 22.9.

### 6,6-Dimethyl-1-*p*-tolyl-5,7-dioxaspiro[2.5]octane-4,8-dione (2c).<sup>6</sup>

According to the procedure for the synthesis of **2a**, **2c** was prepared from Meldrum's acid (288 mg, 2.0 mmol) with [2-bromo-1-(4-methylphenyl)ethyl]dimethylsulfonium bromide (819 mg, 2.4 mmol) for 3 h. The crude product was purified by column chromatography

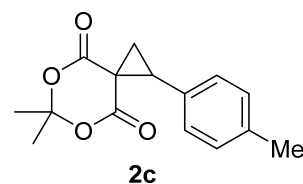

(silica gel, 20% EtOAc in hexane) to provide **2c** (362 mg, 65%) as a white solid: mp 151.0–153.0 °C [lit.,<sup>6</sup> mp 137–138 °C]; IR (KBr,  $\text{cm}^{-1}$ )  $\nu$  3001, 1760, 1736, 1357, 1200, 1186;  $^1\text{H}$  NMR (400 MHz,  $\text{CDCl}_3$ )  $\delta$  7.22 (d,  $J = 8.0$  Hz, 2H), 7.15 (d,  $J = 8.0$  Hz, 2H), 3.42 (t,  $J = 9.5$  Hz, 1H), 2.68 (dd,  $J = 9.2, 4.6$  Hz, 1H), 2.54 (dd,  $J = 9.5, 4.6$  Hz, 1H), 2.33 (s, 3H), 1.73 (s, 3H), 1.72 (s, 3H);  $^{13}\text{C}$  NMR (100 MHz,  $\text{CDCl}_3$ )  $\delta$  167.8, 163.5, 138.7, 129.3, 129.1, 128.0, 104.9, 44.8, 33.2, 27.9, 27.7, 22.9, 21.2.

### 1-(4-Bromophenyl)-6,6-dimethyl-5,7-dioxaspiro[2.5]octane-4,8-dione (**2d**).<sup>7</sup>

According to the procedure for the synthesis of **2a**, **2d** was prepared from Meldrum's acid (288 mg, 2.0 mmol) with [2-bromo-1-(4-bromophenyl)ethyl]dimethylsulfonium bromide (974 mg, 2.4 mmol) for 1 h. The crude product was purified by column chromatography

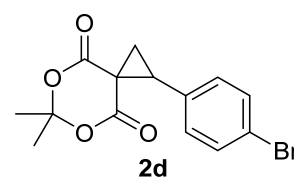

(silica gel, 20% EtOAc in hexane) to provide **2d** (527 mg, 87%) as a white solid: mp 156.0–156.5 °C; IR (KBr,  $\text{cm}^{-1}$ )  $\nu$  3003, 1766, 1740, 1329, 1295, 1203;  $^1\text{H}$  NMR (400 MHz,  $\text{CDCl}_3$ )  $\delta$  7.48 (d,  $J = 8.2$  Hz, 1H), 7.21 (d,  $J = 8.2$  Hz, 1H), 3.39 (t,  $J = 9.4$  Hz, 1H), 2.63 (dd,  $J = 9.2, 5.0$  Hz, 1H), 2.55 (dd,  $J = 9.4, 4.8$  Hz, 1H), 1.74 (s, 3H), 1.71 (s, 3H);  $^{13}\text{C}$  NMR (100 MHz,  $\text{CDCl}_3$ )  $\delta$  167.5, 163.5, 131.6, 131.0, 130.2, 123.0, 105.0, 43.5, 32.9, 28.0, 27.6, 23.1.

### 1-(4-Acetoxyphenyl)-6,6-dimethyl-5,7-dioxaspiro[2.5]octane-4,8-dione (**2b**).<sup>6</sup>

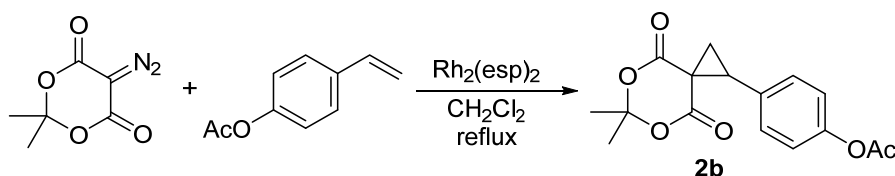

$\text{Rh}_2(\text{esp})_2$  (7.6 mg, 0.01 mmol, 1 mol%) was added to a solution of 5-diazo-2,2-dimethyl-1,3-dioxane-4,6-dione (170 mg, 1.0 mmol), 4-acetoxystyrene (324 mg, 2.0 mmol) in  $\text{CH}_2\text{Cl}_2$  (2.0 mL) at room temperature. After stirring at reflux for 21 h, the reaction was cooled to room temperature. Evaporation in vacuo furnished the crude product, which was purified by column chromatography (silica gel, 10% EtOAc in hexane) to provide **2b** (226 mg, 70%) as a white solid: mp 181.2–182.0 °C [lit.,<sup>6</sup> mp 174–175 °C]; IR (film,  $\text{cm}^{-1}$ )  $\nu$  2997, 1761, 1739, 1335, 1296, 1197, 1169;  $^1\text{H}$  NMR (400 MHz,  $\text{CDCl}_3$ )  $\delta$  7.35 (d,  $J = 8.7$  Hz, 2H), 7.09 (d,  $J = 8.7$  Hz, 2H), 3.42 (t,  $J = 9.4$  Hz, 1H), 2.65 (dd,  $J = 9.4, 4.8$  Hz, 1H), 2.55 (dd,  $J = 9.6, 4.6$  Hz, 1H), 2.29 (s, 3H), 1.74 (s, 3H), 1.72 (s, 3H);  $^{13}\text{C}$  NMR (100 MHz,  $\text{CDCl}_3$ )  $\delta$  169.1, 167.6, 163.5, 150.9, 130.5, 128.6, 121.6, 105.0, 43.8, 33.1, 28.0, 27.6, 23.1, 21.1.

### 1-(3-Methoxyphenyl)-6,6-dimethyl-5,7-dioxaspiro[2.5]octane-4,8-dione (**2e**).<sup>6</sup>

According to the procedure for the synthesis of **2b**, **2e** was prepared from 5-diazo-2,2-dimethyl-1,3-dioxane-4,6-dione (170 mg, 1.0 mmol) with 3-methoxystyrene (268 mg, 2.0 mmol) for 9.5 h. The crude product was purified by column chromatography (silica gel,

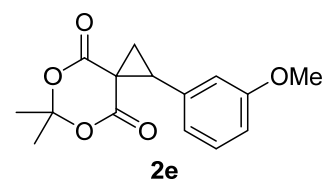

10% EtOAc in hexane) to provide **2e** (237 mg, 81%) as a white solid: mp 92.0–93.0 °C [lit.,<sup>6</sup> mp

84–85 °C]; IR (KBr,  $\text{cm}^{-1}$ )  $\nu$  3003, 1766, 1741, 1329, 1296, 1205;  $^1\text{H}$  NMR (400 MHz,  $\text{CDCl}_3$ )  $\delta$  7.25 (m, 1H), 6.92 (d,  $J = 7.8$  Hz, 1H), 6.87–6.85 (m, 2H), 3.80 (s, 3H), 3.41 (t,  $J = 9.4$  Hz, 1H), 2.66 (dd,  $J = 9.4, 4.8$  Hz, 1H), 2.53 (dd,  $J = 9.4, 4.8$  Hz, 1H), 1.74 (s, 6H);  $^{13}\text{C}$  NMR (100 MHz,  $\text{CDCl}_3$ )  $\delta$  167.8, 163.5, 159.5, 132.7, 129.4, 121.9, 115.1, 114.1, 104.9, 55.2, 44.5, 33.0, 27.9, 27.7, 23.0.

#### 6,6-Dimethyl-1-naphthalen-2-yl-5,7-dioxaspiro[2.5]octane-4,8-dione (**2f**).<sup>6</sup>

According to the procedure for the synthesis of **2b**, **2f** was prepared from 5-diazo-2,2-dimethyl-1,3-dioxane-4,6-dione (170 mg, 1.0 mmol) with 2-vinylnaphthalene (308 mg, 2.0 mmol) for 24 h. The crude product was purified by column chromatography (silica gel,

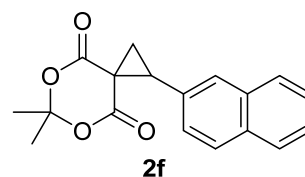

10% EtOAc in hexane) to provide **2f** (234 mg, 75%) as a white solid: mp 142.3–143.8 °C [lit.,<sup>6</sup> mp 141–142 °C]; IR (KBr,  $\text{cm}^{-1}$ )  $\nu$  2998, 1766, 1740, 1332, 1296, 1200;  $^1\text{H}$  NMR (400 MHz,  $\text{CDCl}_3$ )  $\delta$  7.85–7.80 (m, 4H), 7.51–7.48 (m, 2H), 7.42 (dd,  $J = 8.3, 2.0$  Hz, 1H), 3.61 (t,  $J = 9.5$  Hz, 1H), 2.83 (dd,  $J = 9.2, 4.6$  Hz, 1H), 2.63 (dd,  $J = 9.5, 4.9$  Hz, 1H), 1.74 (s, 3H), 1.73 (s, 3H);  $^{13}\text{C}$  NMR (100 MHz,  $\text{CDCl}_3$ )  $\delta$  167.7, 163.5, 133.2, 132.9, 129.1, 128.5, 128.1, 128.0, 127.6, 126.7, 126.6, 126.5, 104.9, 44.9, 33.3, 27.9, 27.7, 23.2.

#### 6,6-Dimethyl-1-vinyl-5,7-dioxaspiro[2.5]octane-4,8-dione (**2g**).<sup>8</sup>

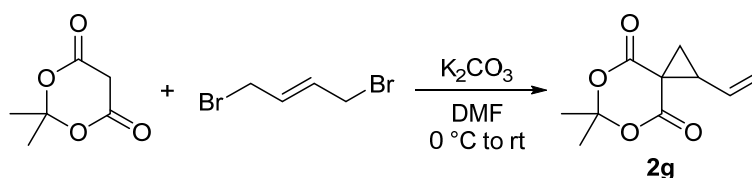

$\text{K}_2\text{CO}_3$  (173 mg, 1.25 mmol) was added to a suspension of Meldrum's acid (144 mg, 1.0 mmol) in DMF (20 mL) at 0 °C. After stirring at 0 °C for 10 min, 1,4-dibromobut-2-ene (257 mg, 1.2 mmol) was added in a single portion and the reaction was additionally stirred at 0 °C for 1 h and at room temperature for 2 h. A further portion of  $\text{K}_2\text{CO}_3$  (173 mg, 1.25 mmol) was added, and then the reaction was stirred at room temperature for 16 h. The reaction was quenched with sat. aq.  $\text{NH}_4\text{Cl}$  (10 mL), and the resulting mixture was extracted with  $\text{Et}_2\text{O}$  ( $3 \times 20$  mL). The combined organic layers were washed with brine (20 mL) and dried over anhydrous  $\text{MgSO}_4$ . The filtrate was concentrated in vacuo, and the residue was purified by column chromatography (silica gel, 1:1  $\text{Et}_2\text{O}$ /hexane) to provide **2g** (112 mg, 57%) as a white solid: mp 48.0–48.5 °C; IR (film,  $\text{cm}^{-1}$ )  $\nu$  3002, 1768, 1742, 1353, 1326, 1284, 1198;  $^1\text{H}$  NMR (400 MHz,  $\text{CDCl}_3$ )  $\delta$  5.76 (dt,  $J =$

16.9, 10.1 Hz, 1H), 5.47 (dd,  $J = 16.9, 0.9$  Hz, 1H), 5.35 (dd,  $J = 10.1, 0.9$  Hz, 1H), 2.78 (q,  $J = 9.2$  Hz, 1H), 2.37 (dd,  $J = 9.2, 4.6$  Hz, 1H), 2.23 (dd,  $J = 8.7, 4.6$  Hz, 1H), 1.78 (s, 3H), 1.73 (s, 3H);  $^{13}\text{C}$  NMR (100 MHz,  $\text{CDCl}_3$ )  $\delta$  167.4, 165.1, 131.2, 121.8, 105.0, 42.9, 31.4, 27.6, 27.5, 24.5.

#### 6,6-Dimethyl-5,7-dioxaspiro[2.5]octane-4,8-dione (**2h**).<sup>2</sup>

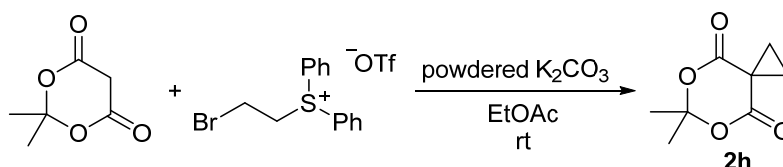

Meldrum's acid (288 mg, 2.0 mmol) and powdered  $\text{K}_2\text{CO}_3$  (829 mg, 6.0 mmol) were added to a suspension of (2-bromoethyl)diphenylsulfonium trifluoromethanesulfonate (1.33 g, 3.0 mmol) in EtOAc (20 mL). After stirring at room temperature for 1 h, the reaction was quenched with water (10 mL), and the resulting mixture was extracted with EtOAc ( $3 \times 10$  mL). The combined organic layers were washed with brine (10 mL) and dried over anhydrous  $\text{MgSO}_4$ . The filtrate was concentrated in vacuo, and the residue was purified by column chromatography (silica gel, 20% EtOAc in hexane) to provide **2h** (297 mg, 87%) as a white solid: mp 65.5–66.3 °C [lit.,<sup>2</sup> mp 60.5–61.5 °C]; IR (film,  $\text{cm}^{-1}$ )  $\nu$  3021, 1775, 1752, 1399, 1337, 1205;  $^1\text{H}$  NMR (400 MHz,  $\text{CDCl}_3$ )  $\delta$  1.99 (s, 4H), 1.82 (s, 6H);  $^{13}\text{C}$  NMR (100 MHz,  $\text{CDCl}_3$ )  $\delta$  168.1, 105.1, 27.6, 24.1 23.9.

#### 5,7-dimethyl-1-phenyl-5,7-diazaspiro[2.5]octane-4,6,8-trione (**6**).<sup>9</sup>

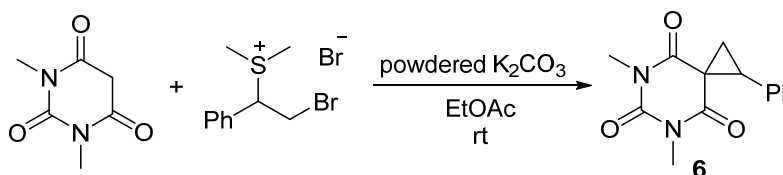

1,3-Dimethylbarbituric acid (156 mg, 1.0 mmol) and powdered  $\text{K}_2\text{CO}_3$  (415 mg, 3.0 mmol) were added to a suspension of (2-bromo-1-phenylethyl)dimethylsulfonium bromide (391 mg, 1.2 mmol) in EtOAc (20 mL). After stirring at room temperature for 9 h, the reaction was quenched with water (20 mL), and the resulting mixture was extracted with EtOAc ( $3 \times 20$  mL). The combined organic layers were washed with brine (20 mL) and dried over anhydrous  $\text{MgSO}_4$ . The filtrate was concentrated in vacuo, and the residue was purified by column chromatography (silica gel, 40% EtOAc in hexane) to provide **6** (175 mg, 68%) as a white solid: mp 93.0–93.5 °C [lit.,<sup>9a</sup> mp 78–80 °C, lit.,<sup>9b</sup> mp 87–88 °C]; IR (film,  $\text{cm}^{-1}$ )  $\nu$  3019, 1737, 1690, 1673, 1420, 1387, 1214;  $^1\text{H}$  NMR (400 MHz,  $\text{CDCl}_3$ )  $\delta$  7.29–7.26 (m, 5H), 3.52 (t,  $J = 9.2$  Hz, 1H), 3.37 (s, 3H), 3.11 (s,

3H), 2.59 (dd,  $J = 9.2, 3.2$  Hz, 1H), 2.45 (dd,  $J = 9.2, 3.2$  Hz, 1H);  $^{13}\text{C}$  NMR (100 MHz,  $\text{CDCl}_3$ )  
 $\delta$  168.2, 164.8, 151.8, 132.4, 129.6, 128.1, 127.9, 46.2, 35.8, 28.7, 28.4, 24.5.

## II. Ring expansion of spirocyclopropanes with sulfonium ylides

Typical procedure for the ring expansion of spirocyclopropane **2a** with sulfonium ylide **1a** (Table 1, entry 6):

*rac*-(1*R*,2*S*)-1-Benzoyl-7,7-dimethyl-2-phenyl-6,8-dioxaspiro[3.5]nonane-5,9-dione (**3a**).

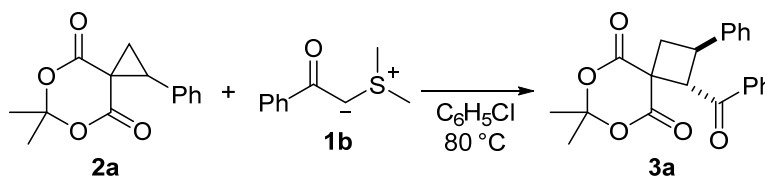

Dimethylsulfonium benzoylmethylide (**1a**) (81 mg, 0.45 mmol) was added to a solution of 6,6-dimethyl-1-phenyl-5,7-dioxaspiro[2.5]octane-4,8-dione (**2a**) (74 mg, 0.30 mmol) in  $C_6H_5Cl$  (1.5 mL) at room temperature. After stirring at  $80\text{ }^\circ C$  for 6 h, the reaction was cooled to room temperature. Evaporation in vacuo furnished the crude product, which was purified by column chromatography (silica gel, 10% EtOAc in hexane) to provide **3a** (94 mg, 86%) as a white solid: mp  $134.0\text{--}135.0\text{ }^\circ C$ ; IR (film,  $cm^{-1}$ )  $\nu$  3003, 1771, 1739, 1685, 1301, 1203;  $^1H$  NMR (400 MHz,  $CDCl_3$ )  $\delta$  7.48–7.23 (m, 10H), 4.86 (d,  $J = 10.1$  Hz, 1H), 4.32 (dt,  $J = 10.1, 9.6$  Hz, 1H), 2.92 (d,  $J = 9.6$  Hz, 2H), 1.76 (s, 3H), 1.74 (s, 3H);  $^{13}C$  NMR (100 MHz,  $CDCl_3$ )  $\delta$  196.8, 170.0, 168.4, 141.7, 134.6, 133.4, 129.0, 128.5, 128.3, 127.8, 127.7, 105.8, 57.4, 46.3, 39.1, 38.1, 29.1, 28.0; HRMS (ESI)  $m/z$  calcd for  $C_{22}H_{21}O_5$  (M+H) $^+$  365.1384, found 365.1383.

*rac*-(1*R*,2*S*)-1-(4-Methoxybenzoyl)-7,7-dimethyl-2-phenyl-6,8-dioxaspiro[3.5]nonane-5,9-dione (**3b**) (Table 2, entry 2).

According to the typical procedure for the ring expansion of **2a** with **1a**, **3b** was prepared from **2a** (74 mg, 0.30 mmol) with **1b** (95 mg, 0.45 mmol) for 6 h. The crude product was purified by column chromatography (silica gel, 10% EtOAc in hexane) to

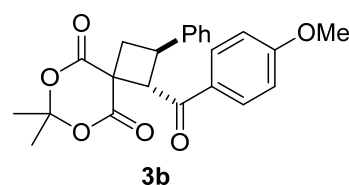

provide **3b** (87 mg, 74%) as a white solid: mp  $116.8\text{--}117.6\text{ }^\circ C$ ; IR (KBr,  $cm^{-1}$ )  $\nu$  3007, 1769, 1739, 1601, 1302, 1262, 1204, 1171;  $^1H$  NMR (400 MHz,  $CDCl_3$ )  $\delta$  7.50–7.26 (m, 9H), 4.82 (d,  $J = 10.1$  Hz, 1H), 4.31 (dt,  $J = 10.1, 9.6$  Hz, 1H), 3.79 (s, 3H), 2.91 (d,  $J = 9.6$  Hz, 2H), 1.79 (s, 3H), 1.74 (s, 3H);  $^{13}C$  NMR (100 MHz,  $CDCl_3$ )  $\delta$  194.9, 170.2, 168.6, 163.8, 141.8, 130.9, 129.0, 127.8, 127.3, 113.7, 105.7, 57.9, 55.4, 46.1, 39.6, 38.0, 29.1, 28.1; HRMS (ESI)  $m/z$  calcd for  $C_{23}H_{23}O_6$  (M+H) $^+$  395.1489, found 395.1490.



***rac*-(1*R*,2*S*)-1-(3-Methoxybenzoyl)-7,7-dimethyl-2-phenyl-6,8-dioxaspiro[3.5]nonane-5,9-dione (3c) (Table 2, entry 3).**

According to the typical procedure for the ring expansion of **2a** with **1a**, **3c** was prepared from **2a** (74 mg, 0.30 mmol) with **1c** (95 mg, 0.45 mmol) for 6 h. The crude product was purified by column chromatography (silica gel, 10% to 30% EtOAc in

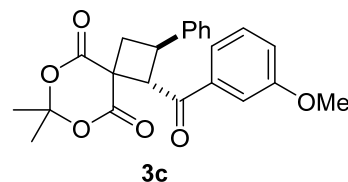

hexane) to provide **3c** (102 mg, 86%) as a colorless amorphous: IR (ATR,  $\text{cm}^{-1}$ )  $\nu$  1737, 1667, 1597, 1283, 1246, 1199;  $^1\text{H}$  NMR (500 MHz,  $\text{CDCl}_3$ )  $\delta$  7.57–6.65 (m, 9H), 4.83 (d, 1H,  $J = 10.0$  Hz), 4.15 (dt, 1H,  $J = 10.0, 9.5$  Hz), 3.27 (s, 3H), 2.88 (dd, 1H,  $J = 11.0, 10.0$  Hz), 2.80 (dd, 1H,  $J = 10.5, 10.0$  Hz), 1.75 (s, 3H), 1.70 (s, 3H);  $^{13}\text{C}$  NMR (75 Hz,  $\text{CDCl}_3$ )  $\delta$  198.8, 170.0, 168.8, 157.0, 142.5, 133.5, 130.6, 128.4, 127.3, 127.0, 126.1, 120.8, 110.2, 105.3, 60.2, 54.1, 46.4, 38.8, 36.9, 29.2, 27.7; HRMS (FAB)  $m/z$  calcd for  $\text{C}_{23}\text{H}_{23}\text{O}_6$  ( $\text{M}+\text{H}$ ) $^+$  395.1489, found 395.1488.

***rac*-(1*R*,2*S*)-1-(2-Methoxybenzoyl)-7,7-dimethyl-2-phenyl-6,8-dioxaspiro[3.5]nonane-5,9-dione (3d) (Table 2, entry 4).**

According to the typical procedure for the ring expansion of **2a** with **1a**, **3d** was prepared from **2a** (74 mg, 0.30 mmol) with **1d** (95 mg, 0.45 mmol) for 6 h. The crude product was purified by column chromatography (silica gel, 9% to 15% EtOAc in hexane) to provide

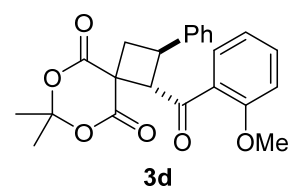

**3d** (103 mg, 87%) as a colorless amorphous: IR (ATR,  $\text{cm}^{-1}$ )  $\nu$  3001, 1735, 1681, 1283, 1256, 1199;  $^1\text{H}$  NMR (500 MHz,  $\text{CDCl}_3$ )  $\delta$  7.50–7.00 (m, 9H), 4.87 (d, 2H,  $J = 10.5$  Hz), 3.56 (s, 3H), 2.91 (m, 2H), 1.77 (s, 3H), 1.74 (s, 3H);  $^{13}\text{C}$  NMR (75 Hz,  $\text{CDCl}_3$ )  $\delta$  196.5, 169.9, 168.2, 159.6, 141.7, 135.7, 129.4, 128.9, 127.6, 127.6, 121.0, 120.7, 111.5, 105.6, 57.1, 54.9, 46.3, 39.0, 38.1, 29.0, 27.9; HRMS (FAB)  $m/z$  calcd for  $\text{C}_{23}\text{H}_{23}\text{O}_6$  ( $\text{M}+\text{H}$ ) $^+$  395.1489, found 395.1483.

***rac*-(1*R*,2*S*)-7,7-Dimethyl-1-(4-nitrobenzoyl)-2-phenyl-6,8-dioxaspiro[3.5]nonane-5,9-dione (3e) (Table 2, entry 5).**

According to the typical procedure for the ring expansion of **2a** with **1a**, **3e** was prepared from **2a** (74 mg, 0.30 mmol) with **1e** (102 mg, 0.45 mmol) for 24 h. The crude product was purified by column chromatography (silica gel, 10% EtOAc in hexane) to

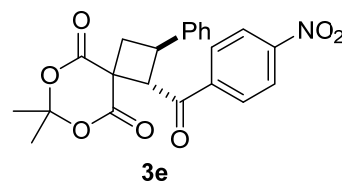

provide **3e** (75 mg, 61%) as a white solid: mp 108.0–110.0  $^{\circ}\text{C}$ ; IR (KBr,  $\text{cm}^{-1}$ )  $\nu$  3003, 1771, 1738, 1696, 1526, 1302, 1202;  $^1\text{H}$  NMR (400 MHz,  $\text{CDCl}_3$ )  $\delta$  7.26–8.11 (m, 9H), 4.88 (d,  $J = 10.1$  Hz,

1H), 4.29 (dt,  $J = 10.1, 9.2$  Hz, 1H), 2.94 (d,  $J = 9.2$  Hz, 2H), 1.80 (s, 3H), 1.76 (s, 3H);  $^{13}\text{C}$  NMR (100 MHz,  $\text{CDCl}_3$ )  $\delta$  195.9, 169.5, 168.1, 150.4, 141.0, 139.4, 129.4, 128.2, 127.6, 123.7, 106.0, 56.8, 46.5, 39.0, 38.5, 29.0, 28.1; HRMS (ESI)  $m/z$  calcd for  $\text{C}_{22}\text{H}_{19}\text{NNaO}_7$  ( $\text{M}+\text{Na}$ ) $^+$  432.1054, found 432.1059.

***rac*-(1*R*,2*S*)-1-(4-Chlorobenzoyl)-7,7-dimethyl-2-phenyl-6,8-dioxaspiro[3.5]nonane-5,9-dione (**3f**) (Table 2, entry 6).**

According to the typical procedure for the ring expansion of **2a** with **1a**, **3f** was prepared from **2a** (74 mg, 0.30 mmol) with **1f** (97 mg, 0.45 mmol) for 5 h. The crude product was purified by column chromatography (silica gel, 10% EtOAc in hexane) to provide **3f**

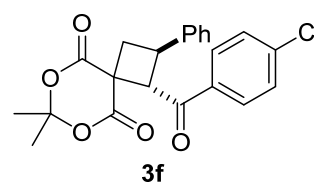

(100 mg, 83%) as a white solid: mp 166.5–168.0 °C; IR (KBr,  $\text{cm}^{-1}$ )  $\nu$  3007, 1771, 1739, 1684, 1302, 1202;  $^1\text{H}$  NMR (400 MHz,  $\text{CDCl}_3$ )  $\delta$  7.58–7.21 (m, 9H), 4.82 (d,  $J = 10.1$  Hz, 1H), 4.30 (dt,  $J = 9.6$  Hz, 10.1 Hz, 1H), 2.91 (d,  $J = 9.6$  Hz, 2H), 1.80 (s, 3H), 1.75 (s, 3H);  $^{13}\text{C}$  NMR (100 MHz,  $\text{CDCl}_3$ )  $\delta$  195.7, 169.9, 168.4, 141.4, 140.0, 132.8, 129.8, 129.0, 128.0, 127.7, 105.9, 57.3, 46.2, 39.3, 38.2, 29.1, 28.1; HRMS (ESI)  $m/z$  calcd for  $\text{C}_{22}\text{H}_{19}\text{ClNaO}_5$  ( $\text{M}+\text{Na}$ ) $^+$  421.0813, found 421.0817.

***rac*-(1*R*,2*S*)-1-Acetyl-7,7-dimethyl-2-phenyl-6,8-dioxaspiro[3.5]nonane-5,9-dione (**3g**) (Table 2, entry 7).**

According to the typical procedure for the ring expansion of **2a** with **1a**, **3g** was prepared from **2a** (74 mg, 0.30 mmol) with **1g** (65 mg, 0.45 mmol) for 24 h. The crude product was purified by column chromatography (silica gel, 10% EtOAc in hexane) to provide **3g** (33 mg, 36%) as a white solid: mp

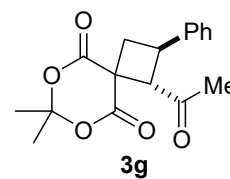

96.0–97.0 °C; IR (KBr,  $\text{cm}^{-1}$ )  $\nu$  3003, 1771, 1739, 1711, 1301, 1202;  $^1\text{H}$  NMR (400 MHz,  $\text{CDCl}_3$ )  $\delta$  7.51–7.26 (m, 5H), 4.19 (m, 1H), 2.84 (m, 1H), 2.76 (m, 2H), 1.99 (s, 3H), 1.87 (s, 3H), 1.75 (s, 3H);  $^{13}\text{C}$  NMR (100 MHz,  $\text{CDCl}_3$ )  $\delta$  204.6, 169.5, 168.8, 141.1, 129.1, 127.0, 105.9, 59.2, 45.7, 39.3, 38.5, 28.9, 28.1, 26.8; HRMS (ESI)  $m/z$  calcd for  $\text{C}_{17}\text{H}_{18}\text{NaO}_5$  ( $\text{M}+\text{Na}$ ) $^+$  325.1046, found 325.1047.

***rac*-(1*R*,2*S*)-Ethyl 7,7-dimethyl-5,9-dioxo-2-phenyl-6,8-dioxaspiro[3.5]nonane-1-carboxylate (**3h**) (Table 2, entry 8).**

According to the typical procedure for the ring expansion of **2a** with **1a**, **3h** was prepared from **2a** (74 mg, 0.30 mmol) with **1h** (67 mg, 0.45 mmol) for 23 h. The crude product was purified by column chromatography (silica gel, 10% EtOAc in hexane) to provide **3h** (53 mg, 53%) as a white solid:

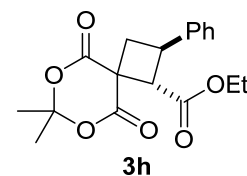

mp 132.5–133.7 °C; IR (KBr,  $\text{cm}^{-1}$ )  $\nu$  2997, 1773, 1743, 1720, 1698, 1303, 1202;  $^1\text{H}$  NMR (400 MHz,  $\text{CDCl}_3$ )  $\delta$  7.43–7.26 (m, 5H), 4.32 (dt,  $J = 10.1, 9.6$  Hz, 1H), 4.15 (m, 3H), 2.87 (dd,  $J = 10.5, 9.6$  Hz, 1H), 2.78 (dd,  $J = 10.5, 10.1$  Hz, 1H), 1.83 (s, 3H), 1.74 (s, 3H);  $^{13}\text{C}$  NMR (100 MHz,  $\text{CDCl}_3$ )  $\delta$  170.0, 169.1, 168.4, 141.4, 128.7, 127.3, 126.9, 105.6, 61.3, 50.3, 46.5, 38.0, 37.6, 29.0, 28.2, 14.0; HRMS (ESI)  $m/z$  calcd for  $\text{C}_{18}\text{H}_{20}\text{NaO}_6$  ( $\text{M}+\text{Na}$ ) $^+$  355.1152, found 355.1155.

***rac*-(1*R*,2*S*)-4-(1-Benzoyl-7,7-dimethyl-5,9-dioxo-6,8-dioxaspiro[3.5]nonan-2-yl)phenyl acetate (**3i**) (Table 3, entry 1).**

According to the typical procedure for the ring expansion of **2a** with **1a**, **3i** was prepared from **2b** (97 mg, 0.30 mmol) with **1a** (81 mg, 0.45 mmol) for 3 h. The crude product was purified by column chromatography (silica gel, 10% EtOAc in hexane) to provide **3i** (81

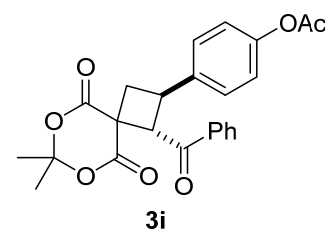

mg, 64%) as a white solid: mp 148.5–149.7 °C; IR (KBr,  $\text{cm}^{-1}$ )  $\nu$  3003, 1766, 1739, 1684, 1304, 1200;  $^1\text{H}$  NMR (400 MHz,  $\text{CDCl}_3$ )  $\delta$  7.49–7.11 (m, 9H), 4.82 (d,  $J = 10.1$  Hz, 1H), 4.33 (dt,  $J = 10.1, 9.2$  Hz, 1H), 2.91 (d,  $J = 9.2$  Hz, 2H), 2.32 (s, 3H), 1.73 (s, 6H);  $^{13}\text{C}$  NMR (100 MHz,  $\text{CDCl}_3$ )  $\delta$  196.7, 170.0, 169.5, 168.2, 150.1, 139.3, 134.6, 133.5, 128.8, 128.6, 128.3, 122.1, 105.8, 57.4, 46.3, 38.4, 38.0, 29.2, 28.0, 21.1; HRMS (ESI)  $m/z$  calcd for  $\text{C}_{24}\text{H}_{23}\text{O}_7$  ( $\text{M}+\text{H}$ ) $^+$  423.1438, found 423.1437.

***rac*-(1*R*,2*S*)-1-Benzoyl-7,7-dimethyl-2-(4-methylphenyl)-6,8-dioxaspiro[3.5]nonane-5,9-dione (**3j**) (Table 3, entry 2).**

According to the typical procedure for the ring expansion of **2a** with **1a**, **3j** was prepared from **2c** (83 mg, 0.30 mmol) with **1a** (81 mg, 0.45 mmol) for 6 h. The crude product was purified by column chromatography (silica gel, 10% EtOAc in hexane) to provide **3j** (84

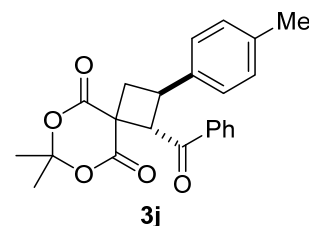

mg, 74%) as a white solid: mp 181.5–183.0 °C; IR (KBr,  $\text{cm}^{-1}$ )  $\nu$  3003, 1771, 1739, 1685, 1301, 1203;  $^1\text{H}$  NMR (400 MHz,  $\text{CDCl}_3$ )  $\delta$  7.48–7.20 (m, 9H), 4.83 (d,  $J = 9.6$  Hz, 1H), 4.27 (t,  $J = 9.6$

Hz, 1H), 2.88 (d,  $J = 9.6$  Hz, 2H), 1.76 (s, 3H), 1.73 (s, 3H);  $^{13}\text{C}$  NMR (100 MHz,  $\text{CDCl}_3$ )  $\delta$  197.0, 170.1, 168.5, 138.7, 137.5, 134.6, 133.4, 129.6, 128.5, 128.4, 127.6, 105.7, 57.7, 46.3, 38.9, 38.2, 29.1, 28.0, 21.1; HRMS (ESI)  $m/z$  calcd for  $\text{C}_{23}\text{H}_{23}\text{O}_5$  ( $\text{M}+\text{H}$ ) $^+$  379.1540, found 379.1540.

***rac*-(1*R*,2*S*)-1-Benzoyl-2-(4-bromophenyl)-7,7-dimethyl-6,8-dioxaspiro[3.5]nonane-5,9-dione (3k) (Table 3, entry 3).**

According to the typical procedure for the ring expansion of **2a** with **1a**, **3k** was prepared from **2d** (90 mg, 0.30 mmol) with **1a** (81 mg, 0.45 mmol) for 6 h. The crude product was purified by column chromatography (silica gel, 10% EtOAc in hexane) to provide **3k** (91

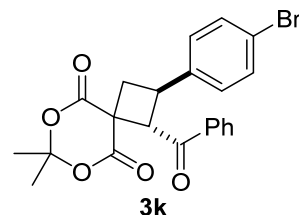

mg, 80%) as a white solid: mp 163.0–164.0 °C; IR (KBr,  $\text{cm}^{-1}$ )  $\nu$  2942, 1772, 1738, 1685, 1307, 1298, 1203;  $^1\text{H}$  NMR (400 MHz,  $\text{CDCl}_3$ )  $\delta$  7.50–6.87 (m, 9H), 4.79 (d,  $J = 10.1$  Hz, 1H), 4.30 (q,  $J = 9.6$  Hz, 1H), 2.89 (m, 2H), 1.73 (s, 6H);  $^{13}\text{C}$  NMR (100 MHz,  $\text{CDCl}_3$ )  $\delta$  196.6, 169.9, 168.1, 140.7, 134.6, 133.6, 132.0, 129.4, 128.7, 128.2, 121.6, 105.9, 56.9, 46.4, 38.2, 37.8, 29.1, 28.0; HRMS (ESI)  $m/z$  calcd for  $\text{C}_{22}\text{H}_{20}\text{BrO}_5$  ( $\text{M}+\text{H}$ ) $^+$  443.0489, found 443.0489.

***rac*-(1*R*,2*S*)-1-Benzoyl-2-(3-methoxyphenyl)-7,7-dimethyl-6,8-dioxaspiro[3.5]nonane-5,9-dione (3l) (Table 3, entry 4).**

According to the typical procedure for the ring expansion of **2a** with **1a**, **3l** was prepared from **2e** (88 mg, 0.30 mmol) with **1a** (81 mg, 0.45 mmol) for 12 h. The crude product was purified by column chromatography (silica gel, 10% EtOAc in hexane) to provide **3l**

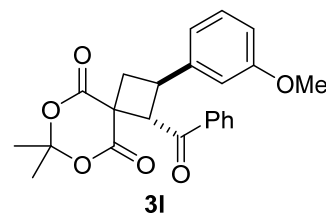

(81 mg, 69%) as a white solid: mp 116.1–118.0 °C; IR (KBr,  $\text{cm}^{-1}$ )  $\nu$  2924, 1771, 1738, 1684, 1303, 1203;  $^1\text{H}$  NMR (400 MHz,  $\text{CDCl}_3$ )  $\delta$  7.49–7.11 (m, 9H), 4.82 (d,  $J = 10.1$  Hz, 1H), 4.33 (dt,  $J = 9.2$  Hz, 10.1 Hz 1H), 2.91 (d,  $J = 9.2$  Hz, 2H), 2.32 (s, 3H), 1.73 (s, 3H), 1.73 (s, 3H);  $^{13}\text{C}$  NMR (100 MHz,  $\text{CDCl}_3$ )  $\delta$  196.9, 169.9, 168.4, 160.0, 143.3, 134.6, 133.4, 130.0, 128.5, 128.4, 120.0, 113.3, 105.8, 57.2, 46.4, 39.2, 37.9, 29.1, 28.0; HRMS (ESI)  $m/z$  calcd for  $\text{C}_{23}\text{H}_{23}\text{O}_6$  ( $\text{M}+\text{H}$ ) $^+$  395.1489, found 395.1489.

***rac*-(1*R*,2*S*)-1-Benzoyl-7,7-dimethyl-2-(naphthalen-2-yl)-6,8-dioxaspiro[3.5]nonane-5,9-dione (3m) (Table 3, entry 5).**

According to the typical procedure for the ring expansion of **2a** with **1a**, **3m** was prepared from **2f** (94 mg, 0.30 mmol) with **1a** (81 mg, 0.45 mmol) for 48 h. The crude product was purified by column chromatography (silica gel, 10% EtOAc in hexane) to provide **3m**

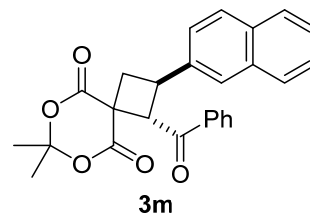

(99 mg, 80%) as a white solid: mp 212.5–214.0 °C; IR (KBr,  $\text{cm}^{-1}$ )  $\nu$  3007, 1772, 1736, 1684, 1299, 1201;  $^1\text{H}$  NMR (400 MHz,  $\text{CDCl}_3$ )  $\delta$  7.92–7.18 (m, 12H), 4.97 (d,  $J = 10.1$  Hz, 1H), 4.50 (dt,  $J = 9.6$  Hz, 10.1 Hz 1H), 3.03 (t,  $J = 10.1$  Hz, 1H), 2.97 (t,  $J = 9.6$  Hz, 1H) 1.77 (s, 3H), 1.75 (s, 3H);  $^{13}\text{C}$  NMR (100 MHz,  $\text{CDCl}_3$ )  $\delta$  196.9, 170.1, 168.4, 138.9, 134.6, 133.4, 133.3, 132.8, 129.0, 128.5, 128.4, 127.9, 127.7, 126.7, 126.4, 126.1, 125.3, 105.8, 57.2, 46.5, 39.3, 38.0, 29.2, 28.0; HRMS (ESI)  $m/z$  calcd for  $\text{C}_{26}\text{H}_{23}\text{O}_5$  ( $\text{M}+\text{H}$ ) $^+$  415.1540, found 415.1539.

***rac*-(1*R*,2*R*)-1-Benzoyl-7,7-dimethyl-2-vinyl-6,8-dioxaspiro[3.5]nonane-5,9-dione (3n) (Table 3, entry 6).**

According to the typical procedure for the ring expansion of **2a** with **1a**, **3n** was prepared from **2g** (59 mg, 0.30 mmol) with **1a** (81 mg, 0.45 mmol) for 24 h. The crude product was purified by column chromatography (silica gel, 10% EtOAc in hexane) to provide **3n** (61 mg, 68%) as a white solid: mp

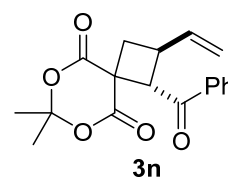

105.0–107.0 °C; IR (KBr,  $\text{cm}^{-1}$ )  $\nu$  3001, 1772, 1740, 1684, 1295, 1204;  $^1\text{H}$  NMR (400 MHz,  $\text{CDCl}_3$ )  $\delta$  7.76–7.27 (m, 5H), 6.12 (m, 1H), 5.19–5.26 (m, 2H), 4.54 (d,  $J = 9.6$  Hz, 1H), 3.82 (m, 1H), 2.69 (dd,  $J = 11.0, 10.1$  Hz, 1H), 2.59 (dd,  $J = 10.5, 9.6$  Hz, 1H), 1.72 (s, 3H), 1.70 (s, 3H);  $^{13}\text{C}$  NMR (100 MHz,  $\text{CDCl}_3$ )  $\delta$  196.9, 169.7 168.2, 139.2, 134.8, 133.5, 128.6, 128.5, 117.9, 105.6, 55.4, 46.8, 37.7, 36.0, 29.1, 28.0; HRMS (ESI)  $m/z$  calcd for  $\text{C}_{18}\text{H}_{19}\text{O}_5$  ( $\text{M}+\text{H}$ ) $^+$  315.1227, found 315.1226.

**1-Benzoyl-7,7-dimethyl-6,8-dioxaspiro[3.5]nonane-5,9-dione (3o) (Table 3, entry 7).**

According to the typical procedure for the ring expansion of **2a** with **1a**, **3o** was prepared from **2h** (51 mg, 0.30 mmol) with **1a** (81 mg, 0.45 mmol) for 24 h. The crude product was purified by column chromatography (silica gel, 10% EtOAc in hexane) to provide **3o** (22 mg, 26%) as a pale yellow oil; IR

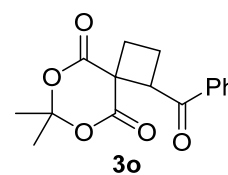

(KBr,  $\text{cm}^{-1}$ )  $\nu$  3003, 1771, 1739, 1683, 1305, 1284, 1203;  $^1\text{H}$  NMR (400 MHz,  $\text{CDCl}_3$ )  $\delta$  7.77–7.26 (m, 5H), 4.75 (dd,  $J = 10.5, 9.6$  Hz, 1H), 3.02 (m, 1H), 2.78 (m, 1H), 2.66 (m, 1H), 2.48 (m,

1H), 1.78 (s, 3H), 1.71 (s, 3H);  $^{13}\text{C}$  NMR (100 MHz,  $\text{CDCl}_3$ )  $\delta$  197.0, 169.7, 168.4, 134.4, 133.6, 128.8, 128.2, 105.5, 58.1, 49.3, 30.3, 29.1, 28.0, 27.8, 23.0; HRMS (ESI)  $m/z$  calcd for  $\text{C}_{16}\text{H}_{16}\text{NaO}_5$  ( $\text{M}+\text{Na}$ ) $^+$  311.0890, found 311.0890.

***rac*-(1*R*,2*S*)-1-Benzoyl-6,8-dimethyl-2-phenyl-6,8-diazaspiro[3.5]nonane-5,7,9-trione (7a) and *rac*-(6*R*,7*S*)-7-benzoyl-1,3-dimethyl-6-phenyl-6,7-dihydro-4*H*-pyrano[2,3-*d*]pyrimidine-2,4(3*H*,5*H*)-dione (8a) (Scheme 4).**

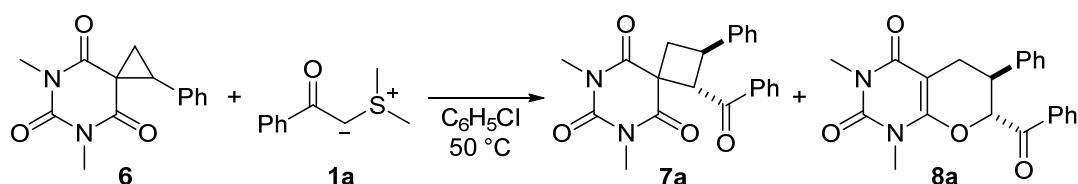

Sulfonium ylide **1a** (54 mg, 0.30 mmol) was added to a solution of 5,7-dimethyl-1-phenyl-5,7-diazaspiro[2.5]octane-4,6,8-trione (**6**) (52 mg, 0.20 mmol) in  $\text{C}_6\text{H}_5\text{Cl}$  (1.0 mL) at room temperature. After stirring at  $50\text{ }^\circ\text{C}$  for 4 h, the reaction was cooled to room temperature. Evaporation in vacuo furnished the crude product, which was purified by column chromatography (silica gel, 10% EtOAc in hexane) to provide **7a** (48 mg, 64%) as a white solid and **8a** (6 mg, 8%) as a pale yellow solid.

**7a**: mp  $148.0\text{--}148.5\text{ }^\circ\text{C}$ ; IR (film,  $\text{cm}^{-1}$ )  $\nu$  3020, 1744, 1674, 1457, 1421, 1383, 1215;  $^1\text{H}$  NMR (400 MHz,  $\text{CDCl}_3$ )  $\delta$  7.51 (d,  $J = 6.9$  Hz, 2H), 7.48–7.39 (m, 5H), 7.32 (tt,  $J = 7.3, 1.6$  Hz, 1H), 7.23 (t,  $J = 8.0$  Hz, 2H), 4.70 (d,  $J = 9.6$  Hz, 1H), 4.31 (q,  $J = 9.6$  Hz, 1H), 3.36 (s, 3H), 3.24 (s, 3H), 2.96 (t,  $J = 10.5$  Hz, 1H), 2.80 (dd,  $J = 10.8, 9.4$  Hz, 1H);  $^{13}\text{C}$  NMR (100 MHz,  $\text{CDCl}_3$ )  $\delta$  197.3, 171.0, 170.6, 150.9, 142.2, 134.8, 133.5, 128.9, 128.4, 128.2, 127.8, 127.6, 60.5, 49.4, 38.9, 36.0, 28.9, 28.6; HRMS (ESI)  $m/z$  calcd for  $\text{C}_{22}\text{H}_{20}\text{N}_2\text{NaO}_4$  ( $\text{M}+\text{Na}$ ) $^+$  399.1315, found 399.1317.

**8a**: mp  $180.5\text{--}181.0\text{ }^\circ\text{C}$ ; IR (film,  $\text{cm}^{-1}$ )  $\nu$  3026, 2925, 1744, 1674, 1651, 1453, 1382, 1223;  $^1\text{H}$  NMR (400 MHz,  $\text{CDCl}_3$ )  $\delta$  7.90 (d,  $J = 6.9$  Hz, 2H), 7.63 (t,  $J = 7.6$  Hz, 1H), 7.50 (t,  $J = 7.8$  Hz, 2H), 7.31–7.24 (m, 5H), 5.87 (d,  $J = 4.6$  Hz, 1H), 3.65 (q,  $J = 5.6$  Hz, 1H), 3.38 (s, 3H), 3.37 (s, 3H), 2.80 (dd,  $J = 16.7, 5.3$  Hz, 1H), 2.67 (dd,  $J = 16.7, 6.4$  Hz, 1H);  $^{13}\text{C}$  NMR (100 MHz,  $\text{CDCl}_3$ )  $\delta$  193.5, 162.7, 155.1, 150.9, 139.5, 134.3, 133.8, 129.1, 129.0, 128.5, 127.6, 127.3, 85.8, 82.1, 38.3, 28.8, 28.0, 22.0; HRMS (ESI)  $m/z$  calcd for  $\text{C}_{22}\text{H}_{21}\text{N}_2\text{O}_4$  ( $\text{M}+\text{H}$ ) $^+$  377.1496, found 377.1497.

*rac*-(1*R*,2*S*)-1-Benzoyl-7,7-dimethyl-2-phenyl-6,8-dioxaspiro[3.5]nonane-5,9-dione (**7b**) and *rac*-(2*R*,3*S*)-ethyl 6,8-dimethyl-5,7-dioxo-2-phenyl-2,3-dihydro-4*H*-pyrano[5,6-*d*]pyrimidine-2-carboxylate (**8b**) (Scheme 4).

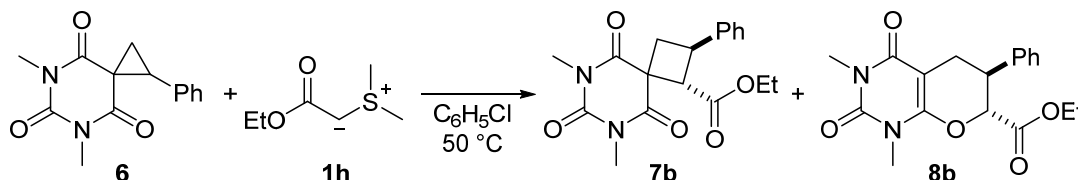

Sulfonium ylide **1h** (67 mg, 0.45 mmol) was added to a solution of **6** (77 mg, 0.30 mmol) in  $C_6H_5Cl$  (1.5 mL) at room temperature. After stirring at  $50\text{ }^\circ C$  for 2 h, the reaction was cooled to room temperature. Evaporation in vacuo furnished the crude product, which was purified by column chromatography (silica gel, 25% EtOAc in hexane) to provide **7b** (85 mg, 83%) as a white solid and **8b** (9 mg, 9%) as a white solid.

**7b**: mp  $80.5\text{--}81.0\text{ }^\circ C$ ; IR (film,  $cm^{-1}$ )  $\nu$  3018, 1749, 1703, 1651, 1489, 1216, 1183;  $^1H$  NMR (400 MHz,  $CDCl_3$ )  $\delta$  7.45 (d,  $J = 7.3$  Hz, 2H), 7.37 (t,  $J = 7.5$  Hz, 2H), 7.37 (m, 1H), 4.28 (q,  $J = 9.8$  Hz, 1H), 4.11 (qd,  $J = 7.2, 2.2$  Hz, 2H), 4.00 (d,  $J = 10.0$  Hz, 1H), 3.37 (s, 3H), 3.36 (s, 3H), 2.84–2.73 (m, 2H), 1.19 (t,  $J = 7.1$  Hz, 3H);  $^{13}C$  NMR (100 MHz,  $CDCl_3$ )  $\delta$  170.4, 170.3, 170.2, 151.1, 142.0, 128.6, 127.2, 127.1, 61.2, 52.9, 49.2, 37.9, 35.9, 29.1, 28.7, 14.1; HRMS (ESI)  $m/z$  calcd for  $C_{18}H_{20}N_2NaO_5$  ( $M+Na$ ) $^+$  367.1264, found 367.1269.

**8b**: mp  $146.0\text{--}147.0\text{ }^\circ C$ ; IR (film,  $cm^{-1}$ )  $\nu$  3028, 2960, 1740, 1677, 1456, 1422, 1383, 1219;  $^1H$  NMR (400 MHz,  $CDCl_3$ )  $\delta$  7.36–7.28 (m, 3H), 7.22 (dd,  $J = 5.3, 3.0$  Hz, 2H), 4.90 (d,  $J = 6.0$  Hz, 1H), 4.17–4.09 (m, 2H), 3.50 (q,  $J = 6.3$  Hz, 1H), 3.39 (s, 3H), 3.36 (s, 3H), 2.78 (dd,  $J = 6.4, 3.2$  Hz, 2H), 1.11 (t,  $J = 7.3$  Hz, 3H);  $^{13}C$  NMR (100 MHz,  $CDCl_3$ )  $\delta$  167.8, 162.7, 154.8, 150.9, 138.8, 128.9, 127.7, 127.4, 86.4, 80.4, 62.1, 39.2, 28.8, 28.1, 22.7, 13.8; HRMS (ESI)  $m/z$  calcd for  $C_{18}H_{21}N_2O_5$  ( $M+H$ ) $^+$  345.1445, found 345.1447.

### III. Conversion of spirocyclopropane **3a** into cyclobutane **4** (Scheme 3)

*rac*-(1*R*,2*S*)-Dimethyl 2-benzoyl-3-phenylcyclobutane-1,1-dicarboxylate (**4**).

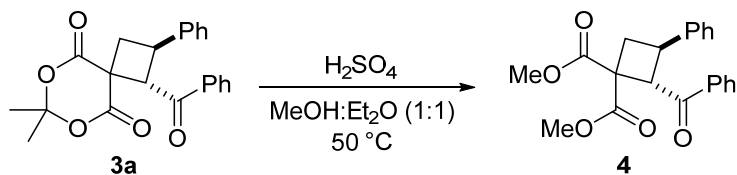

conc.  $\text{H}_2\text{SO}_4$  (0.023 mL, 0.45 mmol) was added to a solution of **3a** (109 mg, 0.30 mmol) in  $\text{Et}_2\text{O}/\text{MeOH}$  (1:1, 1.5 mL) at room temperature. After stirring at 50 °C for 24 h, the reaction mixture was cooled to room temperature and diluted with  $\text{Et}_2\text{O}$  (10 mL). The resulting mixture was washed with saturated aqueous  $\text{NaHCO}_3$  (5 mL) and brine (10 mL), and dried over anhydrous  $\text{MgSO}_4$ . Filtration and evaporation in vacuo furnished the crude product, which was purified by column chromatography (silica gel, 10%  $\text{EtOAc}$  in hexane) to provide **4** (87 mg, 82%) as a pale yellow oil; IR (film,  $\text{cm}^{-1}$ )  $\nu$  2952, 1734, 1677, 1273, 1165;  $^1\text{H}$  NMR (400 MHz,  $\text{CDCl}_3$ )  $\delta$  7.99–7.20 (m, 10H), 4.84 (d,  $J = 10.1$  Hz, 1H), 4.19 (dt,  $J = 9.1$  Hz, 10.1 Hz, 1H), 3.80 (s, 3H), 3.59 (s, 3H), 3.19 (dd,  $J = 11.5, 9.1$  Hz, 1H), 2.49 (dd,  $J = 11.5, 10.1$  Hz, 1H);  $^{13}\text{C}$  NMR (100 MHz,  $\text{CDCl}_3$ )  $\delta$  196.9, 171.2, 169.2, 142.1, 136.2, 133.3, 128.6, 128.6, 128.5, 126.9, 126.8, 53.7, 53.0, 52.8, 52.6, 36.4, 33.4; HRMS (ESI)  $m/z$  calcd for  $\text{C}_{21}\text{H}_{20}\text{O}_5$  ( $\text{M}+\text{H}$ ) $^+$  353.1384, found 353.1382.



**References**

1. P. Gopinath and S. Chandrasekaran, *J. Org. Chem.*, 2011, **76**, 700–703.
2. H. Nambu, N. Ono, W. Hirota, M. Fukumoto and T. Yakura, *Chem. Pharm. Bull.*, 2016, **64**, 1763–1768.
3. H. Nambu, Y. Onuki, N. Ono, K. Tsuge and T. Yakura, *Chem. Commun.*, 2019, **55**, 6539–6542.
4. S. J. Sabounchei, A. Yousefi, M. Ahmadianpoor, A. Hashemi, M. Bayat, A. Sedghi, F. A. Bagherjeri, and R. W. Gable, *Polyhedron*, 2016, **117**, 273–282.
5. S. K. Pagire, N. Kumagai, and M. Shibasaki, *ACS Catal.*, 2021, **11**, 11597–11606.
6. Y. R. Lee and J. H. Choi, *Bull. Korean Chem. Soc.*, 2006, **27**, 503–507.
7. C. Guarino, Y. Hamon, C. Croix, A.-S. Lamort, S. Dallet-Choisy, S. Marchand-Adam, A. Lesner, T. Baranek, M.-C. Viaud-Massuard, C. Lauritzen, J. Pedersen, N. Heuzé-Vourc'h, M. Si-Tahar, E. Firathi, D. E. Jenne, F. Gauthier, M. S. Horwitz, N. Borregaard and B. Korkmaz, *Biochem. Pharmacol.*, 2017, **131**, 52–67.
8. a) S. Danishefsky and R. K. Singh, *J. Org. Chem.*, 1975, **40**, 3807–3808; b) B. M. Trost, P. J. Morris and S. J. Sprague, *J. Am. Chem. Soc.*, 2012, **134**, 17823–17831.
9. a) X. Wang and Y. R. Lee, *Bull. Korean Chem. Soc.*, 2013, **34**, 1735–1740; b) P. Qian, B. Du, R. Song, X. Wu, H. Mei, J. Han and Y. Pan, *J. Org. Chem.*, 2016, **81**, 6546–6553.

C:\Users\laboc\_students\Documents\NMR\onaki\C%<sup>13</sup>C\Ph-cyclopropane\Meld-1-1-1.als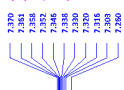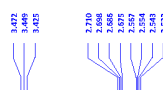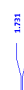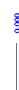

DFILE \_Ph-cyclopropane\Meld-1-1-1.als  
COMINT single\_pulse  
DATIM 2013-05-10 20:05:29  
OBNUC 1H  
EXMOD proton\_bpp  
OBFRQ 395.76 MHz  
OBSET 4.15 KHz  
OBFIN 7.25 Hz  
POINT 13107  
FREQU 6002.40 Hz  
SCANS 6  
AQCTM 2.1817 sec  
PD 5.0000 sec  
PWI 5.75 usec  
BNUC 1H  
CTEMP 22.3 c  
SLVNT CDCl3  
ESREF 0.00 ppm  
BF 0.10 Hz  
RGAIN 35

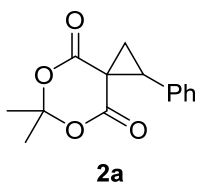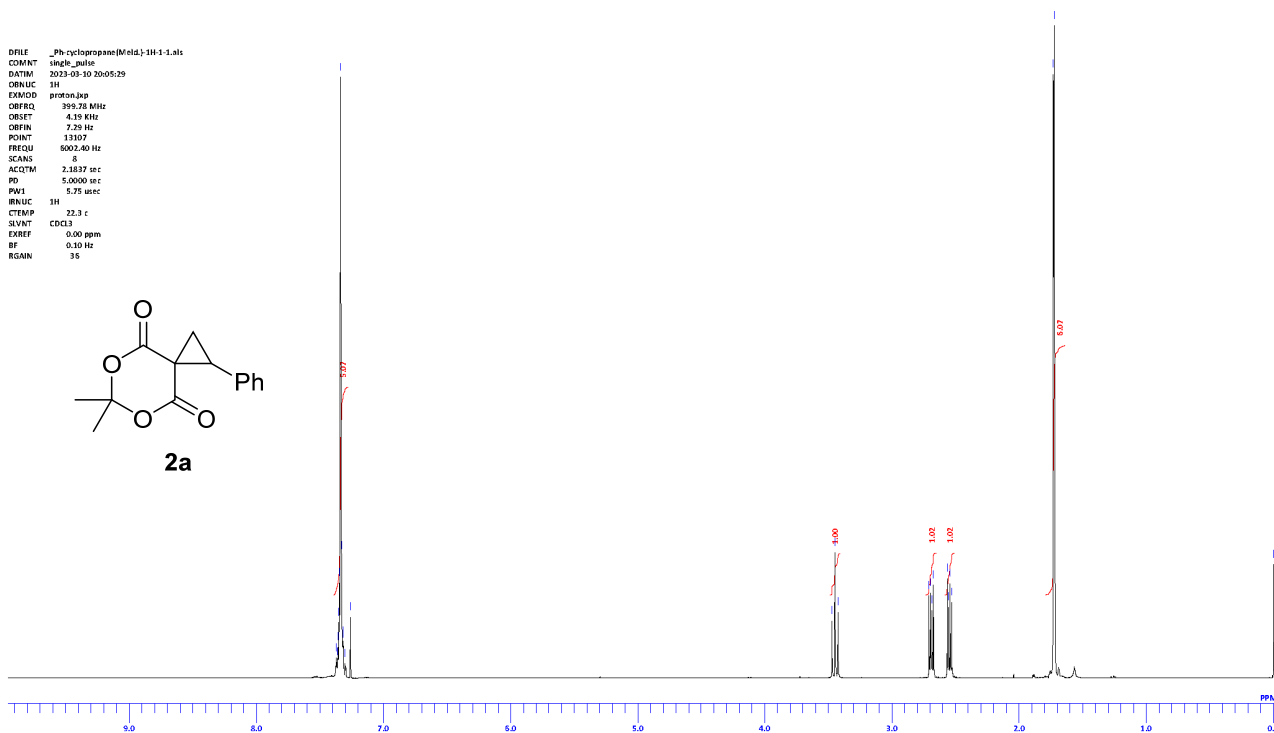C:\Users\laboc\_students\Documents\NMR\onaki\C%<sup>13</sup>C\Ph-cyclopropane\Meld-1-1-1.als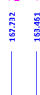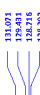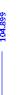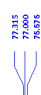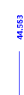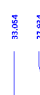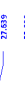

DFILE \_Ph-cyclopropane\Meld-1-1-1.als  
COMINT single\_pulse decoupled gated NDE  
DATIM 2013-05-10 20:07:47  
OBNUC 13C  
EXMOD carbon\_bpp  
OBFRQ 100.63 MHz  
OBSET 5.35 KHz  
OBFIN 5.65 Hz  
POINT 29214  
FREQU 25125.63 Hz  
SCANS 251  
AQCTM 1.0613 sec  
PD 2.0000 sec  
PWI 3.67 usec  
BNUC 13C  
CTEMP 22.4 c  
SLVNT CDCl3  
ESREF 77.00 ppm  
BF 0.10 Hz  
RGAIN 56

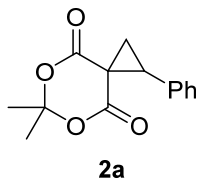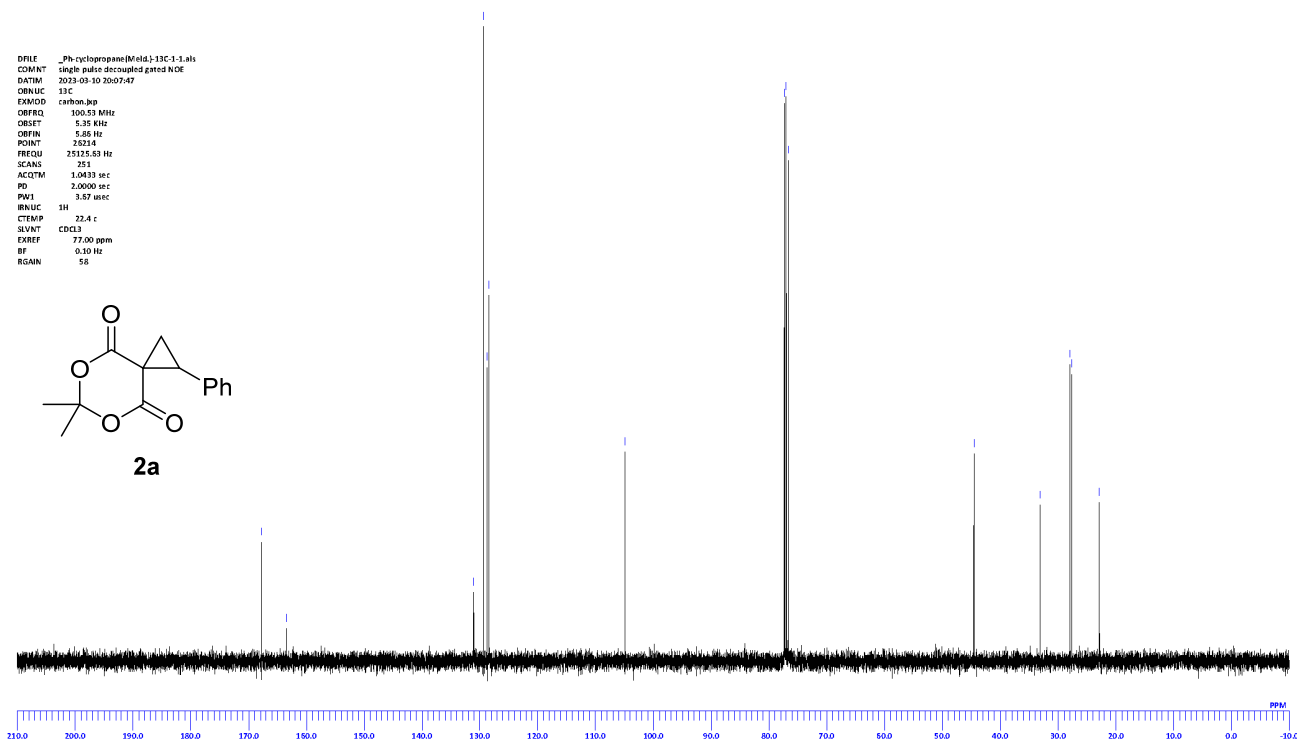

C:\Users\labo\_student1\Documents\NMR\onuki\C%<sub>4</sub>F%<sub>1</sub>@\*C\pOAcPh-cyclopropane[Meld]-1H-1-1.a1s

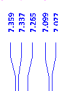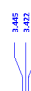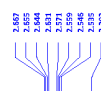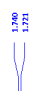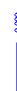

DRIFLE \_pOAcPh-cyclopropane[Meld]-1H-1-1.a1s  
COMINT single\_pulse  
DATIM 2023-09-10 20:28:03  
ORNUC 1H  
EXMDD proton.jpg  
ORFRQ 399.76 MHz  
ORSET 4.19 kHz  
ORFIN 7.29 Hz  
POINT 13107  
FREQU 5002.80 Hz  
SCANS 8  
ACQTM 2.1837 sec  
PD 5.0000 sec  
PWI 5.75 usec  
ORNUC 1H  
CTEMP 22.2 c  
SVINT CDCl3  
EXREF 0.00 ppm  
BF 0.10 Hz  
RGAIN 34

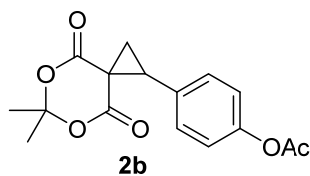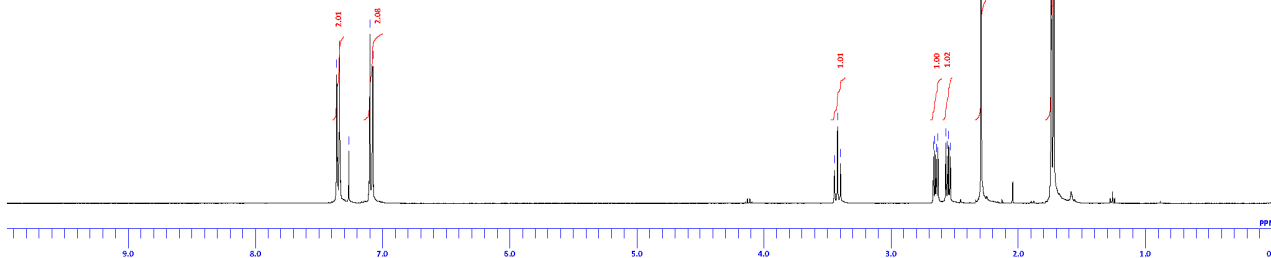

C:\Users\labo\_student1\Documents\NMR\onuki\C%<sub>4</sub>F%<sub>1</sub>@\*C\pOAcPh-cyclopropane[Meld]-13C-1-1.a1s

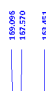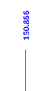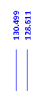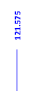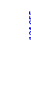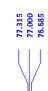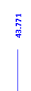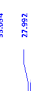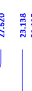

DRIFLE \_pOAcPh-cyclopropane[Meld]-13C-1-1.a1s  
COMINT single\_pulse decoupled gated NDE  
DATIM 2023-09-10 20:28:03  
ORNUC 13C  
EXMDD carbon.jpg  
ORFRQ 100.53 MHz  
ORSET 5.35 kHz  
ORFIN 5.85 Hz  
POINT 25214  
FREQU 25125.53 Hz  
SCANS 218  
ACQTM 1.0433 sec  
PD 2.0000 sec  
PWI 3.67 usec  
ORNUC 13C  
CTEMP 22.4 c  
SVINT CDCl3  
EXREF 77.00 ppm  
BF 0.10 Hz  
RGAIN 58

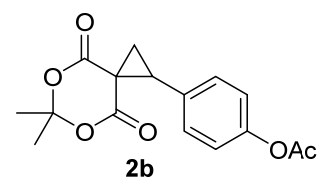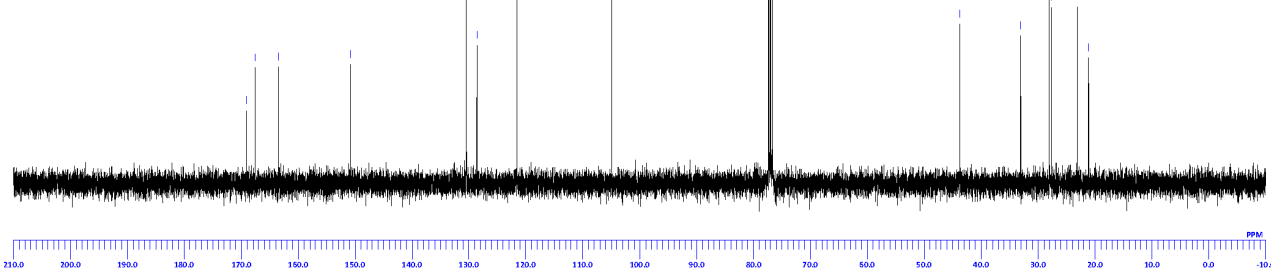



C:\Users\liboc\_students\Documents\NMR\asio\\*\_1-p(cyclopropane\_pBr cyclopropane\_1H-1-1.als

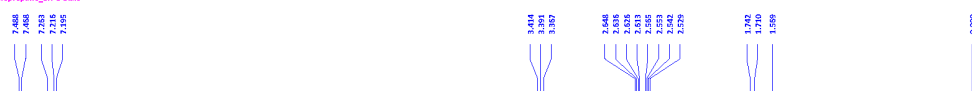

DFILE \_pBr cyclopropane\_1H-1-1.als  
 CDMNT single\_pulse  
 DATIM 2022-10-04 18:17:54  
 OBNUC 1H  
 EXMGO proton\_jpg  
 OBFQ 395.76 MHz  
 OBSET 4.19 KHz  
 OBFN 7.29 Hz  
 POINT 13307  
 FREQU 6002.40 Hz  
 SCANS 8  
 ACQTM 2.1637 sec  
 PD 5.0000 sec  
 PWT 5.75 usec  
 RNUC 1H  
 CTEMP 23.3 c  
 SOLVT CDCl3  
 EXREF 0.00 ppm  
 BF 0.12 Hz  
 RGAIN 35

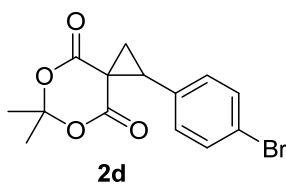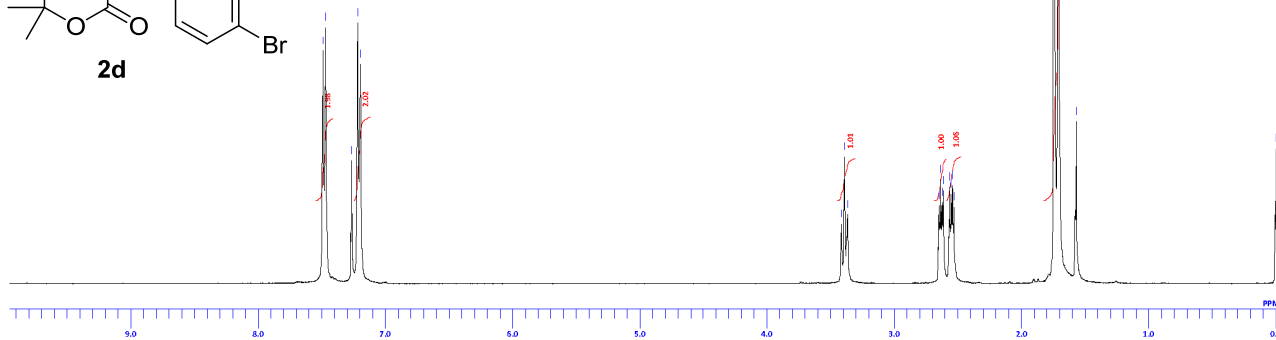

C:\Users\liboc\_students\Documents\NMR\asio\\*\_1-p(cyclopropane\_pBr cyclopropane\_13C-1-1.als

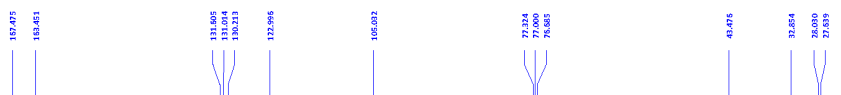

DFILE \_pBr cyclopropane\_13C-1-1.als  
 CDMNT single multi decoupled gated NDE  
 DATIM 2022-10-04 18:25:49  
 OBNUC 13 C  
 EXMGO carbon\_jpg  
 OBFQ 100.63 MHz  
 OBSET 5.35 KHz  
 OBFN 5.85 Hz  
 POINT 62414  
 FREQU 25125.53 Hz  
 SCANS 224  
 ACQTM 1.0433 sec  
 PD 3.0000 sec  
 PWT 3.57 usec  
 RNUC 1H  
 CTEMP 23.7 c  
 SOLVT CDCl3  
 EXREF 77.00 ppm  
 BF 0.12 Hz  
 RGAIN 55

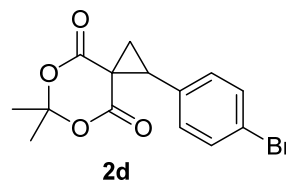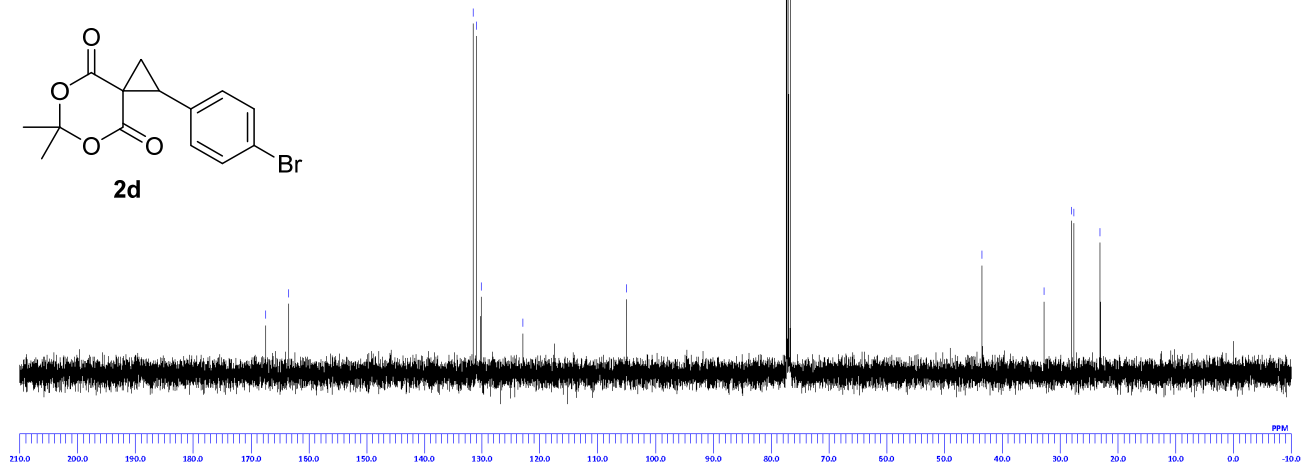

C:\Users\labo\_student\Documents\NMR\iso\\*\_4-PI\cyclopropane\_mOMe\cyclopropane\_1H-1.1.als

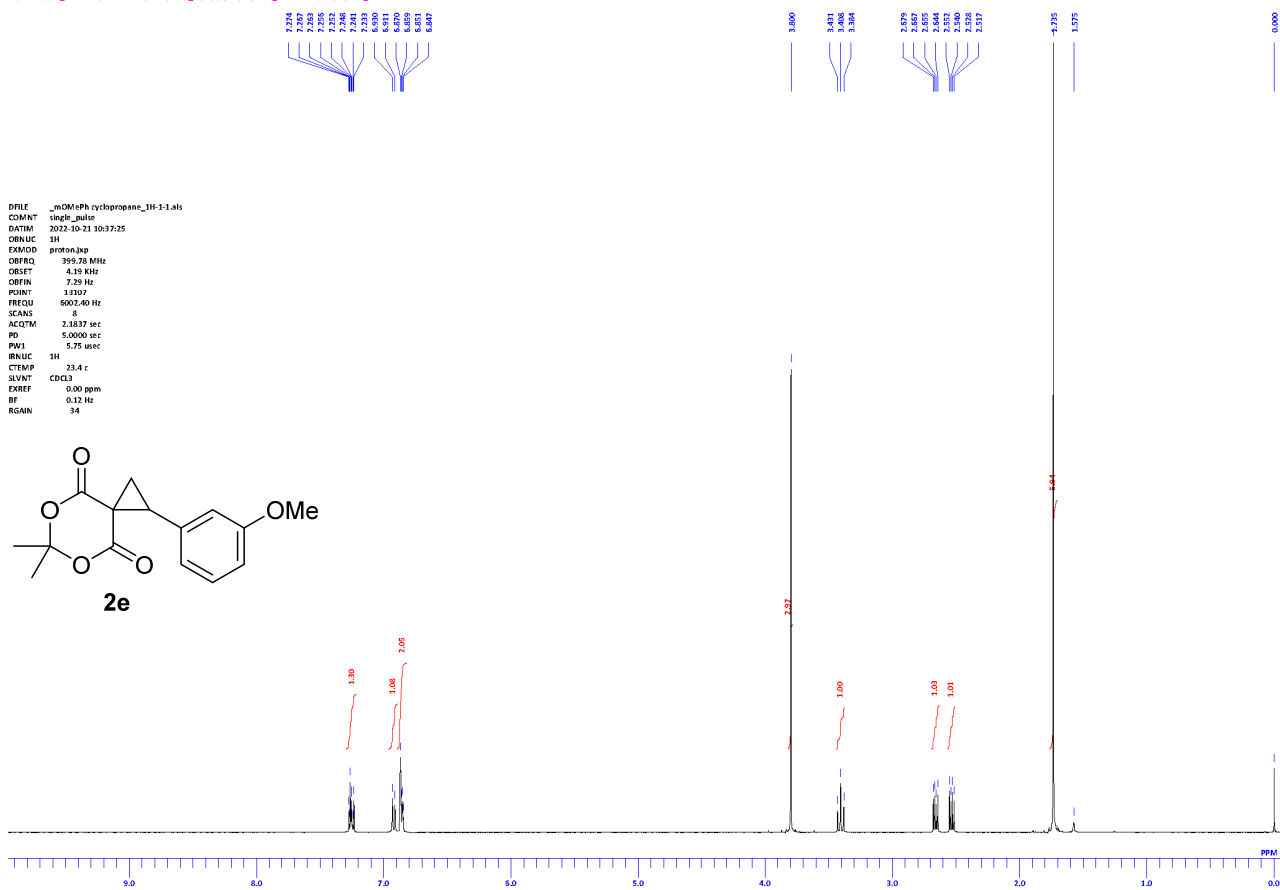

C:\Users\labo\_student\Documents\NMR\iso\\*\_4-PI\cyclopropane\_mOMe\cyclopropane\_13C-1.1.als

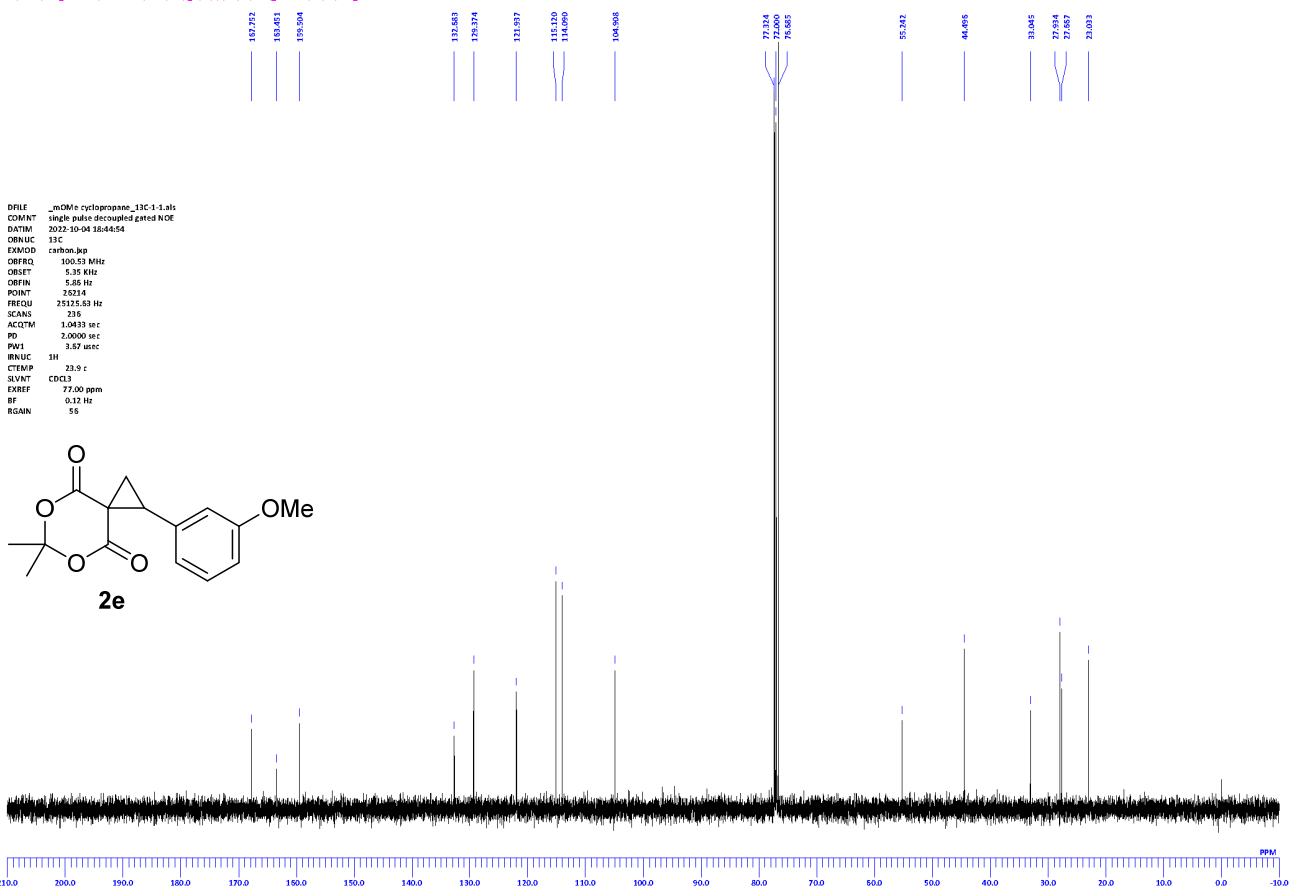



C:\Users\labo\_student\Documents\NMR\ss\1-g-1-cyclopropane\_vinylcyclopropane\_1H-1-1.als

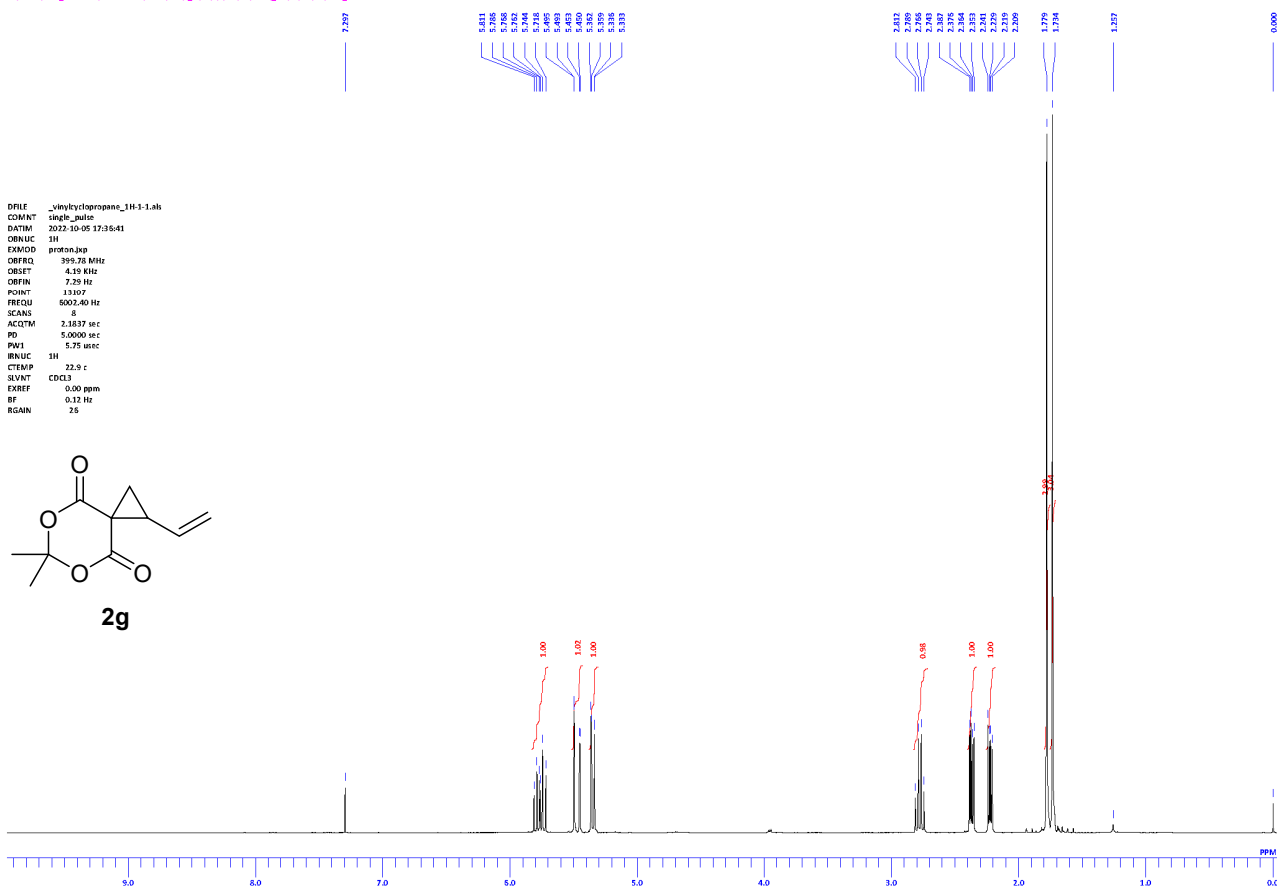

C:\Users\labo\_student\Documents\NMR\ss\1-g-1-cyclopropane\_vinylcyclopropane\_13C-1-1.als

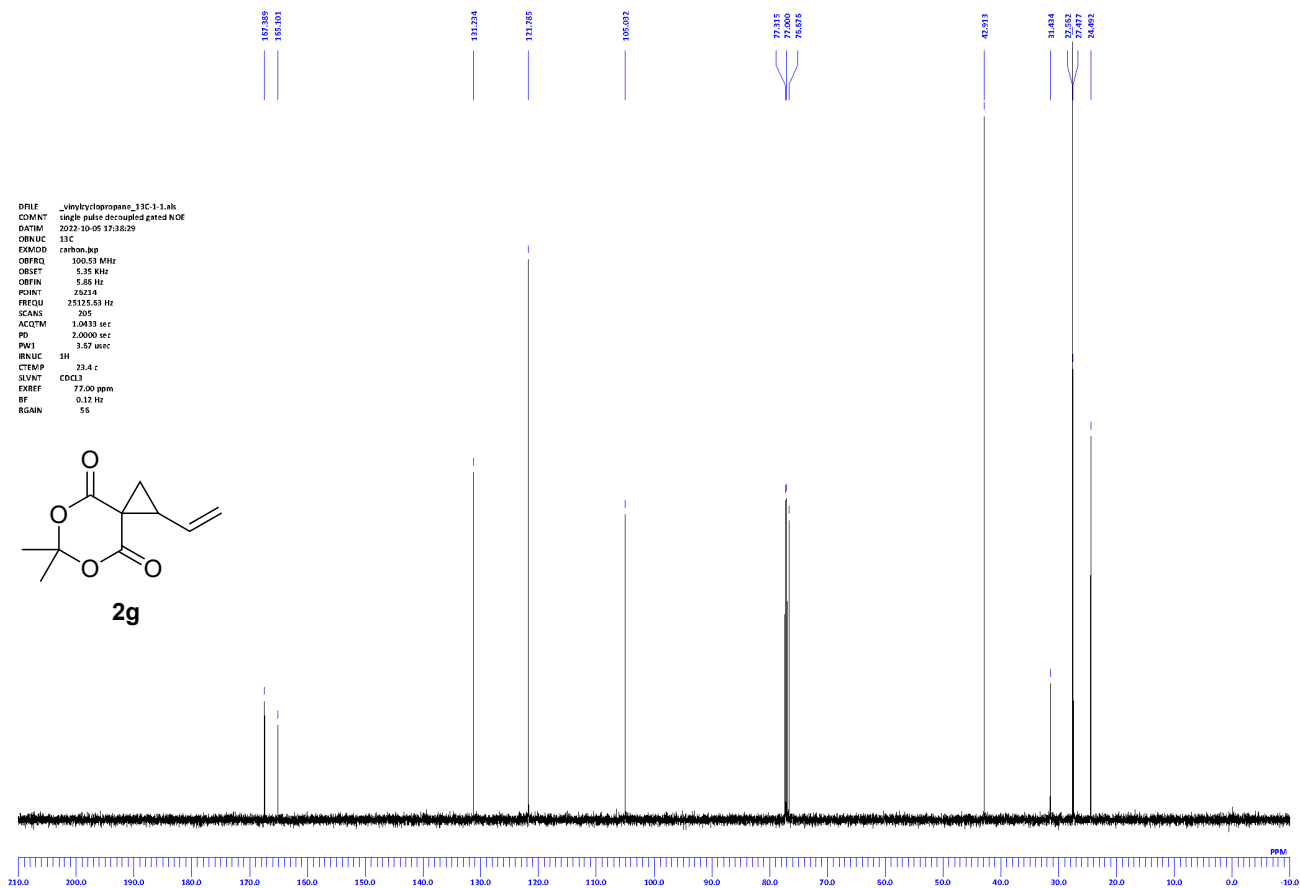



C:\Users\labor\_students\Documents\NMR\1a\1\_4-p-cyclopropane\_1H-1-1.ah

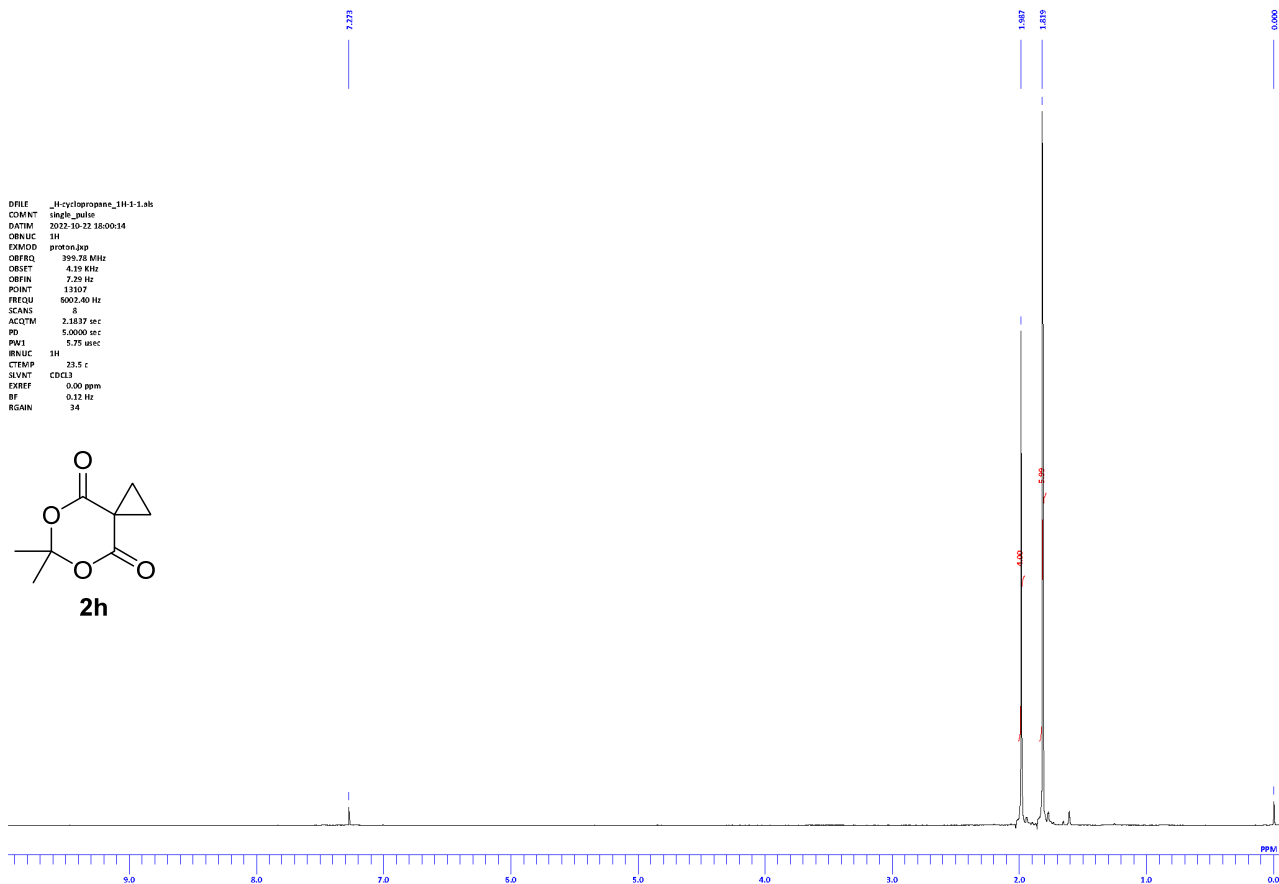

DFILE \_1H-cyclopropane\_1H-1-1.ah  
 COMNT single\_pulse  
 DATIM 2022-10-22 18:00:14  
 RNUC 1H  
 EXMOD proton.jsp  
 OBFREQ 399.76 MHz  
 OBSFET 4.19 kHz  
 OBFIN 7.29 Hz  
 POINT 13107  
 FREQU 6002.40 Hz  
 SCANS 8  
 ACQTM 2.1837 sec  
 PD 5.0000 sec  
 PW1 5.75 usec  
 RNUC 1H  
 CTEMP 23.5 c  
 SLVNT CDCl3  
 EXREF 0.00 ppm  
 RF 0.12 Hz  
 RGAIN 14

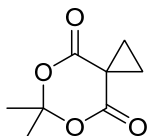

2h

C:\Users\labor\_students\Documents\NMR\1a\1\_4-p-cyclopropane\_13C-1-1.ah

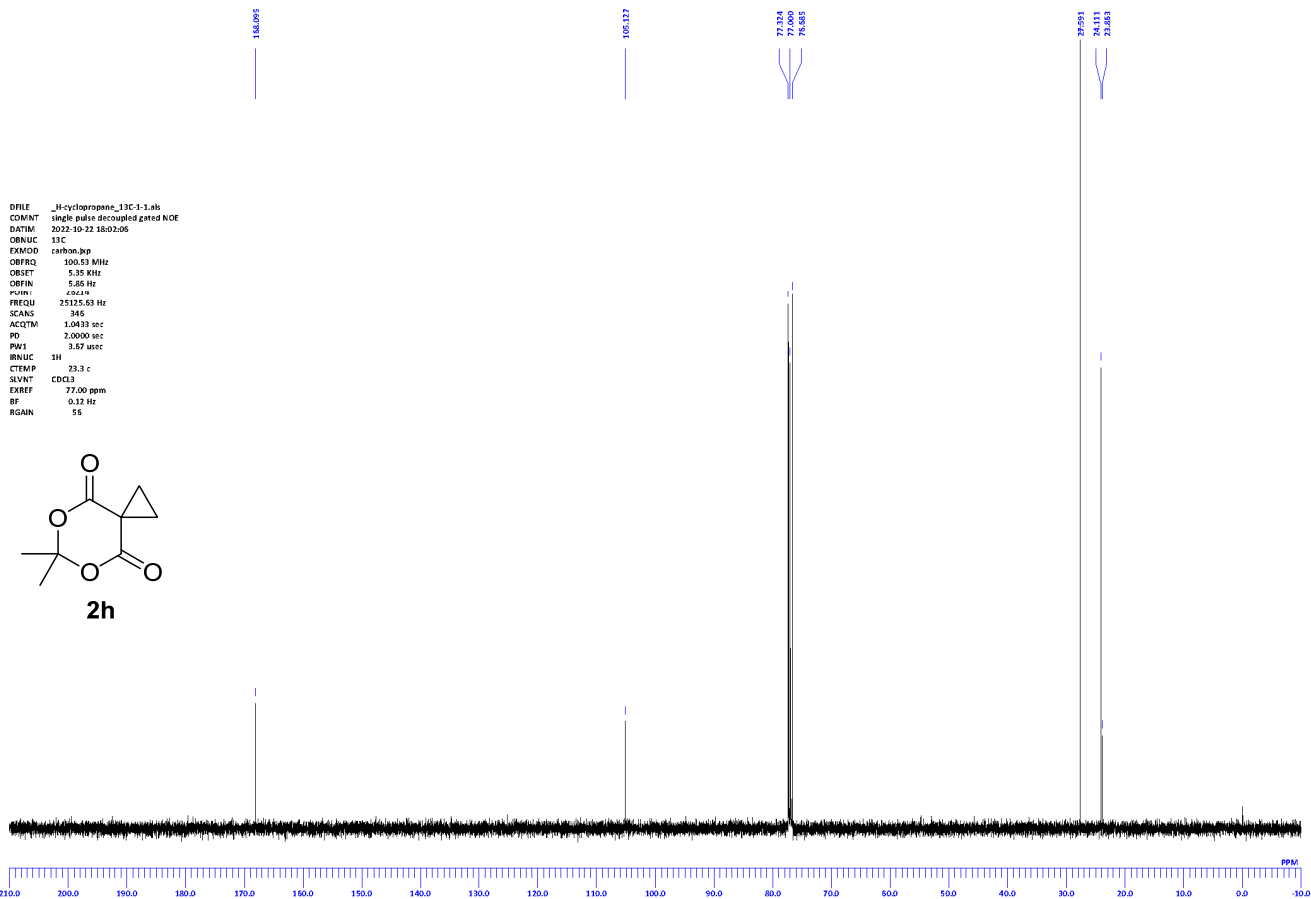

DFILE \_13C-cyclopropane\_13C-1-1.ah  
 COMNT single pulse decoupled gated NOE  
 DATIM 2022-10-22 18:02:05  
 RNUC 13C  
 EXMOD carbon.jsp  
 OBFREQ 100.63 MHz  
 OBSFET 5.35 kHz  
 OBFIN 5.85 Hz  
 POINT 25028  
 FREQU 25125.63 Hz  
 SCANS 345  
 ACQTM 1.0433 sec  
 PD 2.0000 sec  
 PW1 3.57 usec  
 RNUC 13C  
 CTEMP 23.3 c  
 SLVNT CDCl3  
 EXREF 77.00 ppm  
 RF 0.12 Hz  
 RGAIN 55

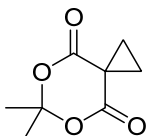

2h

C:\Users\lshoc\_students\Documents\NMR\lonaki\%A\F1F1@\*C1-4X\barbiturate\_477055-1-1 Ph-3-barbiturate.a1s

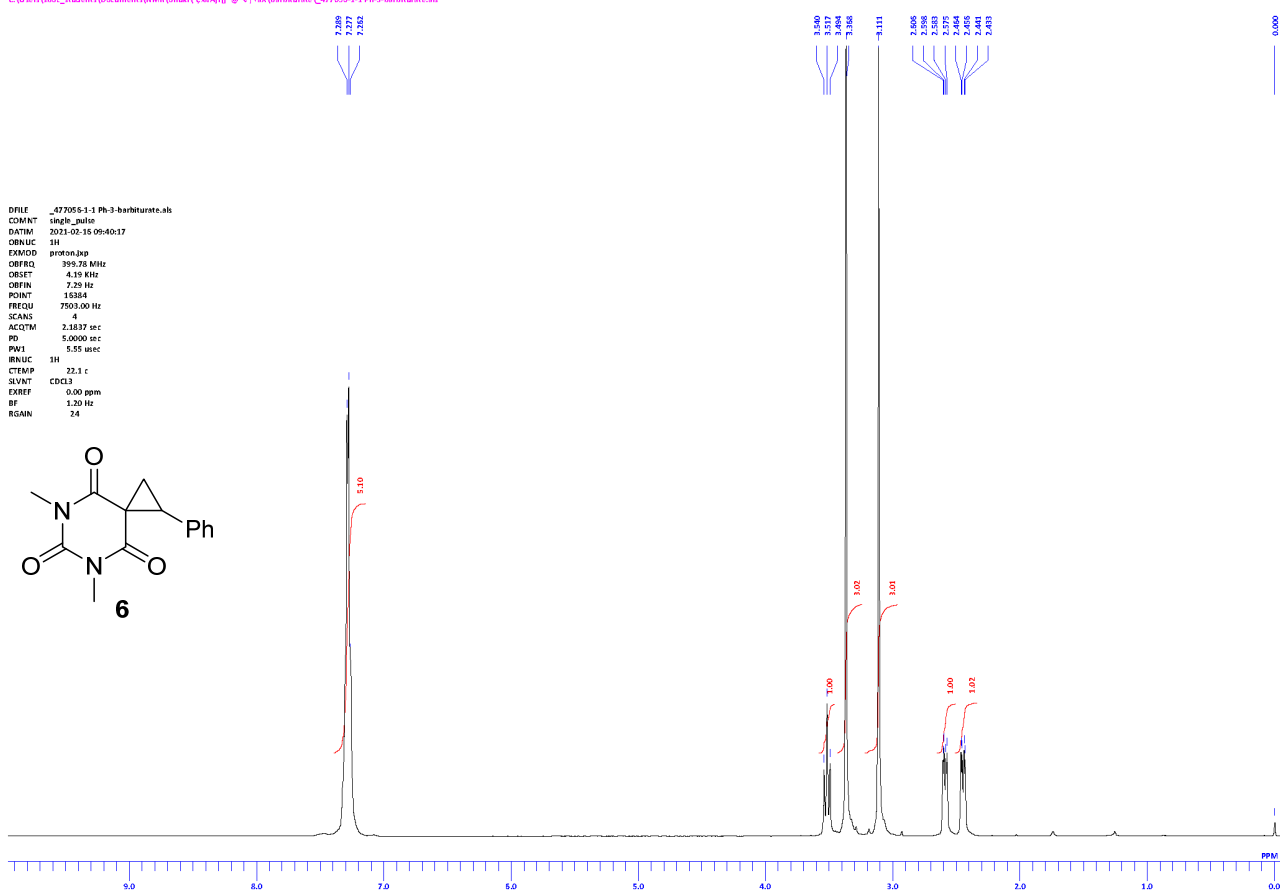

DFILE \_477055-1-1 Ph-3-barbiturate.a1s  
 COMNT single\_pulse  
 DATIM 2021-02-15 09:40:17  
 ORNUC 1H  
 EXMDO proton\_bpp  
 ORRFQ 395.76 MHz  
 OBSFT 4.19 kHz  
 ORFIN 7.29 Hz  
 POINT 15364  
 FREQU 7503.00 Hz  
 SCANS 4  
 ACQTM 2.1837 sec  
 PD 5.0000 sec  
 PW1 5.55 usec  
 RNUC 1H  
 CTEMP 22.1 c  
 SLVNT CDCl3  
 EXREF 0.00 ppm  
 BF 1.20 Hz  
 RGAIN 24

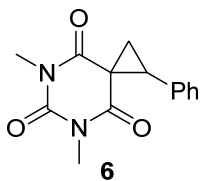

C:\Users\lshoc\_students\Documents\NMR\lonaki\%A\F1F1@\*C1-4X\barbiturate\_477055-1-1 Ph-3-barbiturate-13C.a1s

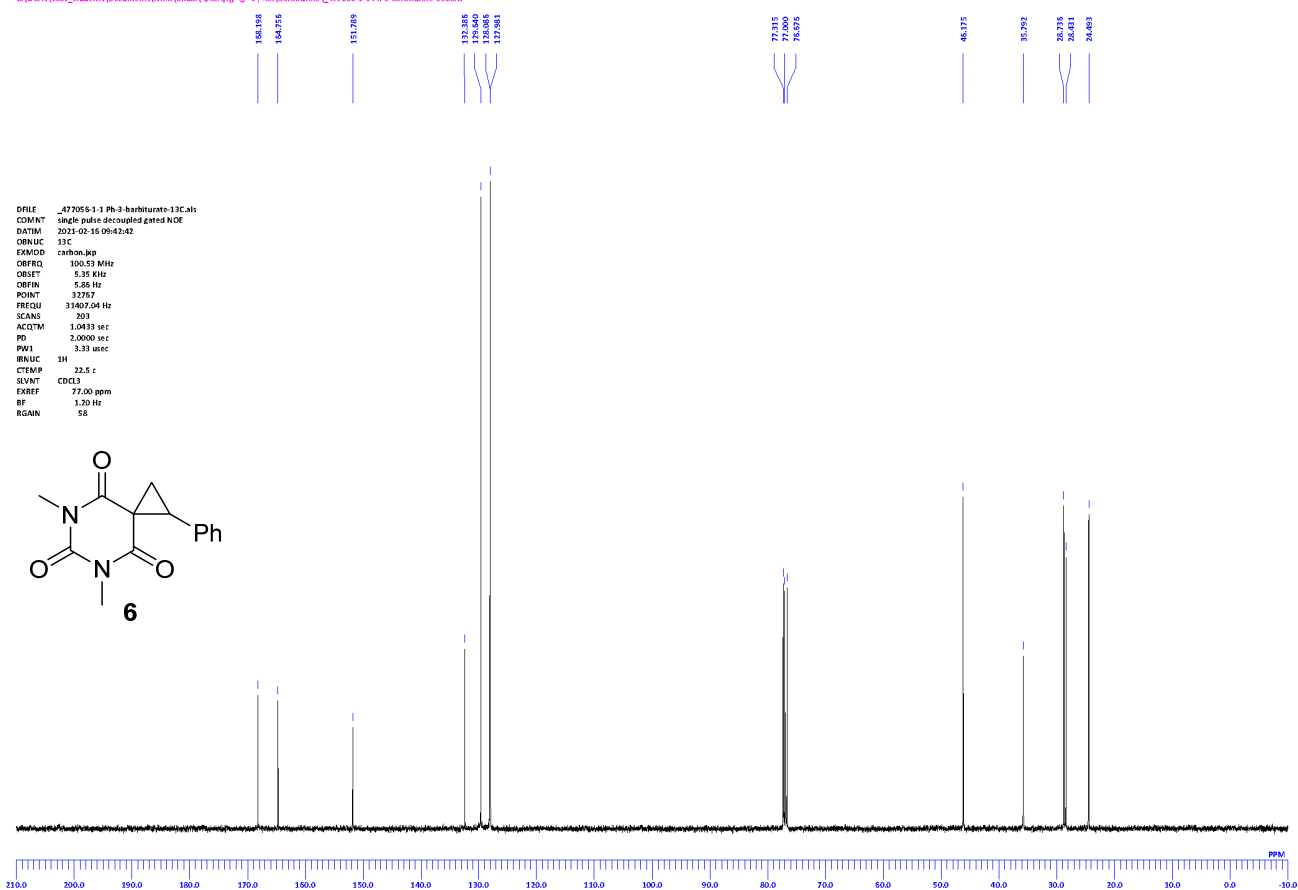

DFILE \_477055-1-1 Ph-3-barbiturate-13C.a1s  
 COMNT single\_pulse decoupled gated NOE  
 DATIM 2021-02-15 09:42:42  
 ORNUC 13C  
 EXMDO carbon\_bpp  
 ORRFQ 100.53 MHz  
 OBSFT 5.35 kHz  
 ORFIN 5.85 Hz  
 POINT 32797  
 FREQU 31407.68 Hz  
 SCANS 203  
 ACQTM 1.0453 sec  
 PD 3.0000 sec  
 PW1 3.33 usec  
 RNUC 1H  
 CTEMP 22.5 c  
 SLVNT CDCl3  
 EXREF 77.00 ppm  
 BF 1.20 Hz  
 RGAIN 58

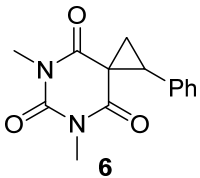

C:\Users\ibor\_students\Documents\NMR\1a1\1-p-cyclobutane\_Ph-Ph\_cyclobutane\_1H-1-1.a1s

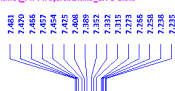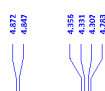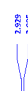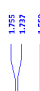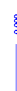

DFILE \_Ph-Ph\_cyclobutane\_1H-1-1.a1s  
 COMNT single\_pulse  
 DATIM 2022-10-15 17:11:45  
 ORNUC 1H  
 EXMOD proton.jpg  
 ORFREQ 395.76 MHz  
 OBSSET 4.19 kHz  
 ORFIN 7.79 Hz  
 POINT 13107  
 FREQU 6002.40 Hz  
 SCANS 8  
 ACQTM 2.1837 sec  
 PD 5.0000 sec  
 PWS 5.75 usec  
 ORNUC 1H  
 CTEMP 22.9 c  
 SOLVT CDCl3  
 EXREF 0.00 ppm  
 BF 0.12 Hz  
 RGAIN 38

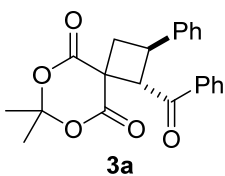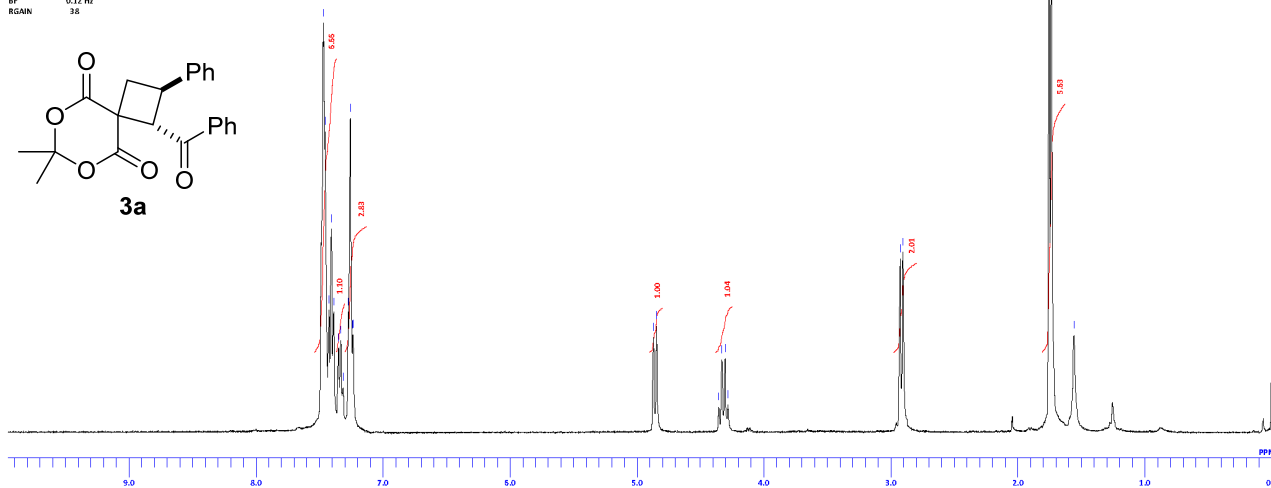

C:\Users\ibor\_students\Documents\NMR\1a1\1-p-cyclobutane\_Ph-Ph\_cyclobutane\_13C-2-1-1.a1s

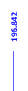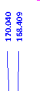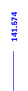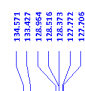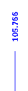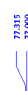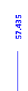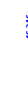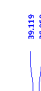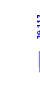

DFILE \_Ph-Ph\_cyclobutane\_13C-2-1-1.a1s  
 COMNT single\_pulse decoupled gated NOE  
 DATIM 2022-10-24 14:38:24  
 ORNUC 13C  
 EXMOD carbon.jpg  
 ORFREQ 100.63 MHz  
 OBSSET 5.35 kHz  
 ORFIN 5.85 Hz  
 POINT 2614  
 FREQU 25125.63 Hz  
 SCANS 788  
 ACQTM 1.0423 sec  
 PD 2.0000 sec  
 PWS 3.67 usec  
 ORNUC 1H  
 CTEMP 23.0 c  
 SOLVT CDCl3  
 EXREF 77.00 ppm  
 BF 0.12 Hz  
 RGAIN 55

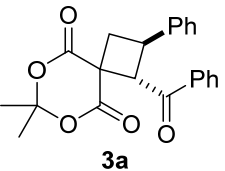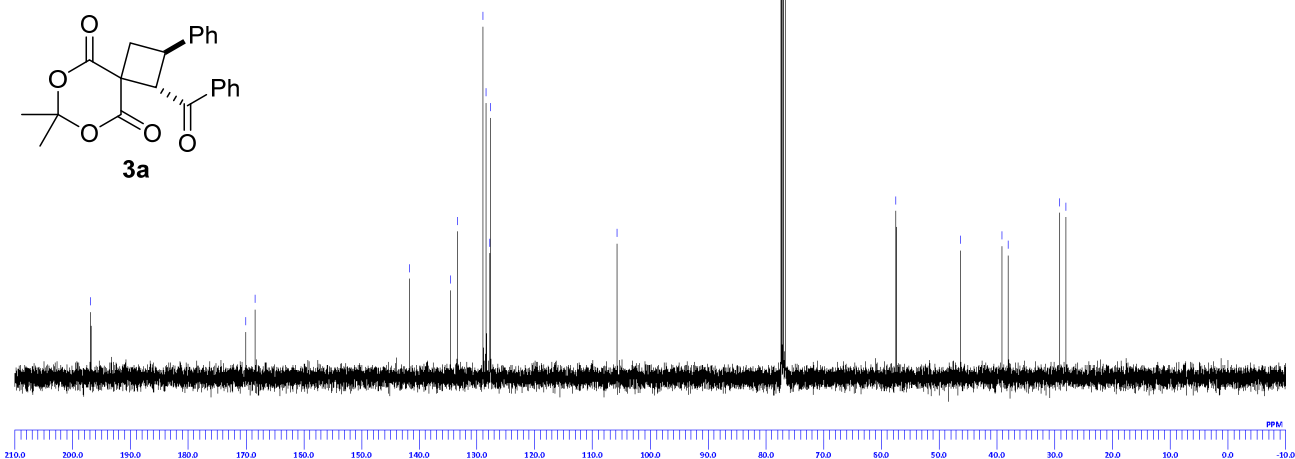

C:\Users\labo\_tudent\Documents\NMR\iso\\*\_g-p\cyclobutane\_Ph-pOMePh\_cyclobutane\_1H-1-1.als

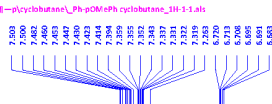

D1FILE \_Ph-pOMePh\_cyclobutane\_1H-1-1.als  
 COMINT single\_pulse  
 DATIM 2022-10-21 11:33:15  
 ORNUC 1H  
 EXMDO proton\_kp  
 OFFRQ 399.76 MHz  
 OBSST 4.19 kHz  
 OFPIN 7.29 Hz  
 POINT 13107  
 FREQU 6002.40 Hz  
 SCANS 8  
 ACQTM 2.1837 sec  
 PD 5.0000 sec  
 PW1 5.75 usec  
 ORNUC 1H  
 CTEMP 23.8 c  
 SLVNT CDCl3  
 EXREF 0.00 ppm  
 BF 0.12 Hz  
 RGAIN 34

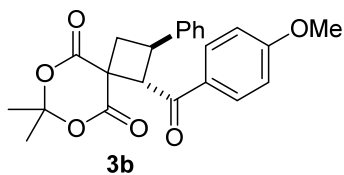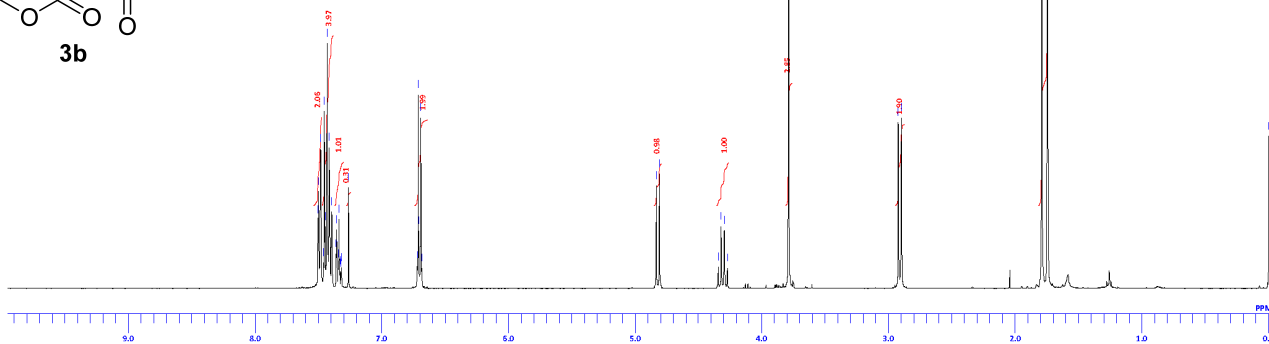

C:\Users\labo\_tudent\Documents\NMR\iso\\*\_g-p\cyclobutane\_Ph-pOMePh\_cyclobutane\_13C-1-1.als

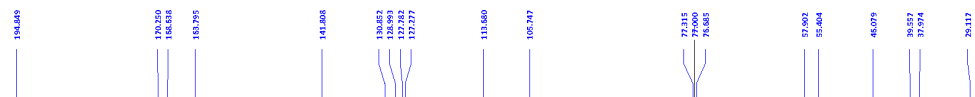

D1FILE \_Ph-pOMePh\_cyclobutane\_13C-1-1.als  
 COMINT single\_pulse discooped gated NDE  
 DATIM 2022-10-21 11:35:52  
 ORNUC 13C  
 EXMDO carbon\_kp  
 OFFRQ 100.63 MHz  
 OBSST 5.35 kHz  
 OFPIN 5.85 Hz  
 POINT 25214  
 FREQU 25125.63 Hz  
 SCANS 234  
 ACQTM 1.0423 sec  
 PD 2.0000 sec  
 PW1 3.67 usec  
 ORNUC 13C  
 CTEMP 23.6 c  
 SLVNT CDCl3  
 EXREF 77.00 ppm  
 BF 0.12 Hz  
 RGAIN 54

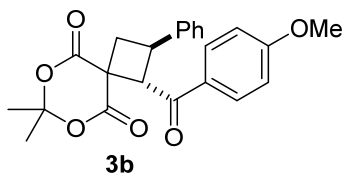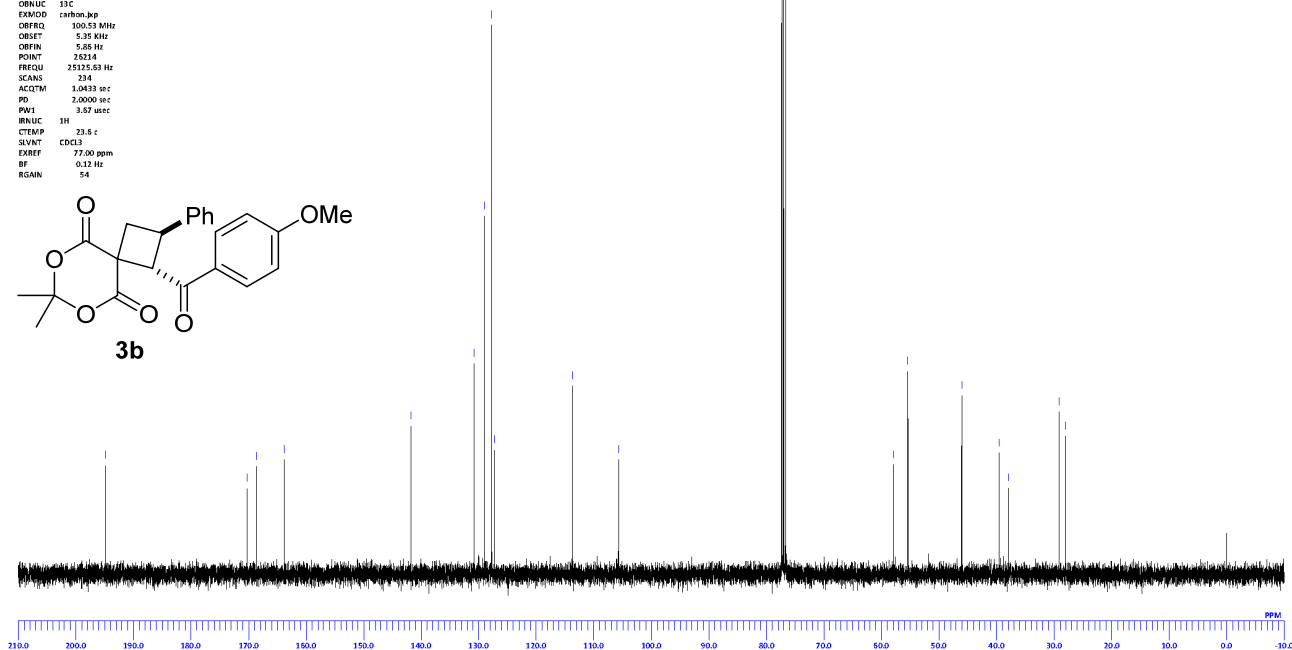

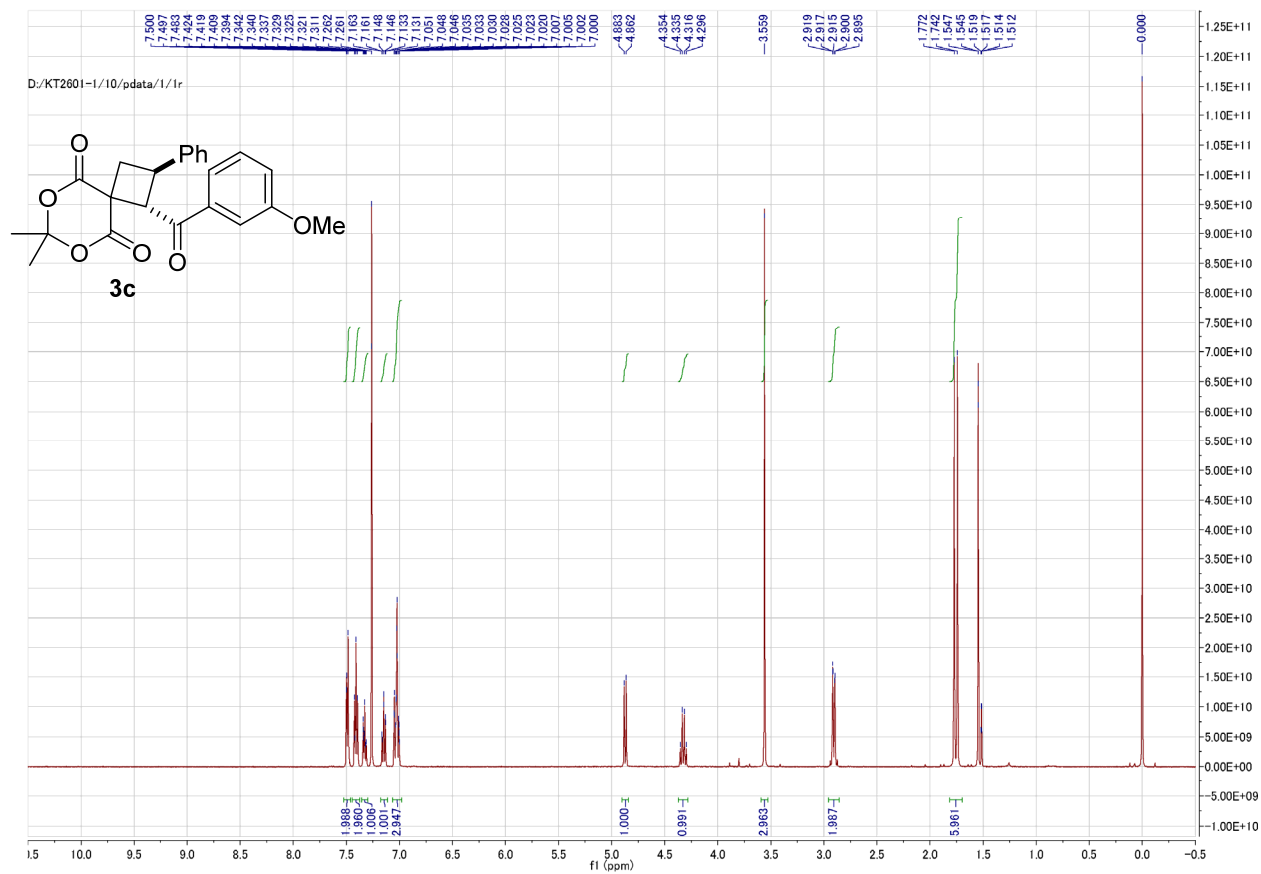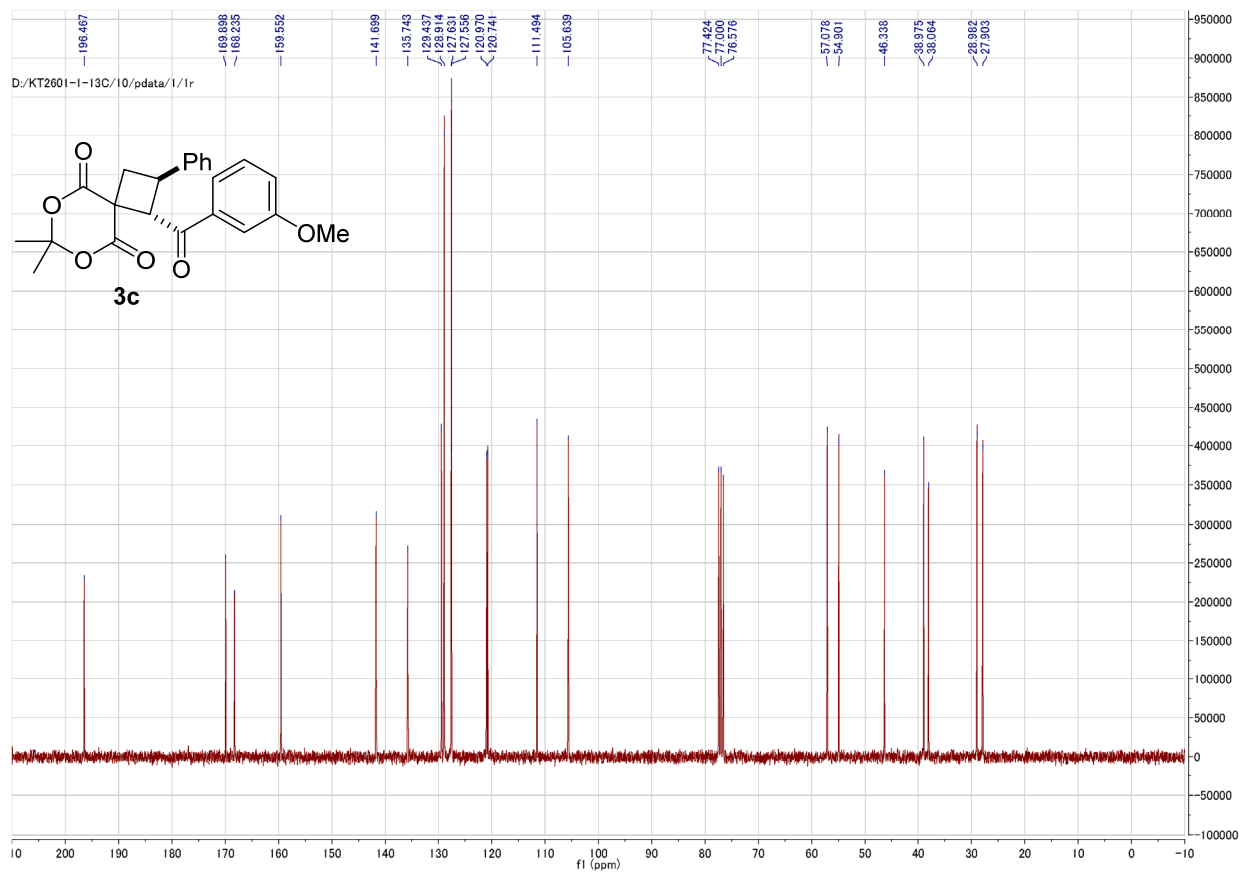

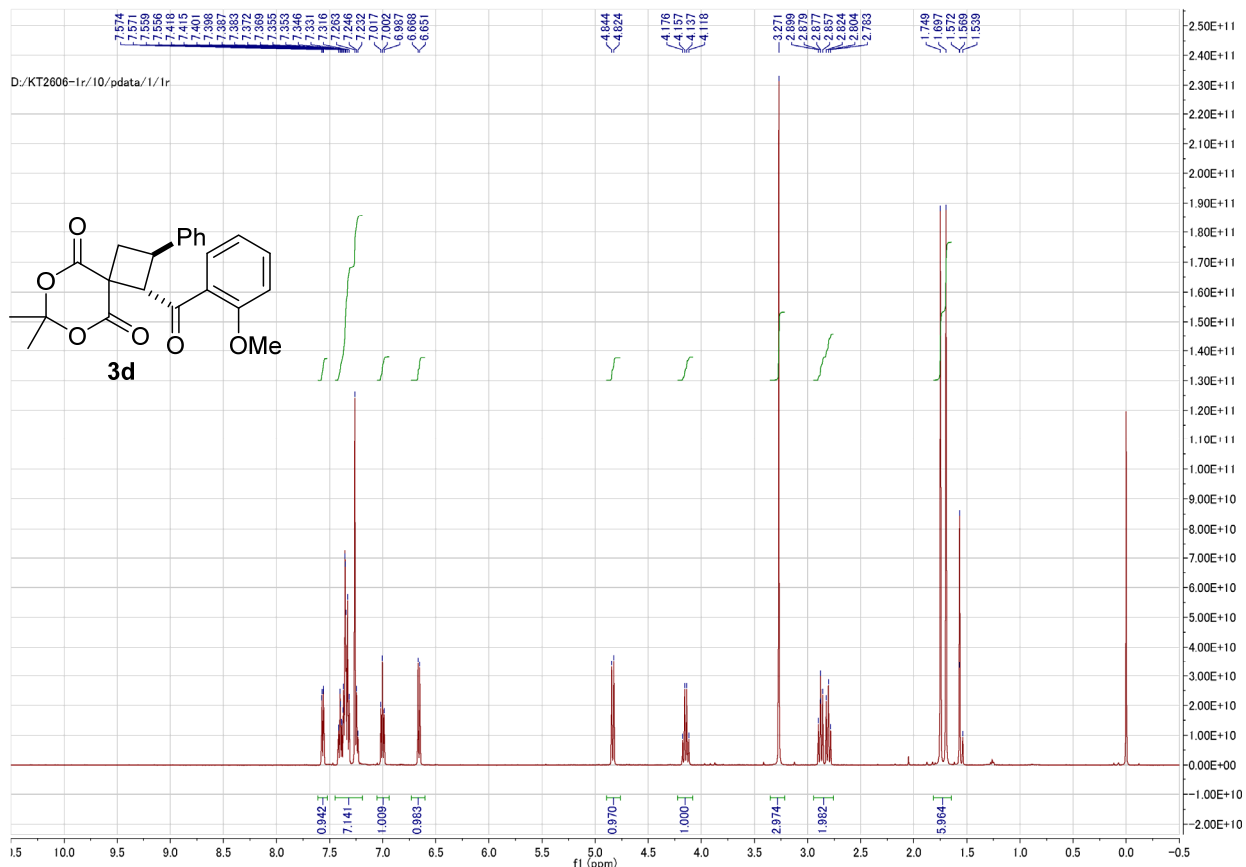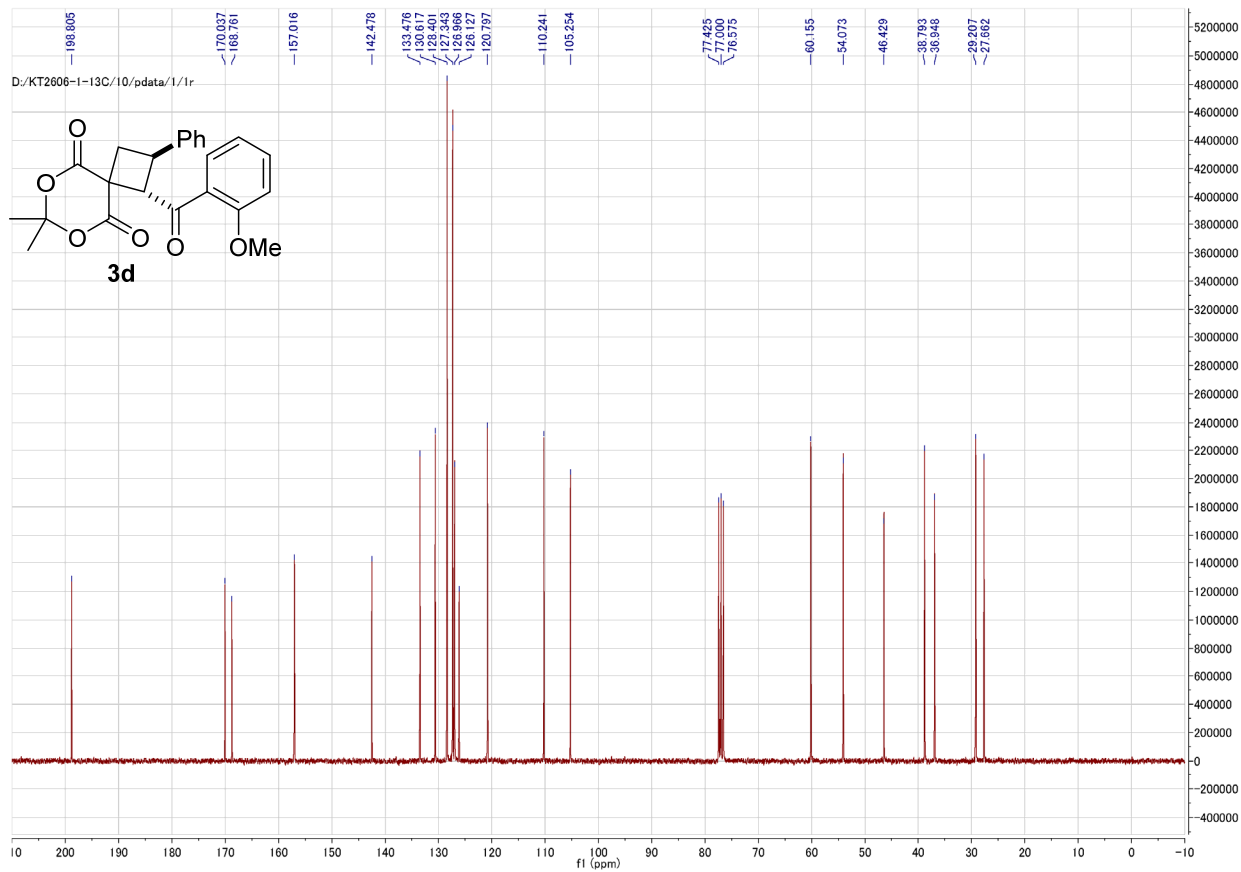

C:\Users\labo\_students\Documents\NMR\13c\1-1-p-cyclobutane\_pNO2Ph\_cyclobutane\_1H-1-1.a1s

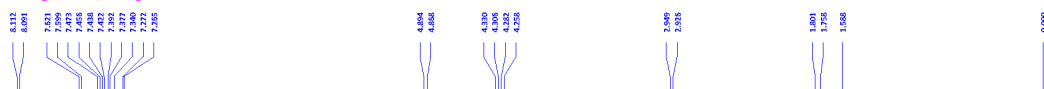

DFILE \_Ph-pNO2Ph\_cyclobutane\_1H-1-1.a1s  
 COMINT single\_pulse  
 DATIM 2022-10-19 15:37:43  
 ORNUC 1H  
 EXMOD proton.jpg  
 OBFRQ 399.76 MHz  
 OBSST 4.19 kHz  
 OBFIN 2.75 Hz  
 POINT 13107  
 FREQU 6002.40 Hz  
 SCANS 4  
 ACQTM 2.1837 sec  
 PD 5.0000 sec  
 PW1 5.75 usec  
 IRNUC 1H  
 CTEMP 23.3 c  
 SVANT CDCl3  
 EXREF 0.00 ppm  
 BF 0.12 Hz  
 RGAIN 35

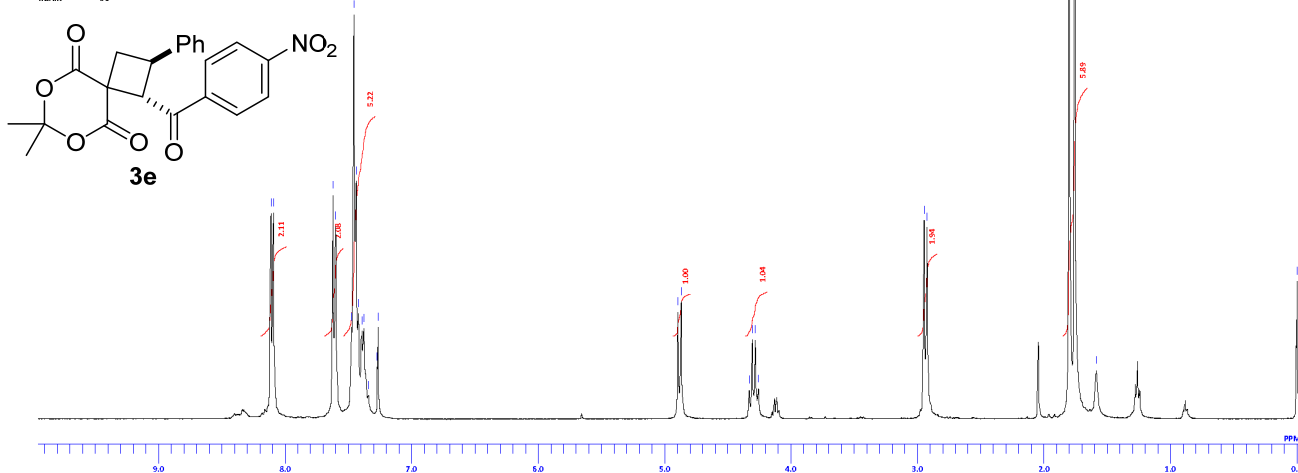

C:\Users\labo\_students\Documents\NMR\13c\1-1-p-cyclobutane\_pNO2Ph\_cyclobutane\_13C-1-1.a1s

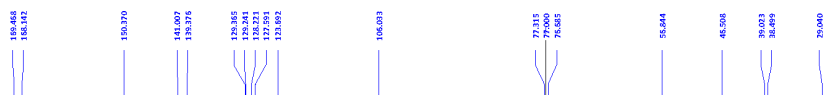

DFILE \_Ph-pNO2Ph\_cyclobutane\_13C-1-1.a1s  
 COMINT single\_pulse decoupled gated NOE  
 DATIM 2022-10-19 15:40:25  
 ORNUC 13C  
 EXMOD carbon.jpg  
 OBFRQ 100.63 MHz  
 OBSST 5.35 kHz  
 OBFIN 5.85 Hz  
 POINT 72314  
 FREQU 25125.63 Hz  
 SCANS 402  
 ACQTM 1.0433 sec  
 PD 2.0000 sec  
 PW1 3.67 usec  
 IRNUC 13H  
 CTEMP 23.3 c  
 SVANT CDCl3  
 EXREF 77.00 ppm  
 BF 0.12 Hz  
 RGAIN 58

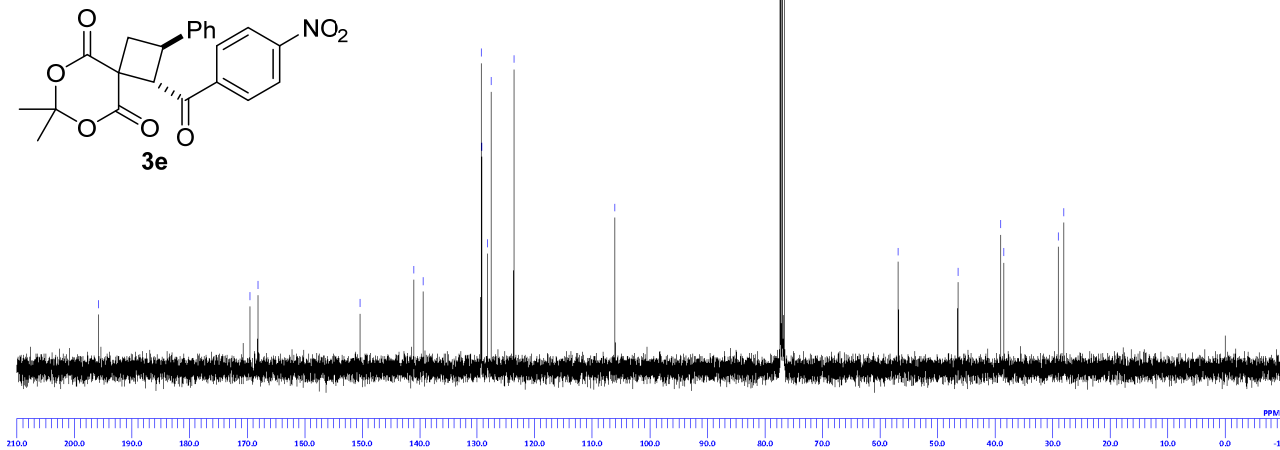

C:\Users\labo\_students\Documents\NMR\ssio\\*\_f-Ph\cyclobutane\_Ph-pClPh cyclobutane\_1H-1-1.sls

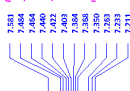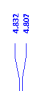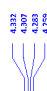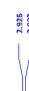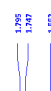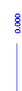

ORF1 \_Ph-pClPh cyclobutane\_1H-1-1.sls  
 COMNT single\_pulse  
 DATIM 2022-10-18 18:09:09  
 ORNUC 1H  
 EXMOD proton\_bpp  
 ORFRQ 399.78 MHz  
 OBSET 4.19 kHz  
 ORFIN 7.29 Hz  
 POINT 13107  
 FRFQU 6002.40 Hz  
 SCANS 8  
 ACQTM 2.1837 sec  
 PD 5.0000 sec  
 PW1 5.75 usec  
 IRNUC 1H  
 CTEMP 23.3 c  
 SLVNT CDCl3  
 EXREF 0.00 ppm  
 BF 0.12 Hz  
 RGAIN 38

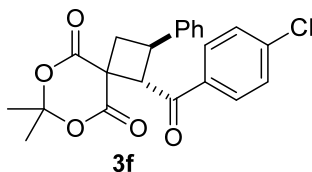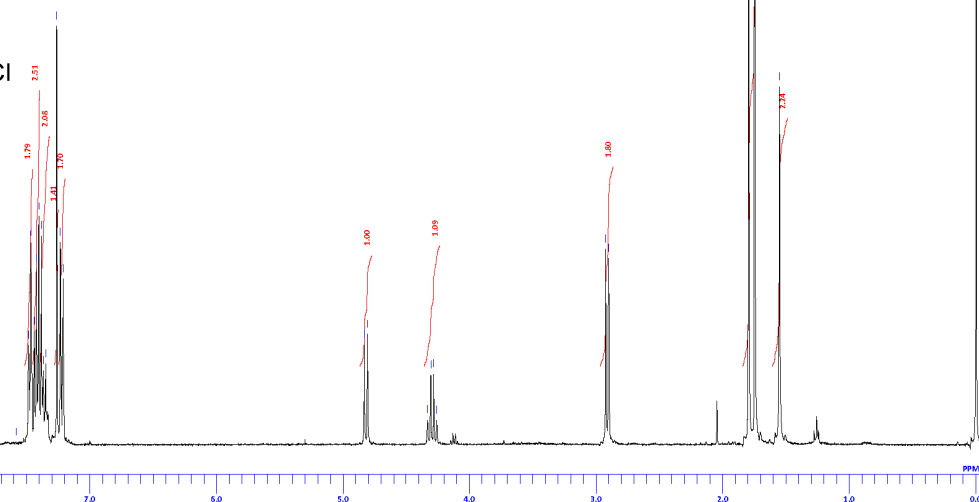

C:\Users\labo\_students\Documents\NMR\ssio\\*\_f-Ph\cyclobutane\_Ph-pClPh cyclobutane\_2\_13C-1-1.sls

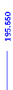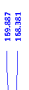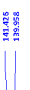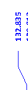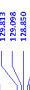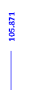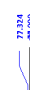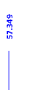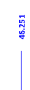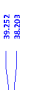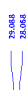

ORF1 \_Ph-pClPh cyclobutane\_2\_13C-1-1.sls  
 COMNT single\_pulse decoupled gated NOE  
 DATIM 2022-10-24 19:47:13  
 ORNUC 13C  
 EXMOD carbon\_bpp  
 ORFRQ 100.63 MHz  
 OBSET 5.35 kHz  
 ORFIN 5.85 Hz  
 POINT 26214  
 FRFQU 25215.63 Hz  
 SCANS 251  
 ACQTM 1.0433 sec  
 PD 2.0000 sec  
 PW1 3.67 usec  
 IRNUC 1H  
 CTEMP 23.2 c  
 SLVNT CDCl3  
 EXREF 77.00 ppm  
 BF 0.12 Hz  
 RGAIN 58

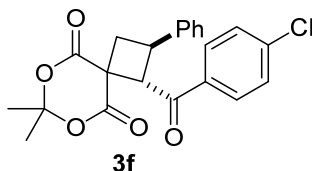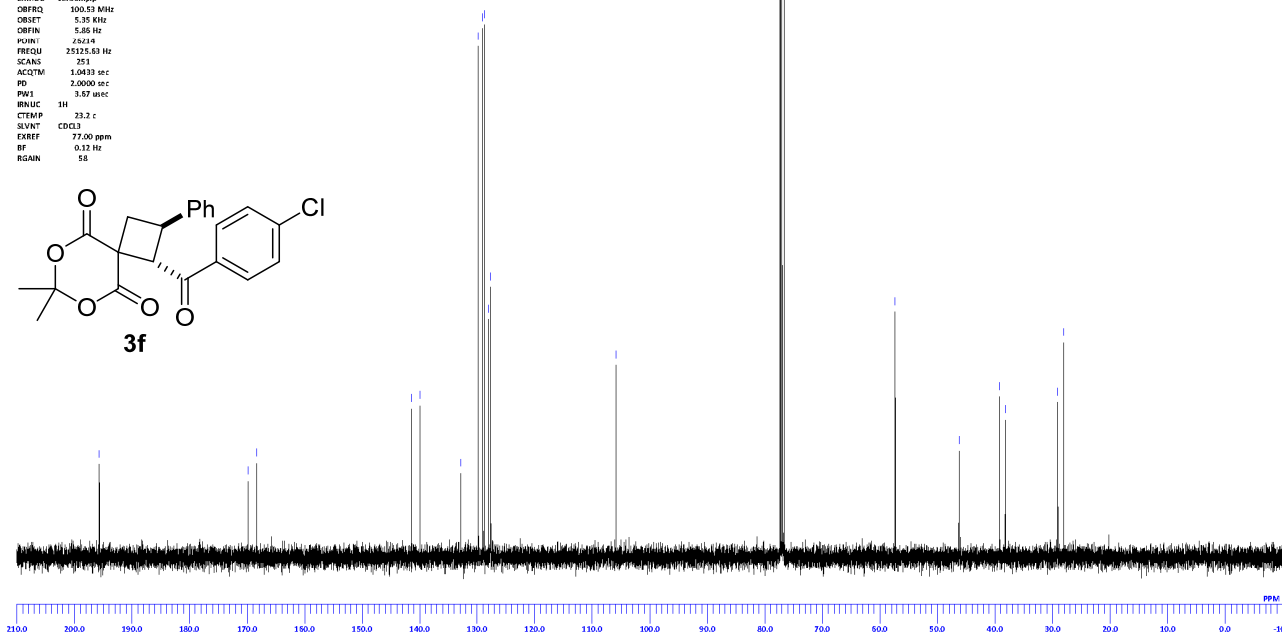



C:\Users\shoc\_students\Documents\NMR\iso\\*\_1-(cyclobutane)\_Ph-Me cyclobutane\_1H-1-1.ah

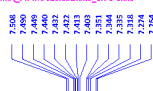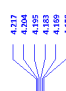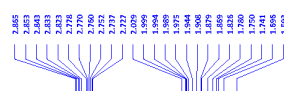

0.000

DFILE \_Ph-Me cyclobutane\_1H-1-1.ah  
 CDMNT single\_pulse  
 DATIM 2022-10-19 14:38:55  
 ORNUC 1H  
 EXMOD proton.jsp  
 ORFREQ 395.76 MHz  
 ORSET 4.19 KHz  
 ORFIN 7.75 Hz  
 POINT 13107  
 FREQU 6002.40 Hz  
 SCANS 8  
 ACQTM 2.1837 sec  
 PD 5.0000 sec  
 PW1 5.75 usec  
 RNUC 1H  
 CTEMP 22.5 c  
 SLVNT CDCl3  
 EXREF 0.00 ppm  
 BF 0.12 Hz  
 RGAIN 35

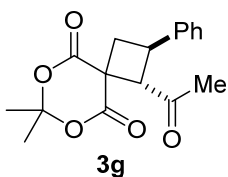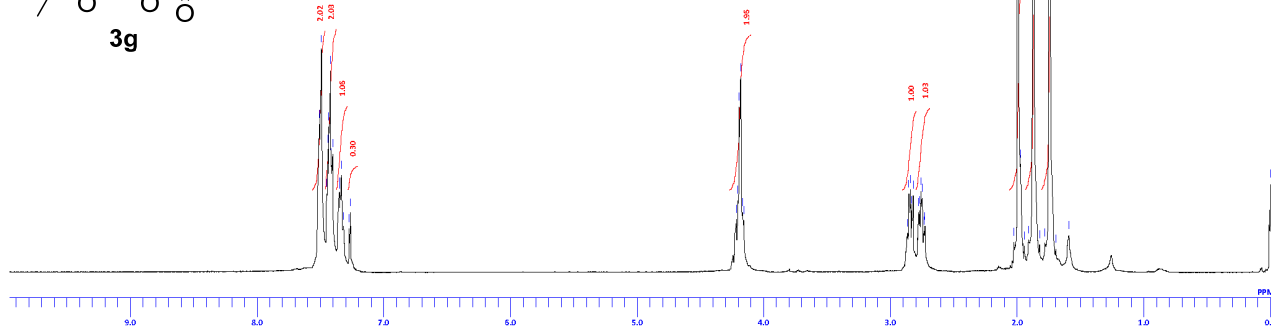

C:\Users\shoc\_students\Documents\NMR\iso\\*\_1-(cyclobutane)\_Ph-Me cyclobutane\_13C-1-1.ah

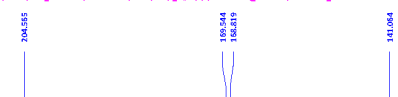

DFILE \_Ph-Me cyclobutane\_13C-1-1.ah  
 CDMNT single\_pulse\_decoupled\_gated\_NDE  
 DATIM 2022-10-19 14:40:59  
 ORNUC 13C  
 EXMOD carbon.jsp  
 ORFREQ 100.53 MHz  
 ORSET 5.55 KHz  
 ORFIN 5.66 Hz  
 POINT 28214  
 FREQU 252.15 MHz  
 SCANS 387  
 ACQTM 3.0433 sec  
 PD 3.0000 sec  
 PW1 3.57 usec  
 RNUC 1H  
 CTEMP 23.5 c  
 SLVNT CDCl3  
 EXREF 77.00 ppm  
 BF 0.12 Hz  
 RGAIN 55

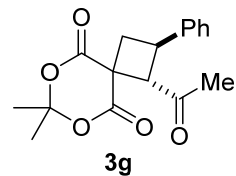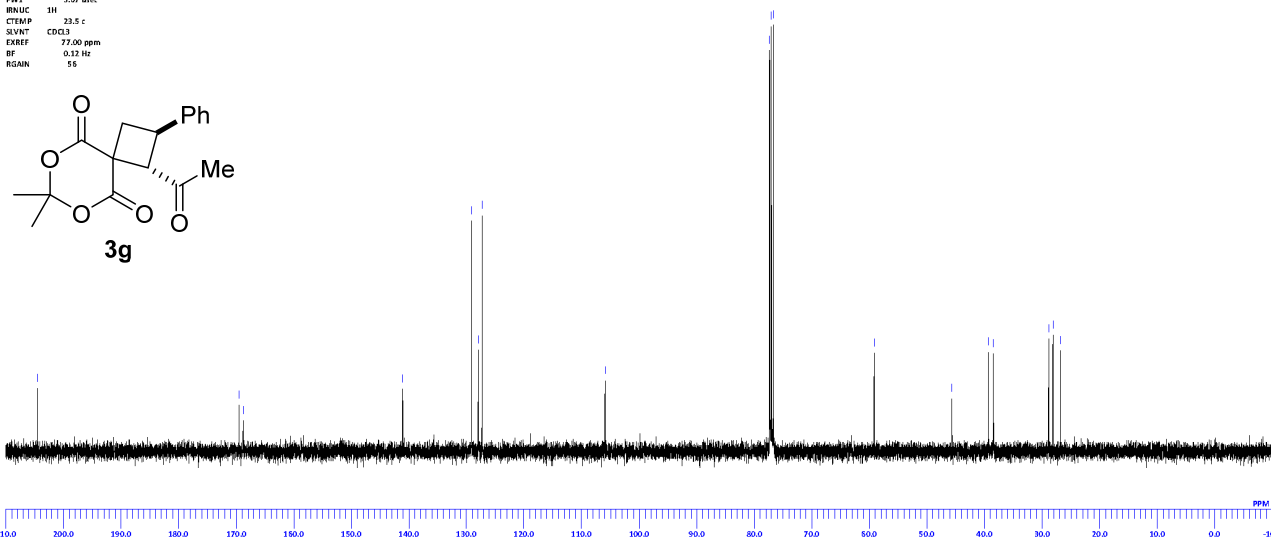

C:\Users\shor\_students\Documents\NMR\ss0\\*\_1-p(cyclobutane)\_Ph-OEt\_cyclobutane\_1H-1-1.als

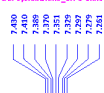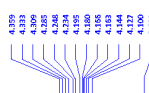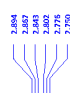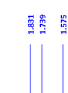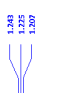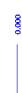

D1FILE \_Ph-OEt\_cyclobutane\_1H-1-1.als  
COMINT single\_pulse  
DATIM 2022-10-22 17:33:18  
ORNUC 1H  
EXMOD prisma-1np  
ORFRQ 399.76 MHz  
ORSET 4.19 KHz  
ORFIN 7.29 Hz  
POINT 13107  
FREQU 6002.40 Hz  
SCANS 8  
ACQTM 2.1837 sec  
PD 5.0000 sec  
PWI 5.75 usec  
ORNUC 1H  
CTEMP 23.3 c  
SOLNT CDCl3  
EXREF 0.00 ppm  
BF 0.12 Hz  
RGAIN 34

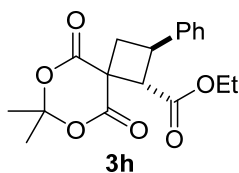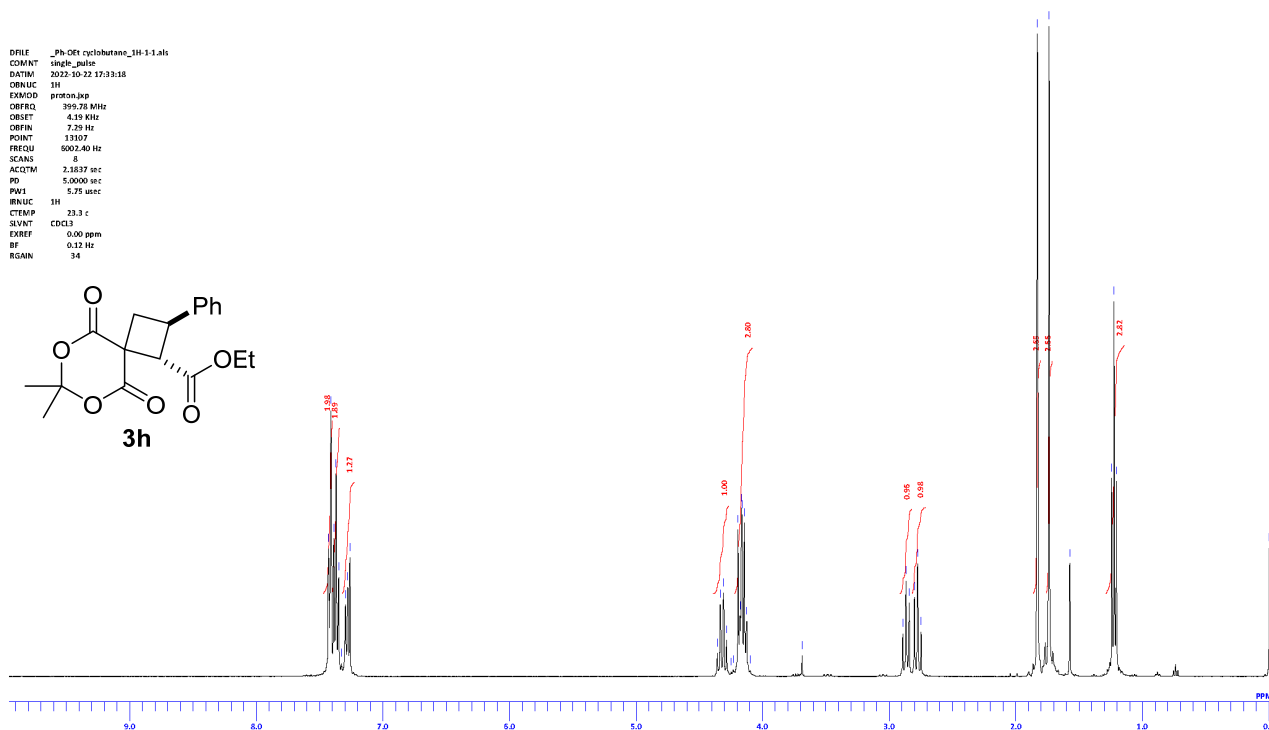

C:\Users\shor\_students\Documents\NMR\ss0\\*\_1-p(cyclobutane)\_Ph-OEt\_cyclobutane\_13C-1-1.als

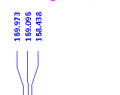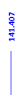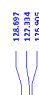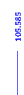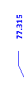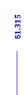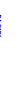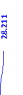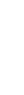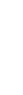

D1FILE \_Ph-OEt\_cyclobutane\_13C-1-1.als  
COMINT single\_pulse decoupled gated NOE  
DATIM 2022-10-22 17:35:20  
ORNUC 13C  
EXMOD carbon-1np  
ORFRQ 100.53 MHz  
ORSET 5.35 KHz  
ORFIN 5.66 Hz  
POINT 26214  
FREQU 25125.53 Hz  
SCANS 370  
ACQTM 1.0433 sec  
PD 2.0000 sec  
PWI 3.67 usec  
ORNUC 13C  
CTEMP 23.4 c  
SOLNT CDCl3  
EXREF 77.00 ppm  
BF 0.12 Hz  
RGAIN 58

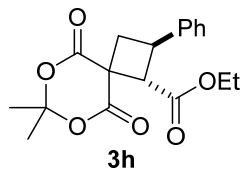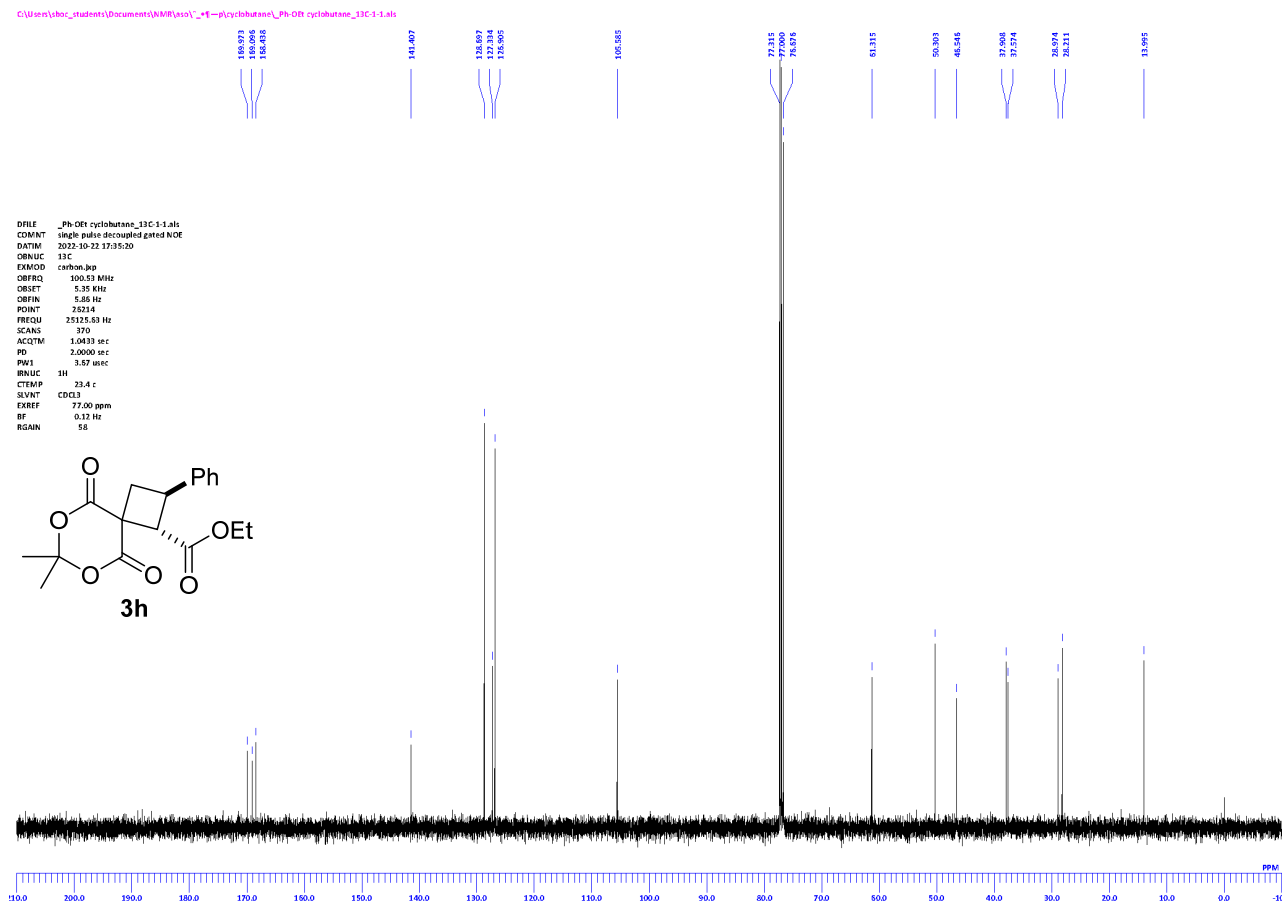



C:\Users\shoc\_students\Documents\NMR\ssos\\*\_E-p(cyclobutane)\_pMePh cyclobutane\_1H-1-1ab

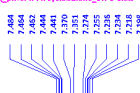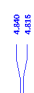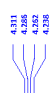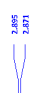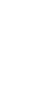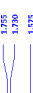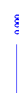

DFILE \_pMePh-Ph cyclobutane\_1H-1-1ab  
 COMMENT single\_pulse  
 DATIM 2022-10-20 15:04:03  
 ORNUC 1H  
 EXMOD pmtoss.jpg  
 OBFRQ 399.76 MHz  
 ORSET 4.19 KHz  
 OBFIN 7.75 KHz  
 POINT 13107  
 FREQU 6002.40 Hz  
 SCANS 8  
 ACQTM 2.1837 sec  
 PD 5.0000 sec  
 PW1 5.75 usec  
 RNUC 1H  
 CTEMP 27.4 c  
 SVANT CDCl3  
 EXREF 0.00 ppm  
 RF 0.12 Hz  
 RGAIN 34

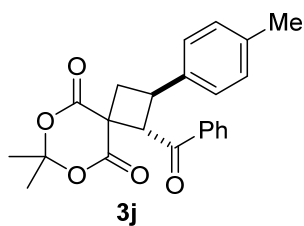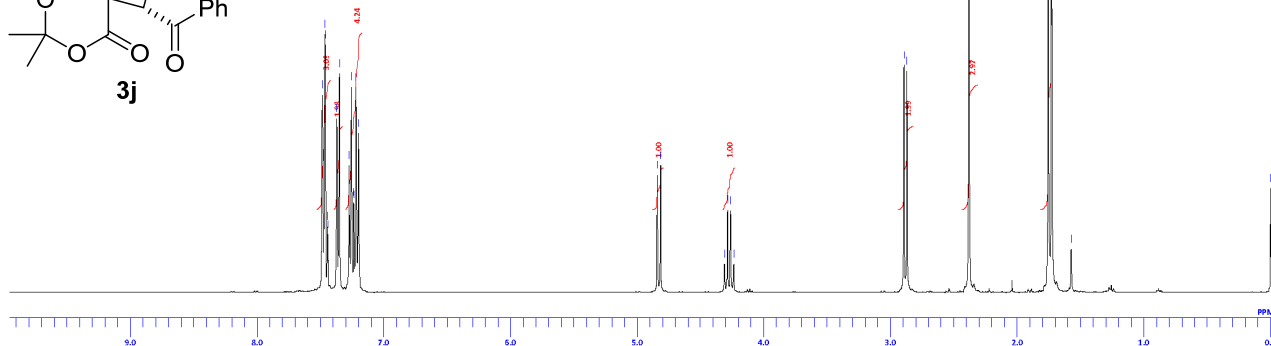

C:\Users\shoc\_students\Documents\NMR\ssos\\*\_E-p(cyclobutane)\_pMePh cyclobutane\_13C-1-1ab

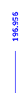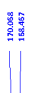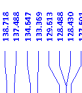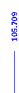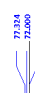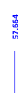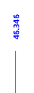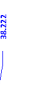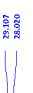

DFILE \_pMePh-Ph cyclobutane\_13C-1-1ab  
 COMMENT single pulse decoupled gated NOE  
 DATIM 2022-10-20 15:06:14  
 ORNUC 13C  
 EXMOD carbon.jpg  
 OBFRQ 100.63 MHz  
 ORSET 5.35 KHz  
 OBFIN 5.85 KHz  
 POINT 25314  
 FREQU 12515.93 Hz  
 SCANS 219  
 ACQTM 3.0433 sec  
 PD 2.0000 sec  
 PW1 3.67 usec  
 RNUC 1H  
 CTEMP 27.5 c  
 SVANT CDCl3  
 EXREF 77.00 ppm  
 RF 0.12 Hz  
 RGAIN 58

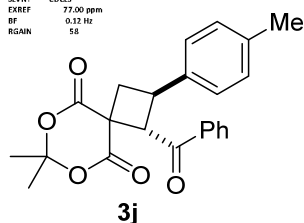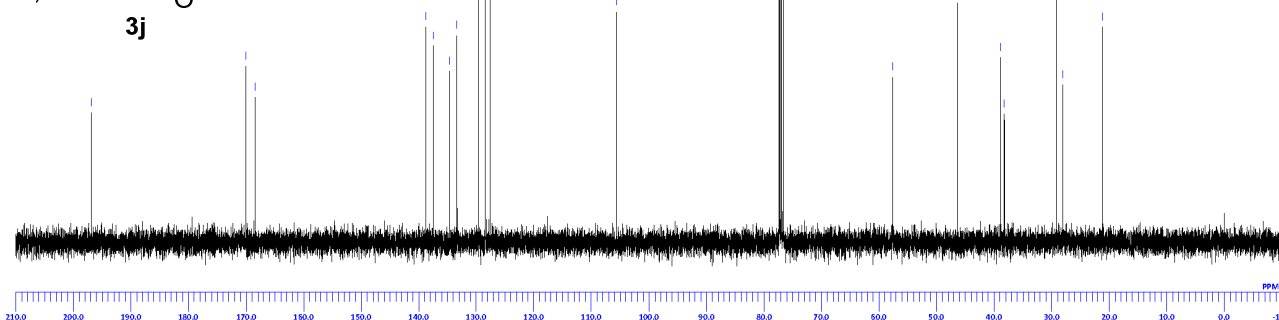

C:\Users\labo\_students\Documents\NMR\iso\\*\_1-p-cyclobutane\_pBrPh-Ph cyclobutane\_1H-1-1.als

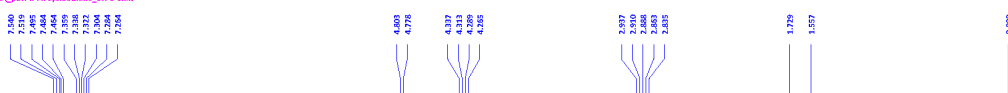

DFILE \_pBrPh-Ph cyclobutane\_1H-1-1.als  
 COMINT single\_pulse  
 DATIM 2022-10-16 17:26:51  
 ORNUC 1H  
 EXMDO proton\_kap  
 OBFQ 300.76 MHz  
 OBFQ 4.19 KHz  
 OBFIN 7.20 Hz  
 POINT 13107  
 FREQU 6002.40 Hz  
 SCANS 8  
 ACCTM 2.1837 sec  
 PD 5.0000 sec  
 PWT 5.75 usec  
 ORNUC 1H  
 CTEMP 22.9 c  
 SVNT CDCl3  
 EXREF 0.00 ppm  
 BF 0.12 Hz  
 RGAIN 40

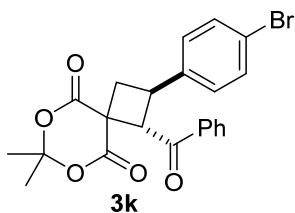

C:\Users\labo\_students\Documents\NMR\iso\\*\_1-p-cyclobutane\_pBrPh-Ph cyclobutane\_13C-2-1-1.als

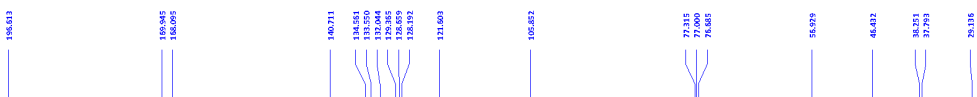

DFILE \_pBrPh-Ph cyclobutane\_13C-2-1-1.als  
 COMINT single\_pulse decoupled gated NDE  
 DATIM 2022-10-24 15:16:20  
 ORNUC 13C  
 EXMDO carbon\_kap  
 OBFQ 100.63 MHz  
 OBFQ 5.35 KHz  
 OBFIN 5.85 Hz  
 POINT 20314  
 FREQU 25325.63 Hz  
 SCANS 240  
 ACCTM 1.0433 sec  
 PD 2.0000 sec  
 PWT 3.67 usec  
 ORNUC 13H  
 CTEMP 23.0 c  
 SVNT CDCl3  
 EXREF 77.00 ppm  
 BF 0.12 Hz  
 RGAIN 56

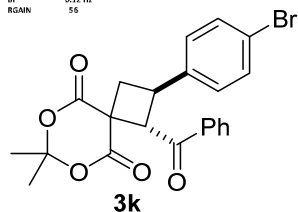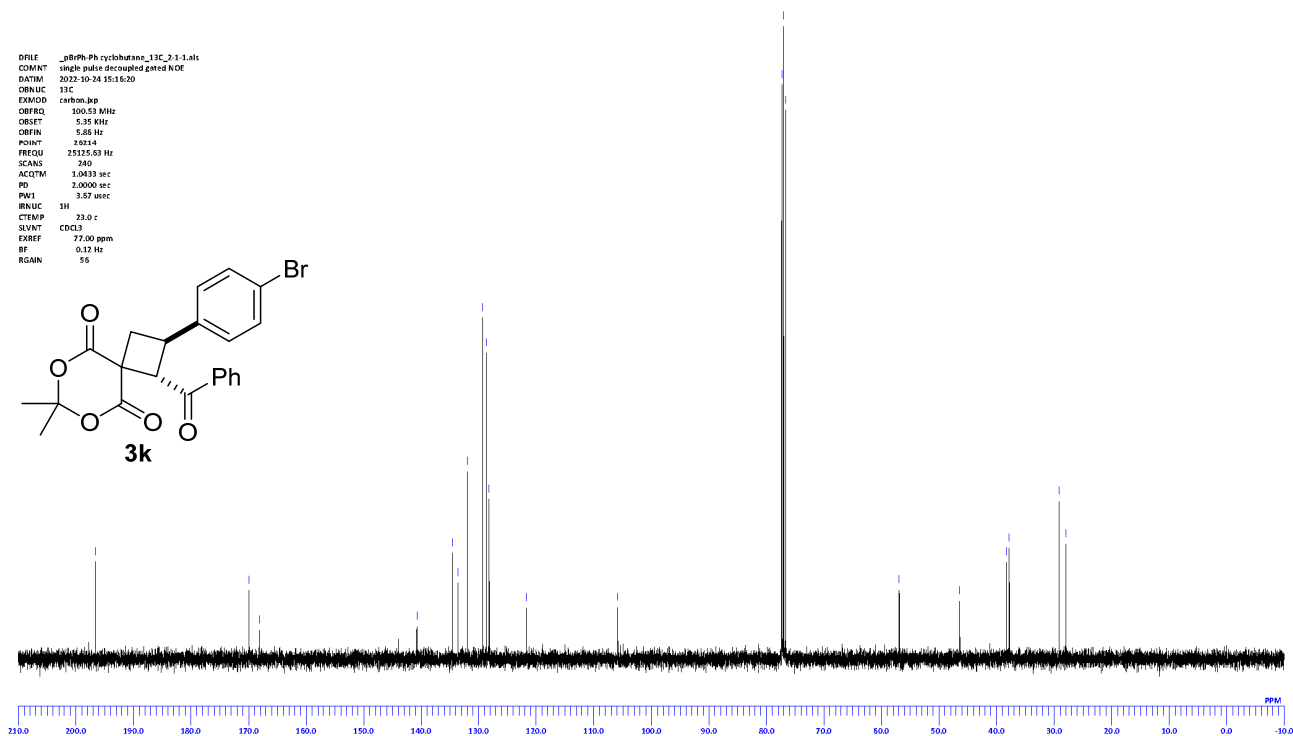



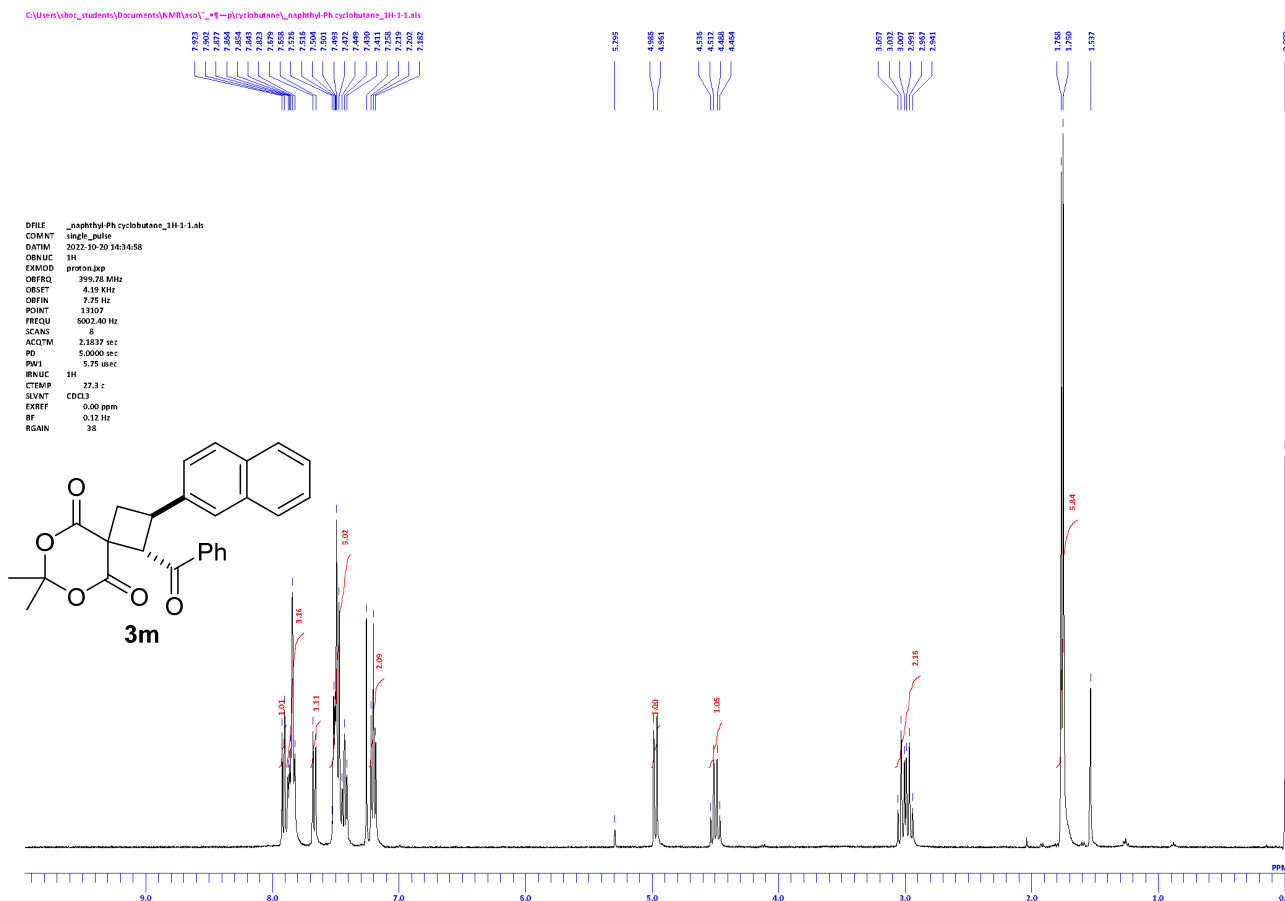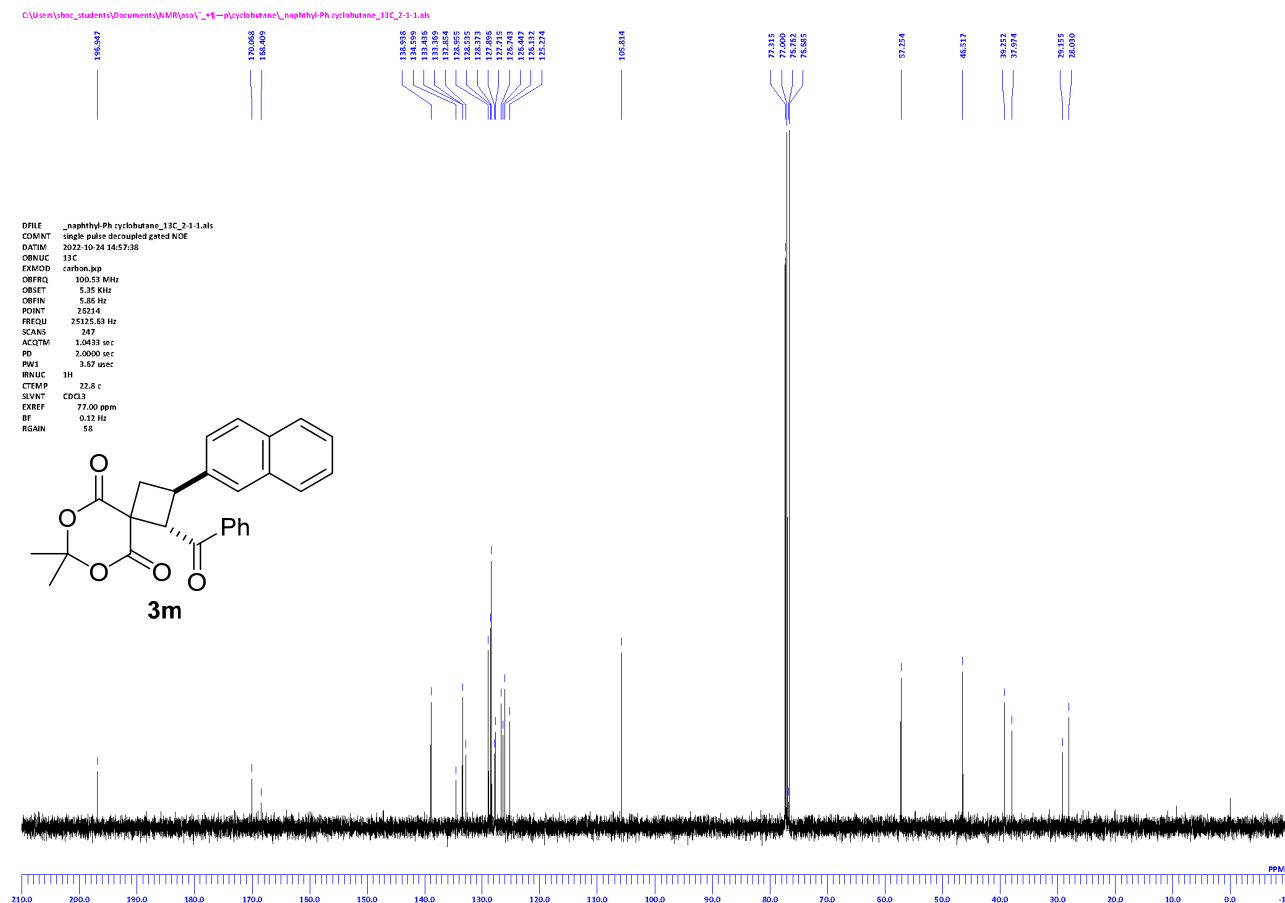

C:\Users\labo\_students\Documents\NMR\aso\\*\_1-p-cyclobutane\_vinyl-Ph cyclobutane\_1H-1-1.a1

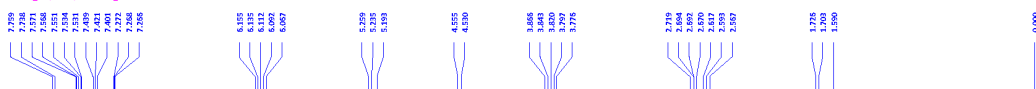

DFILE \_vinyl-Ph cyclobutane\_1H-1-1.a1  
 COMINT single\_pulse  
 DATIM 2022-10-24 14:14:41  
 ORNUC 1H  
 EXMOD proton.jcp  
 OBFRQ 399.76 MHz  
 OBSST 4.19 KHz  
 OBFIN 7.29 Hz  
 POINT 13107  
 FREQU 6002.40 Hz  
 SCANS 8  
 ACQTM 2.1837 sec  
 PD 5.0000 sec  
 PW1 5.75 usec  
 RNUC 1H  
 CTMP 23.1 c  
 SLVNT CDCl3  
 EXREF 0.00 ppm  
 BF 0.12 Hz  
 RGAIN 34

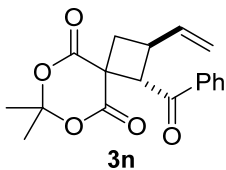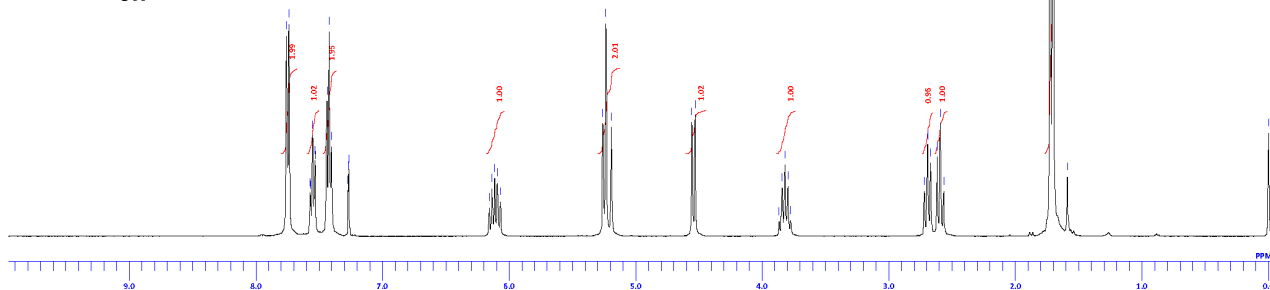

C:\Users\labo\_students\Documents\NMR\aso\\*\_1-p-cyclobutane\_vinyl-Ph cyclobutane\_13C-1-1.a1

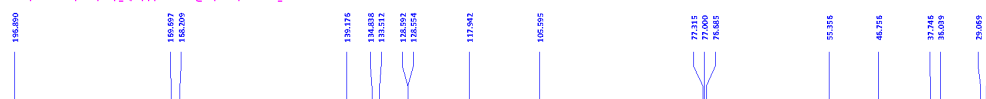

DFILE \_vinyl-Ph cyclobutane\_13C-1-1.a1  
 COMINT single\_pulse decoupled gated NOE  
 DATIM 2022-10-24 14:17:32  
 ORNUC 13C  
 EXMOD carbon.jcp  
 OBFRQ 100.63 MHz  
 OBSST 5.35 KHz  
 OBFIN 5.85 Hz  
 POINT 26114  
 FREQU 2525.63 Hz  
 SCANS 294  
 ACQTM 1.0433 sec  
 PD 2.0000 sec  
 PW1 3.67 usec  
 RNUC 13C  
 CTMP 23.3 c  
 SLVNT CDCl3  
 EXREF 77.00 ppm  
 BF 0.12 Hz  
 RGAIN 56

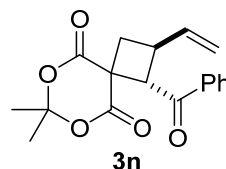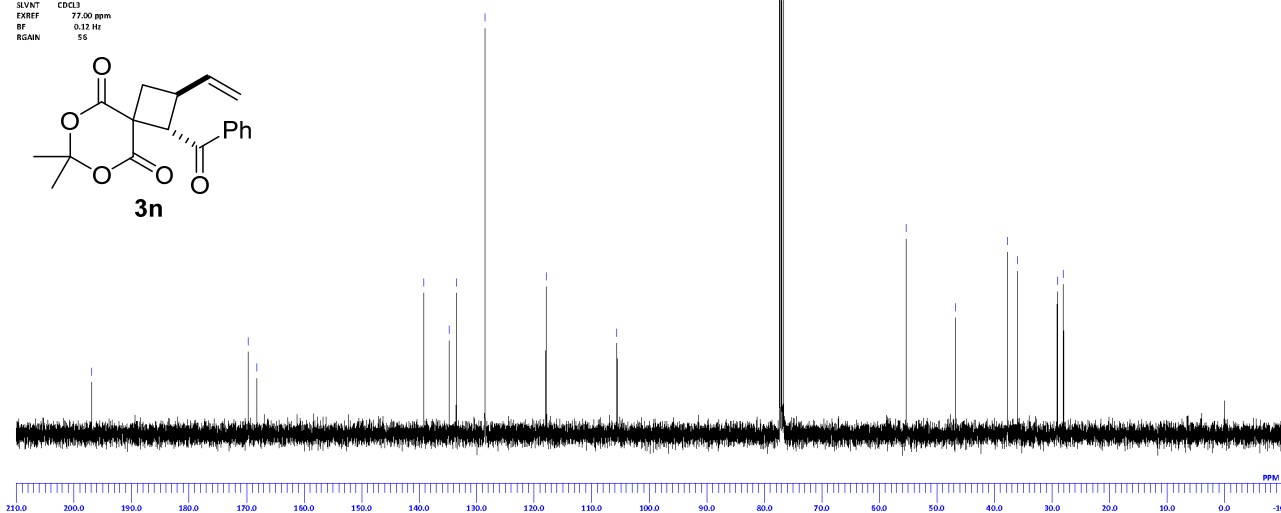



C:\Users\labr\_students\Documents\NMR\asci\\*\_g-p(cyclobutane)\_H-Ph cyclobutane\_1H-1-1ak

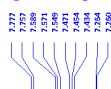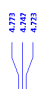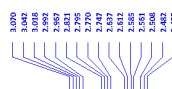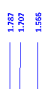

0.000

DFILE \_H-Ph cyclobutane\_1H-1-1ak  
 COMMENT single\_pulse  
 DATIM 2022-10-24 15:05:34  
 ORNUC 1H  
 EXMOD proton.jpg  
 OBFRQ 399.76 MHz  
 OBSET 4.19 KHz  
 OBFIN 7.29 Hz  
 PCHN1 1.5104  
 FREQU 5002.40 Hz  
 SCANS 8  
 ACQTM 2.1837 sec  
 PD 5.0000 sec  
 PW1 5.75 usec  
 RNLC 1H  
 CTEMP 73.0 c  
 SLVNT CDCl3  
 EXREF 0.00 ppm  
 BF 0.12 Hz  
 RGAIN 38

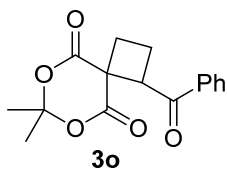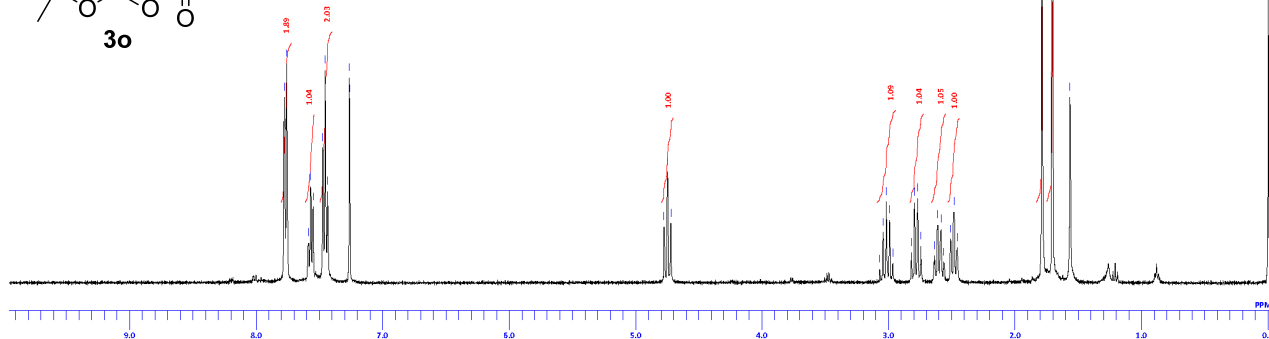

C:\Users\labr\_students\Documents\NMR\asci\\*\_g-p(cyclobutane)\_13C-1-1ak

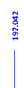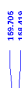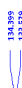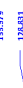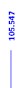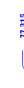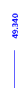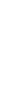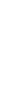

DFILE \_H-Ph cyclobutane\_13C-1-1ak  
 COMMENT single\_pulse decoupled gated NOE  
 DATIM 2022-10-24 15:09:28  
 ORNUC 13C  
 EXMOD carbon.jpg  
 OBFRQ 100.53 MHz  
 OBSET 5.35 KHz  
 OBFIN 5.66 Hz  
 POINT 25214  
 FREQU 2512.53 Hz  
 SCANS 533  
 ACQTM 1.0433 sec  
 PD 2.0000 sec  
 PW1 3.67 usec  
 RNLC 1H  
 CTEMP 72.9 c  
 SLVNT CDCl3  
 EXREF 77.00 ppm  
 BF 0.12 Hz  
 RGAIN 58

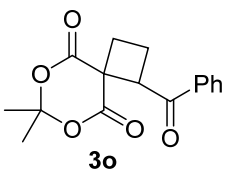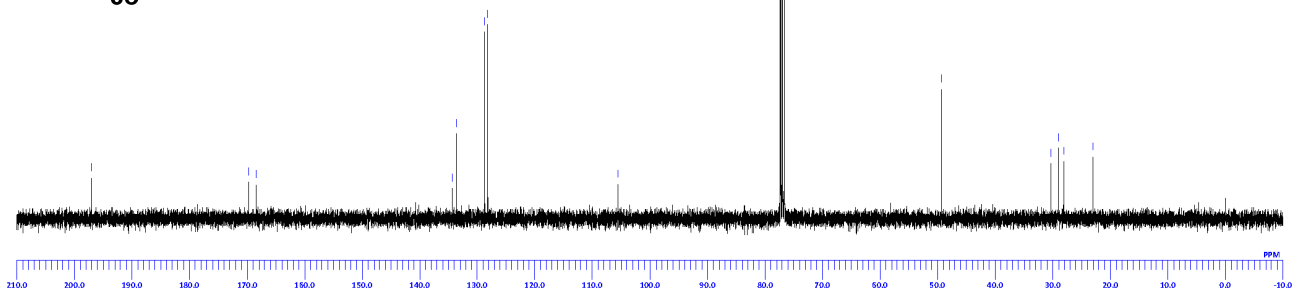



C:\Users\laboc\_students\Documents\NMR\onaki\C%4\7\7@\*C1\1X\barbiturate\_Ph-Ph-4-barbiturate-1-1.a1s

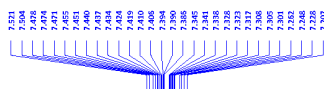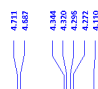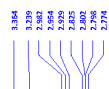

DFILE \_Ph-Ph-4-barbiturate-1-1.a1s  
COMINT single\_pulse  
DATIM 2023-02-17 17:50:04  
ORNUC 1H  
EXMOD proton\_kp  
OBFREQ 399.78 MHz  
OBSET 4.19 kHz  
ORFIN 7.29 Hz  
POINT 10.884  
FREQU 7503.00 Hz  
SCANS 8  
ACQTM 2.1837 sec  
PD 5.0000 sec  
PW1 5.55 usec  
ORNUC 1H  
CTEMP 22.0 c  
SLVNT CDCL3  
EXREF 0.00 ppm  
RF 0.12 Hz  
RGAIN 39

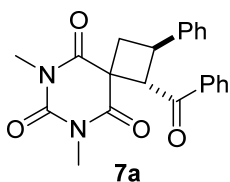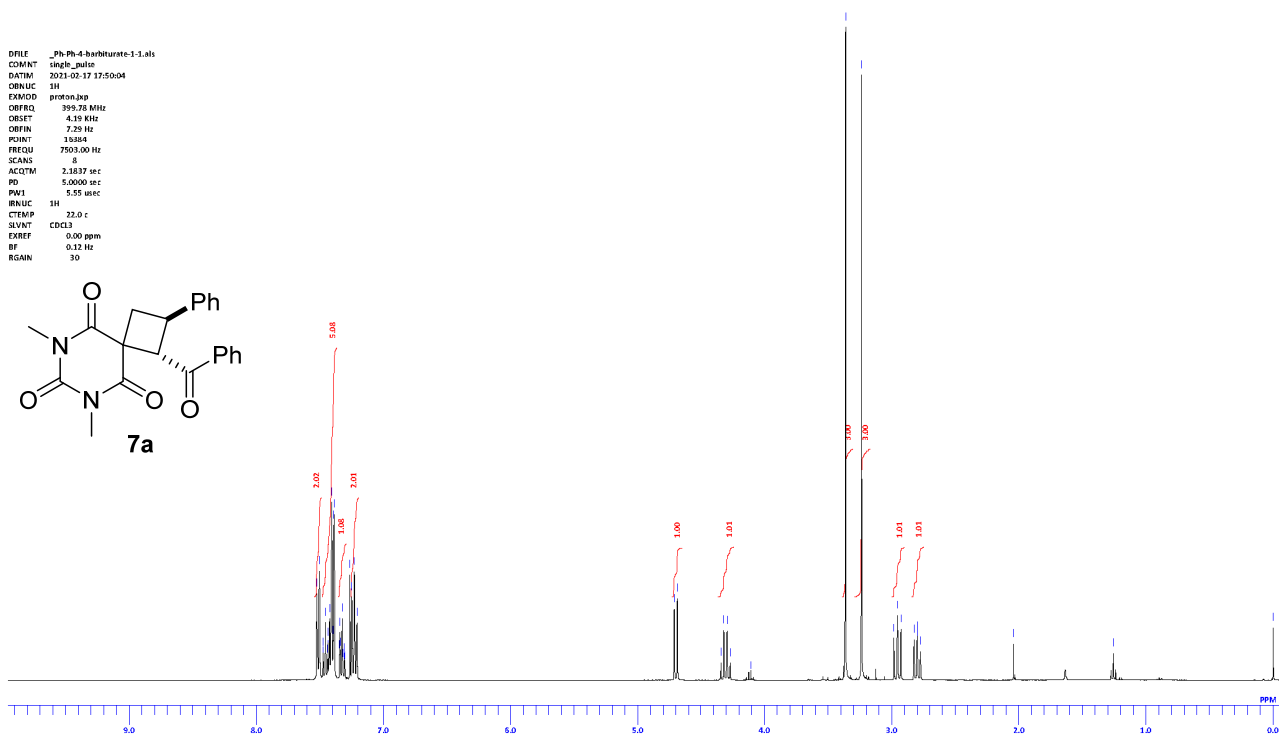

C:\Users\laboc\_students\Documents\NMR\onaki\C%4\7\7@\*C1\1X\barbiturate\_Ph-Ph-4-barbiturate-13C-1-1.a1s

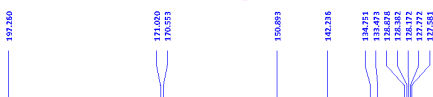

DFILE \_Ph-Ph-4-barbiturate-13C-1-1.a1s  
COMINT single\_pulse\_decoupled\_gated\_NOE  
DATIM 2023-02-17 17:52:33  
ORNUC 13C  
EXMOD carbon\_kp  
OBFREQ 100.53 MHz  
OBSET 5.35 kHz  
ORFIN 5.86 Hz  
POINT 32297  
FREQU 31407.08 Hz  
SCANS 175  
ACQTM 1.0433 sec  
PD 3.0000 sec  
PW1 3.33 usec  
ORNUC 1H  
CTEMP 22.2 c  
SLVNT CDCL3  
EXREF 77.00 ppm  
RF 0.12 Hz  
RGAIN 55

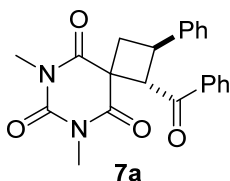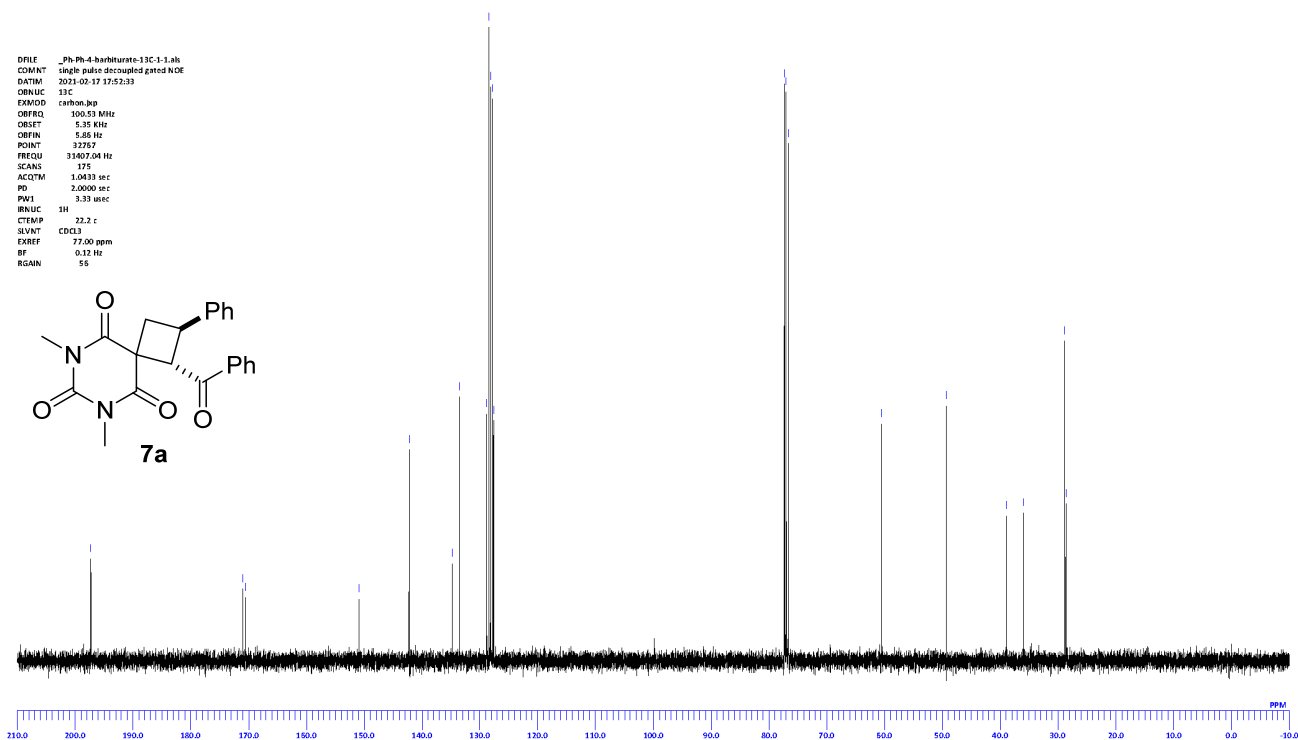

C:\Users\hobc\_students\Documents\NMR\onaki\CN-4\11\8\1\8a\barbiturate\_Ph-Ph-5-barbiturate-re-3-1.als

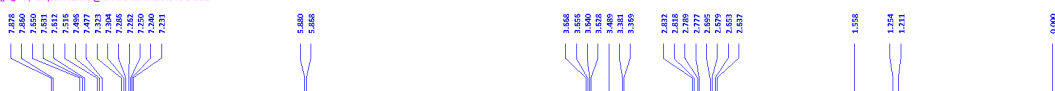

DFILE \_Ph-Ph-5-barbiturate-re-3-1.als  
 COMNT single\_pulse  
 DATIM 2021-07-17 17:44:05  
 ORNUC 1H  
 EXMOD proton\_jkp  
 ORFQ 395.76 MHz  
 OBSE 4.19 KHz  
 ORFN 7.25 KHz  
 POINT 15384  
 FREQU 7502.00 Hz  
 SCANS 8  
 ACQTM 2.1837 sec  
 PD 5.0000 sec  
 PW1 5.55 usec  
 BRNUC 1H  
 CTEMP 22.0 c  
 SLVNT CDCl3  
 EXREF 0.00 ppm  
 BF 0.12 Hz  
 RGAIN 38

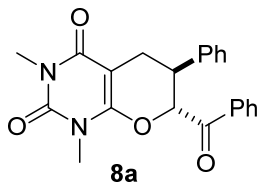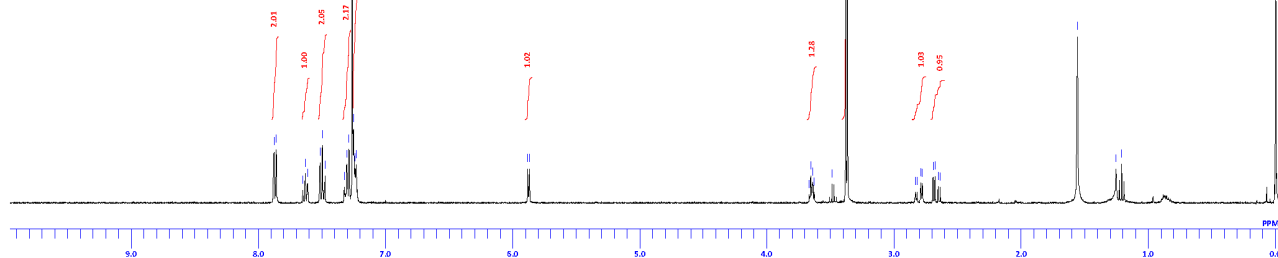

C:\Users\hobc\_students\Documents\NMR\onaki\CN-4\11\8\1\8a\barbiturate\_Ph-Ph-5-barbiturate-13C-re-3-1.als

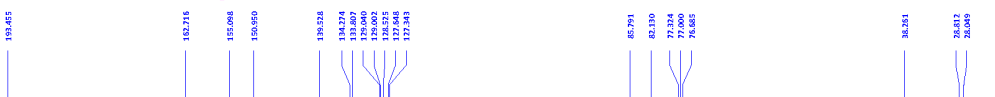

DFILE \_Ph-Ph-5-barbiturate-13C-re-3-1.als  
 COMNT single pulse decoupled gated NOE  
 DATIM 2023-03-10 21:27:35  
 ORNUC 13C  
 EXMOD carbon\_jkp  
 ORFQ 100.53 MHz  
 OBSE 5.35 KHz  
 ORFN 5.85 Hz  
 POINT 32297  
 FREQU 31407.08 Hz  
 SCANS 851  
 ACQTM 1.0453 sec  
 PD 3.0000 sec  
 PW1 3.57 usec  
 BRNUC 1H  
 CTEMP 22.8 c  
 SLVNT CDCl3  
 EXREF 77.00 ppm  
 BF 0.12 Hz  
 RGAIN 58

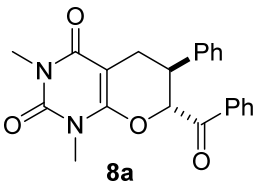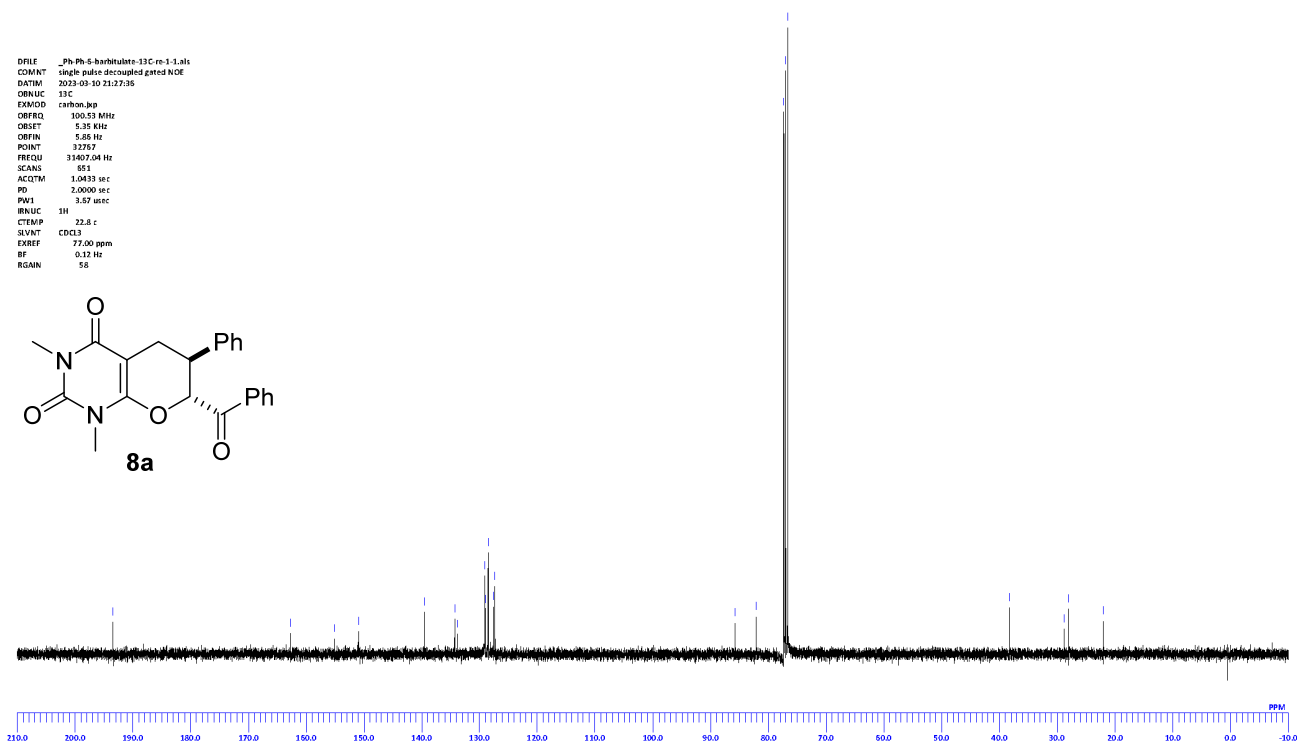

C:\Users\iboc\_students\Documents\NMR\onaki\Cu-Aff\\*C1-1X\barbarulato\_Ph-OEt-4-barbulato-1-1.ah

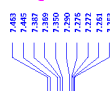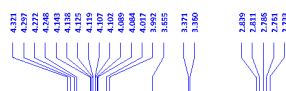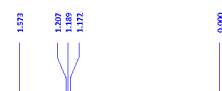

DIRLE \_Ph-OEt-4-barbulato-1-1.ah  
 COMNT single\_pulse  
 DATIM 2023-03-08 15:12:43  
 OBNUC 1H  
 EXMDO proton.hcp  
 OBFREQ 395.26 MHz  
 OBSSET 4.19 kHz  
 OBFIN 7.79 Hz  
 POINT 13107  
 FREQU 6007.40 Hz  
 SCANS 8  
 ACQTM 2.1837 sec  
 PD 5.0000 sec  
 PWD 5.75 usec  
 BNUC 1H  
 CTEMP 22.7 c  
 SOLVT CDCl3  
 EXREF 0.00 ppm  
 BF 0.10 Hz  
 RGAIN 35

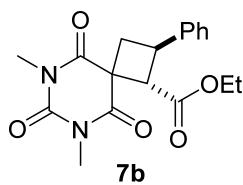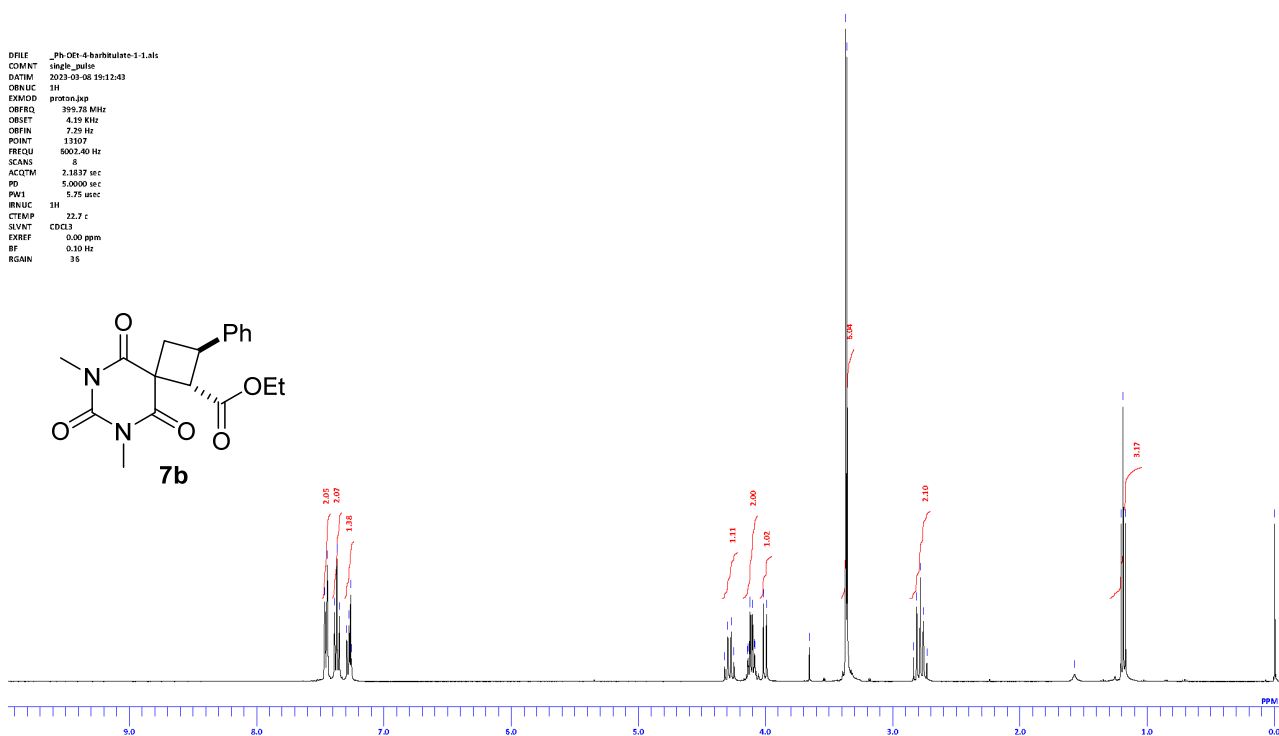

C:\Users\iboc\_students\Documents\NMR\onaki\Cu-Aff\\*C1-1X\barbarulato\_Ph-OEt-4-barbulato-13C-1-1.ah

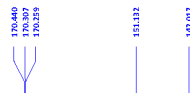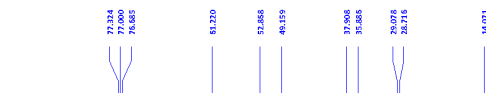

DIRLE \_Ph-OEt-4-barbulato-13C-1-1.ah  
 COMNT single pulse decoupled gated vde  
 DATIM 2023-03-08 15:14:49  
 OBNUC 13C  
 EXMDO carbon.hcp  
 OBFREQ 100.53 MHz  
 OBSSET 5.35 kHz  
 OBFIN 5.55 Hz  
 POINT 26214  
 FREQU 25125.63 Hz  
 SCANS 302  
 ACQTM 1.0433 sec  
 PD 2.0000 sec  
 PWD 3.57 usec  
 BNUC 1H  
 CTEMP 22.7 c  
 SOLVT CDCl3  
 EXREF 77.00 ppm  
 BF 0.10 Hz  
 RGAIN 56

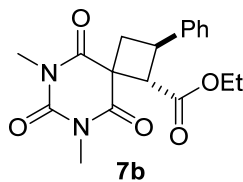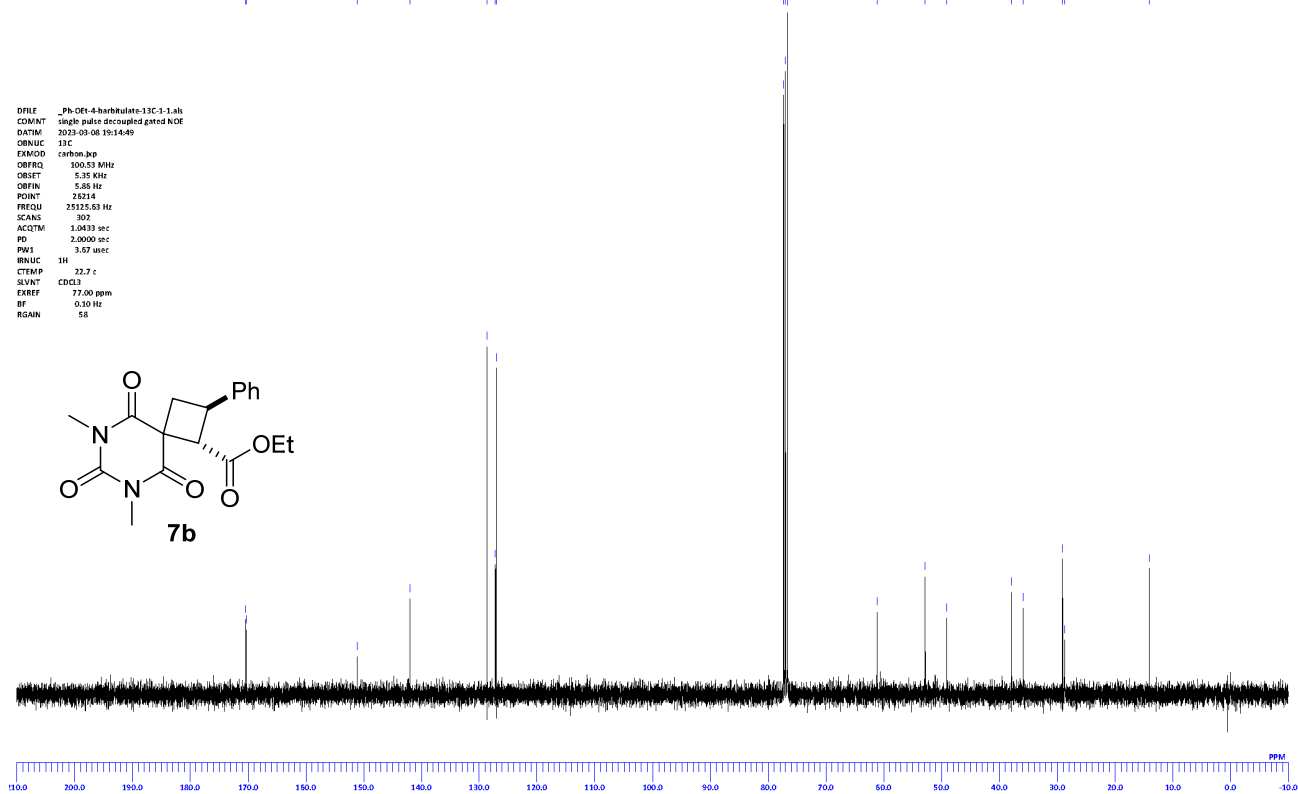

C:\Users\stoc\_students\Documents\NMR\anuk\13C\4\FT\8b\Ph-OEt-5-barbiturate-1-1.a1s

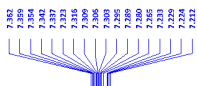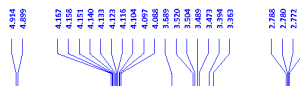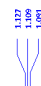

DRIFLE \_Ph-OEt-5-barbiturate-1-1.a1s  
 COMMENT single\_pulse  
 DATIM 2023-03-08 19:36:14  
 ORNLUC 1H  
 EXMIDD proton.kp  
 OBFRQ 399.76 MHz  
 OBSET 4.19 KHz  
 OBFIN 7.29 Hz  
 POINT 13107  
 FREQU 6002.40 Hz  
 SCANS 6  
 ACQTM 2.1837 sec  
 PD 5.0000 sec  
 PW1 5.79 usec  
 IRNLUC 1H  
 CTMP 32.4 c  
 SVNT CDCl3  
 EXREF 0.00 ppm  
 BF 0.10 Hz  
 RGAIN 36

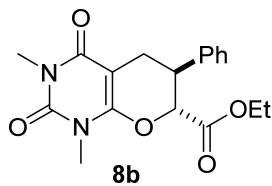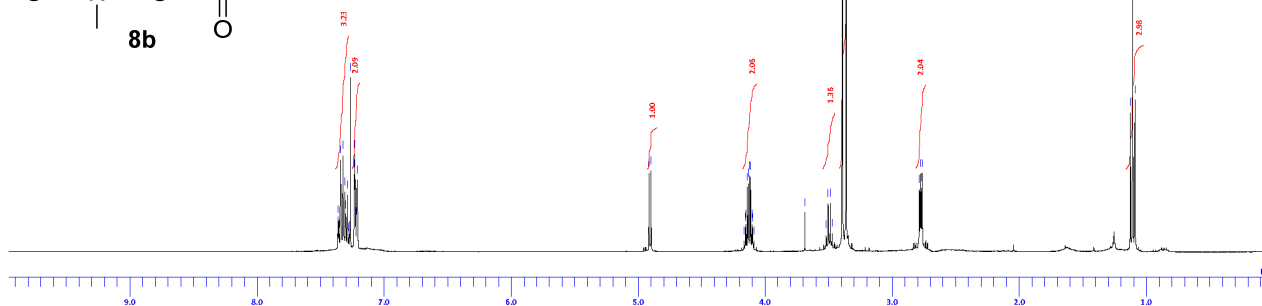

C:\Users\stoc\_students\Documents\NMR\anuk\13C\4\FT\8b\Ph-OEt-5-barbiturate-13C-re-1-1.a1s

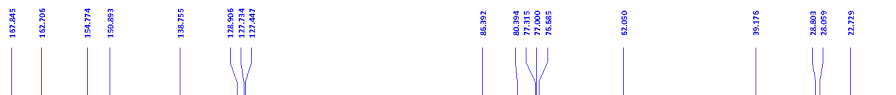

DRIFLE \_Ph-OEt-5-barbiturate-13C-re-1-1.a1s  
 COMMENT single\_pulse decoupled gated NDE  
 DATIM 2023-03-10 20:45:25  
 ORNLUC 13C  
 EXMIDD carbon.kp  
 OBFRQ 100.63 MHz  
 OBSET 5.35 KHz  
 OBFIN 5.86 Hz  
 POINT 32767  
 FREQU 31407.04 Hz  
 SCANS 746  
 ACQTM 1.0453 sec  
 PD 2.0000 sec  
 PW1 3.57 usec  
 IRNLUC 1H  
 CTMP 22.6 c  
 SVNT CDCl3  
 EXREF 1.20 Hz  
 BF 1.20 Hz  
 RGAIN 55

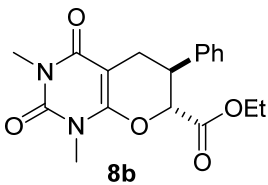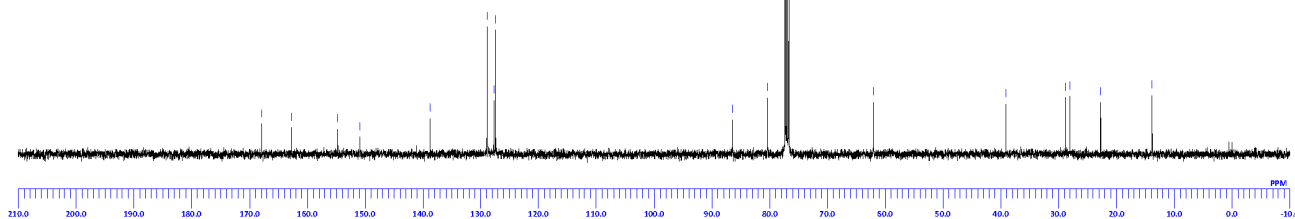

Supplement: d3cc06033k1.pdf [file d3cc06033k1.pdf]
